# Supplementary material for: Discovery of an Aldo-Keto reductase 1C3 (AKR1C3) degrader
Source: PubMed Central journal article supplement (PMC11059152; doi:10.1038/s42004-024-01177-4), 2024-04-29

## Discovery of an Aldo-Keto Reductase 1C3 (AKR1C3) Degradar

Angelica V. Carmona,<sup>a,#</sup> Shirisha Jonnalagadda,<sup>a,#</sup> Alfie M. Case,<sup>a</sup> Krishnaiah Maddeboina,<sup>a</sup> Sravan K. Jonnalagadda,<sup>a</sup> Louise F. Dow,<sup>a</sup> Ling Duan,<sup>b</sup> Trevor M. Penning,<sup>b</sup> Paul C. Trippier<sup>a,c,d</sup>

### Supplementary Material

<sup>a</sup>Department of Pharmaceutical Sciences, College of Pharmacy, University of Nebraska Medical Center, Omaha, Nebraska 68106, United States

<sup>b</sup>Center of Excellence in Environmental Toxicology, Department of Systems Pharmacology and Translational Therapeutics, University of Pennsylvania, Philadelphia, Pennsylvania 19104, United States

<sup>c</sup>Fred & Pamela Buffett Cancer Center, University of Nebraska Medical Center, Omaha, Nebraska 68106, United States

<sup>d</sup>UNMC Center for Drug Discovery, University of Nebraska Medical Center, Omaha, Nebraska 68106, United States

<sup>#</sup>These authors contributed equally to this work

## Contents

|                                                                  |    |
|------------------------------------------------------------------|----|
| Figure S1                                                        | 3  |
| Figure S2                                                        | 4  |
| Figure S3                                                        | 5  |
| Figure S4                                                        | 6  |
| Figure S5                                                        | 7  |
| Figure S6                                                        | 8  |
| Supplementary Methods                                            | 9  |
| Experimental Methods                                             | 9  |
| Supplementary References                                         | 13 |
| $^1\text{H}$ , $^{13}\text{C}$ NMR Spectra and raw Western blots | 14 |

**Figure S1.** Western blots and quantification of AKR1C3, AKR1C1/C2 and ARv7 protein expression in 22Rv1 prostate cancer cells treated with A) AKR1C3 inhibitor **3** at 43 nM; B) AKR1C3 inhibitor **3** at 1  $\mu$ M; C) AKR1C3 inhibitor warhead **4** at 1  $\mu$ M and D) DMSO; for 0, 24, 48 and 72 hours. Images are representative of at least two technical replicates. Graphs represent mean values  $\pm$  SEM.

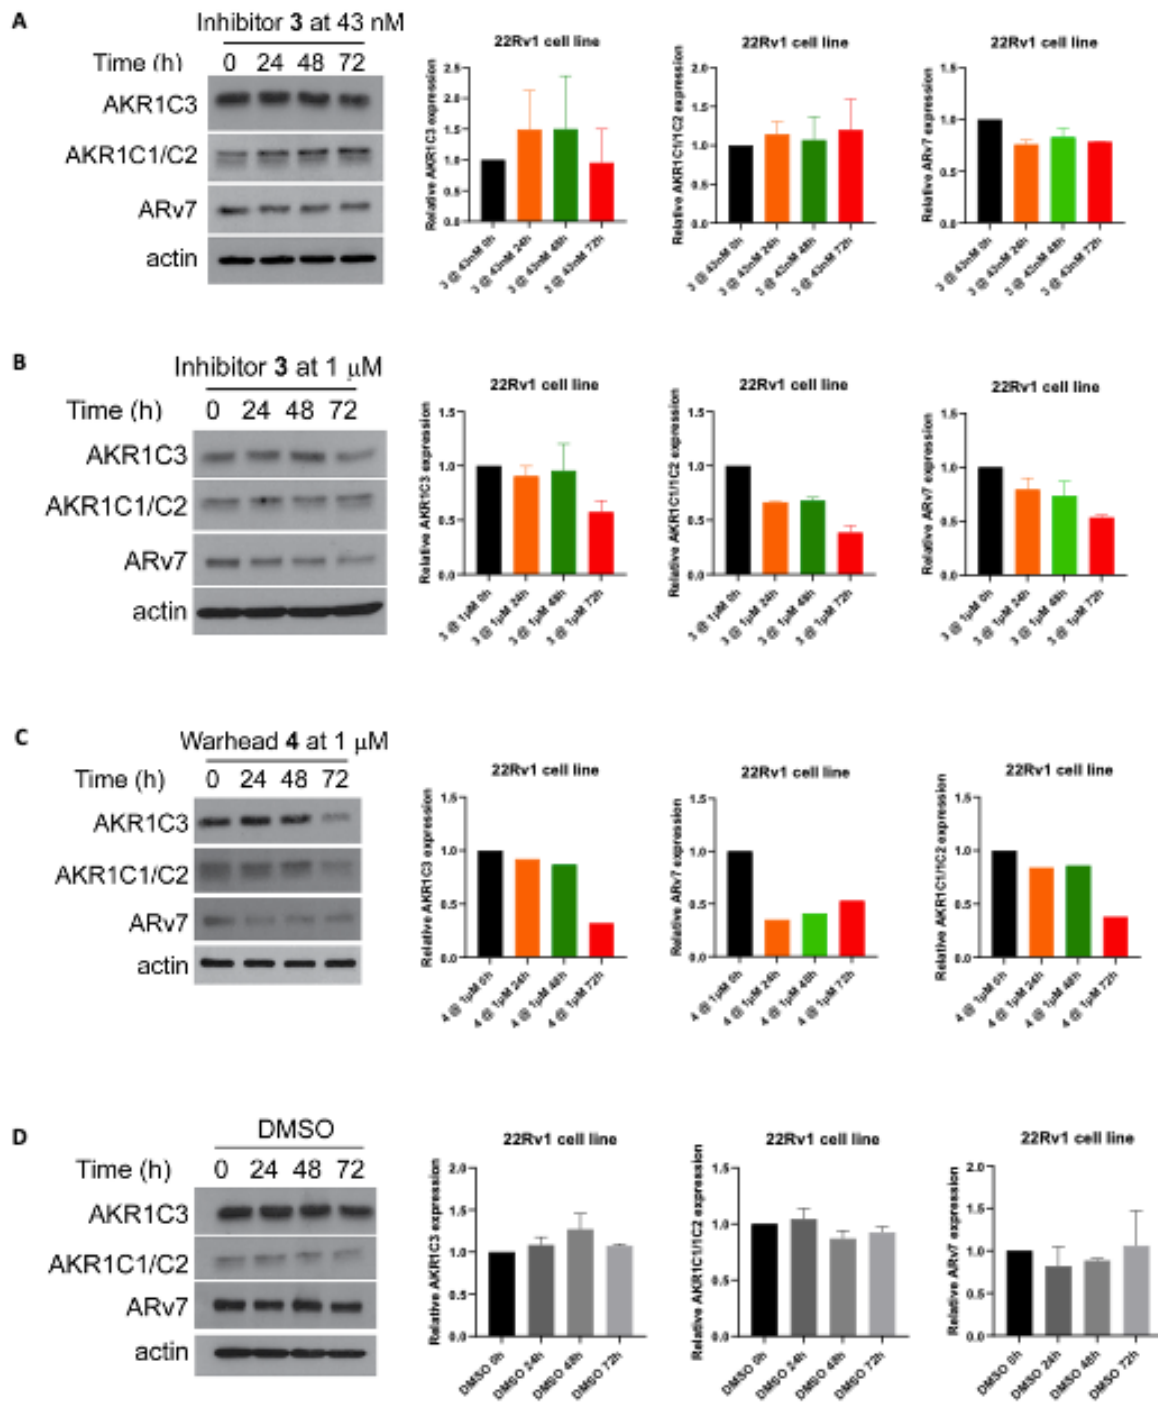

**Figure S2.** Half-maximal inhibition ( $IC_{50}$ ) curves versus AKR1C3 for Warhead **4** and PROTAC **5**. Isolated enzyme assay.

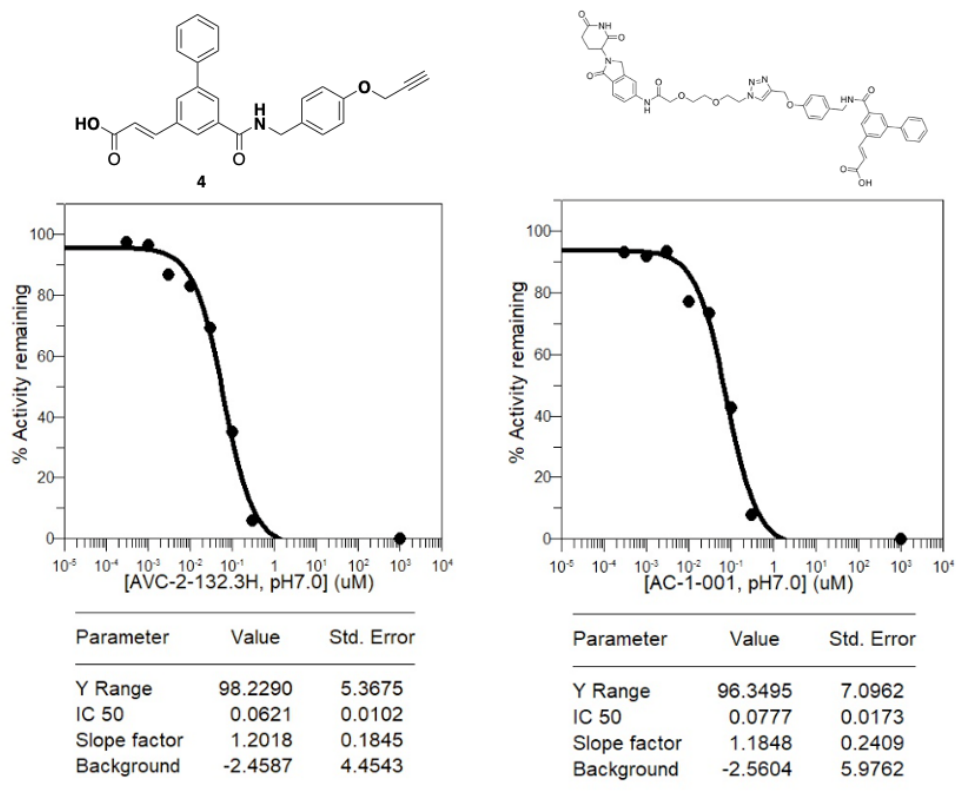

**Figure S3.** Activity of selected compounds to ameliorate 22Rv1 prostate cancer cell viability. A) PROTAC **5**, B) AKR1C3 inhibitor **3**, C) E3 ligase ligand lenalidomide **6**, were treated with specified concentrations for 72 h. The  $IC_{50}$  was obtained by MTS assay. Data is representative of the mean  $\pm$  standard deviation of two independent experiments performed in duplicate.

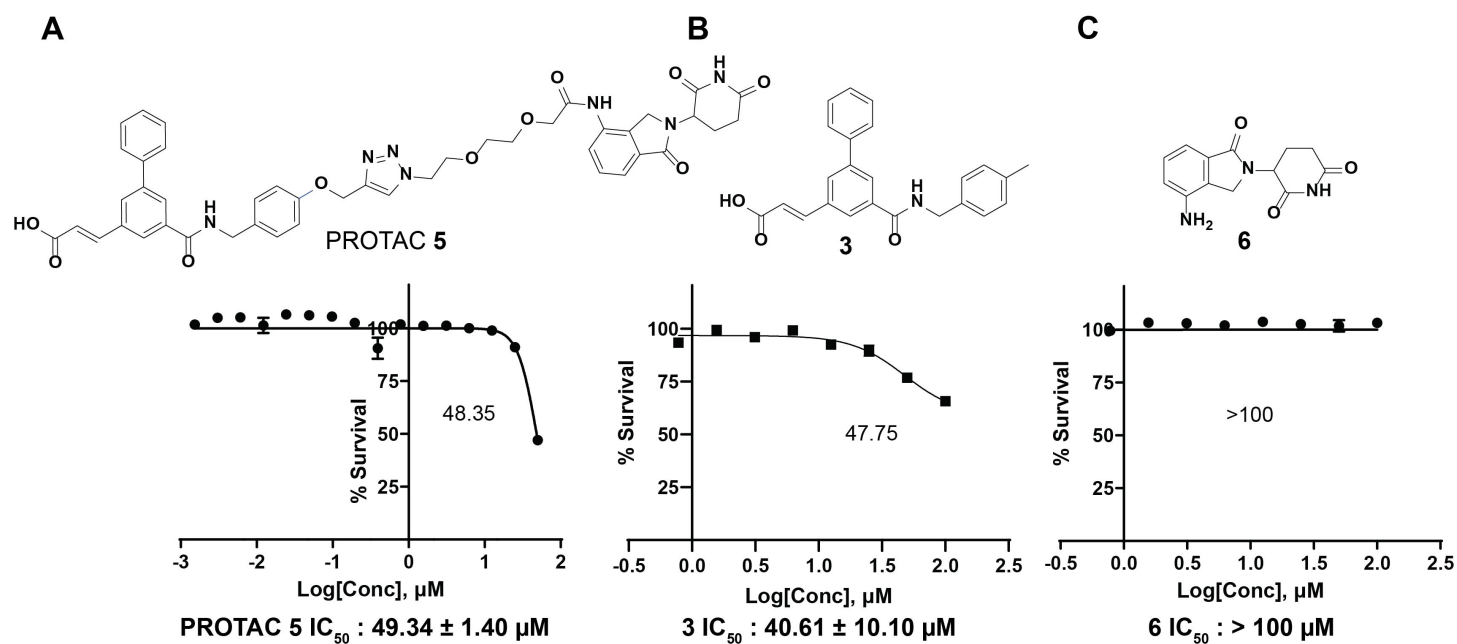

**Figure S4.** (A) Time study of degradation effect of AKR1C3 upon treatment of PROTAC 5 (1 nM) at different time points (0, 2, 4, 6, 12, 16, 24, 48, and 72 h). Blots are representative of two separate experiments; (B) Quantitative of A for AKR1C3 expression; (C) Combined quantification of AKR1C3 expression from n=2 experiments; Data obtained from at least two biological independent experiments are depicted as mean  $\pm$  SEM.

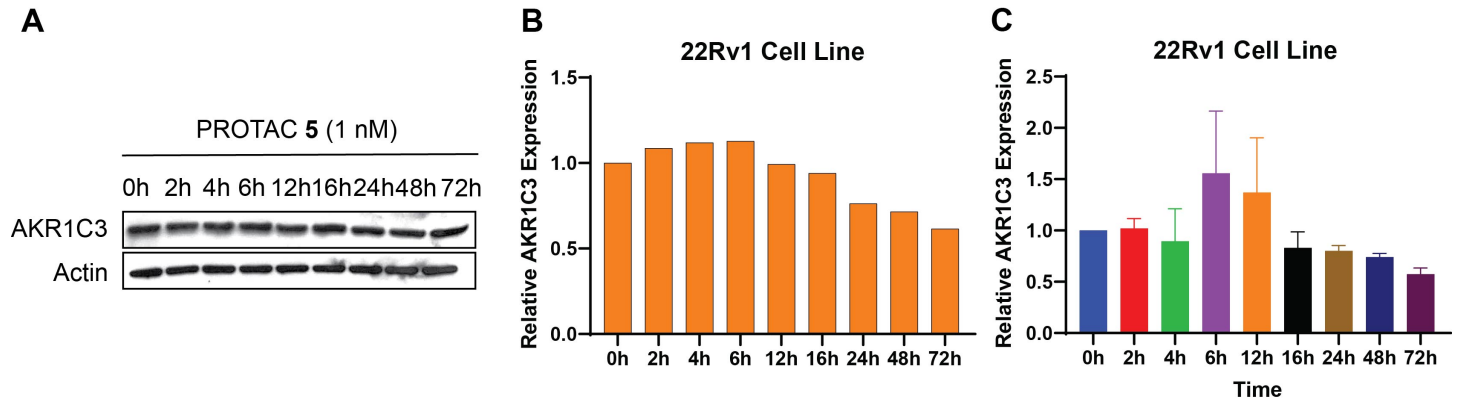

**Figure S5** Western blot analyses of AKR1C3 degradation upon the treatment of lenalidomide **6** (10  $\mu$ M) and degrader **5** at 1, 10 and 50  $\mu$ M concentrations for 24 h (A); (B) Quantitative analyses of the relative AKR1C3 protein levels at 1, 10, and 50  $\mu$ M of A; (C) Quantification of the relative AKR1C3 protein levels at 1, 10, and 50  $\mu$ M, data was obtained from two independent experiments and shown as mean  $\pm$  standard deviation.

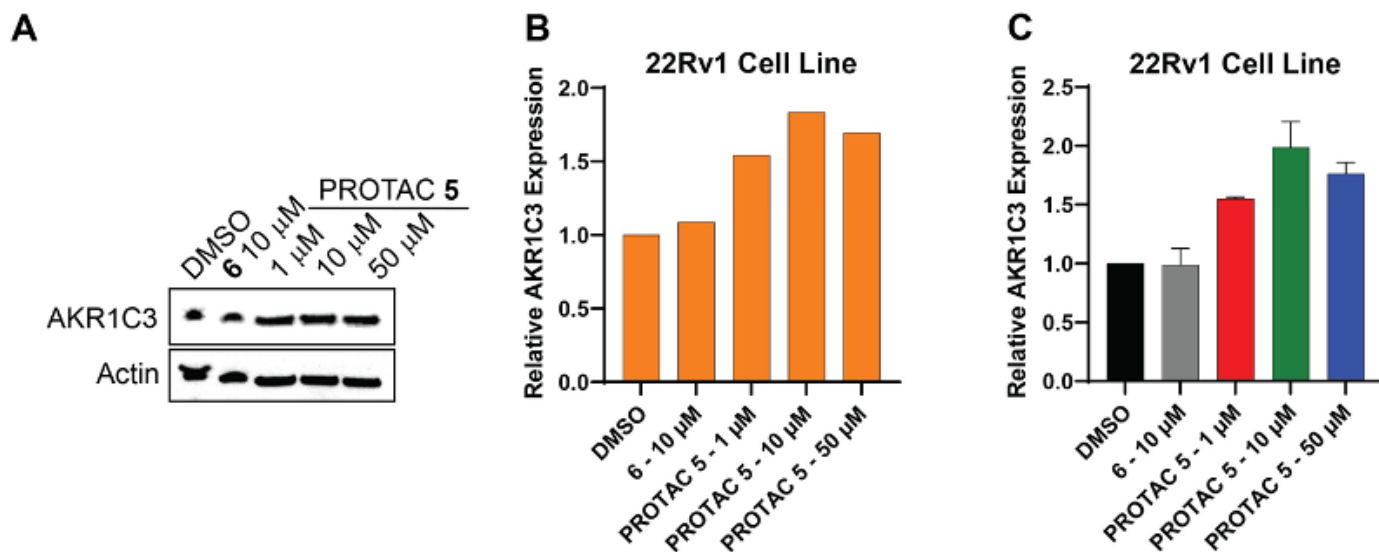

**Figure S6.** Half-maximal degradation ( $DC_{50}$ ) curves versus AKR1C3, AKR1C2/3 and ARv7 for PROTAC 5 in 22Rv1 cells after 72 hour treatment.

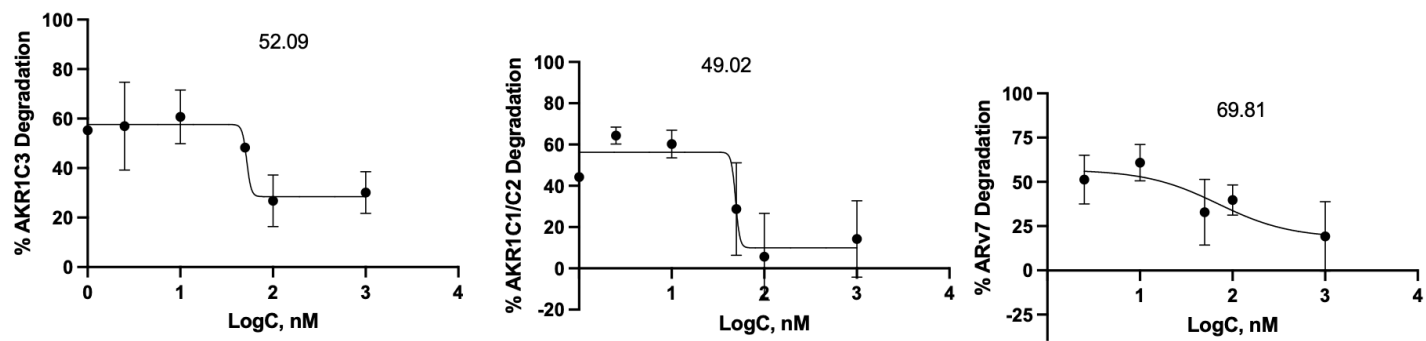



## Supplementary Methods

### Experimental Methods

#### General chemistry procedures

All reactions were carried out in oven-dried glassware under positive nitrogen pressure unless otherwise noted. Reaction progress was monitored by thin-layer chromatography carried out on silica gel plates (2.5 cm × 7.5 cm, 200 μm thick, 60 F254) and visualized by using UV (254 nm) or by dragendorff solution as indicator. Flash column chromatography was performed with silica gel (40–63 μm, 60 Å) using the mobile phase indicated. Commercial grade solvents and reagents were purchased from Fisher Scientific (Houston, TX) or Sigma-Aldrich (Milwaukee, WI) and were used without further purification. Anhydrous solvents were purchased from Across Organics and stored under an atmosphere of dry nitrogen over molecular sieves.

<sup>1</sup>H and <sup>13</sup>C NMR spectra were recorded in the indicated solvent on a Bruker 400 MHz Advance III HD spectrometer at 400 and 100 MHz for <sup>1</sup>H and <sup>13</sup>C, respectively. Multiplicities are indicated by s (single), d (doublet), t (triplet), m (multiplet), and br (broad). Chemical shifts (δ) are reported in parts per million (ppm) and coupling constants (J), in hertz.

High-resolution mass spectra (HRMS) were recorded with an Agilent 6230 LC/TOF spectrometer using an ESI source coupled to an Agilent Infinity 1260 system running in reverse phase with a ZORBAX RRHT Extend-C18 (80 Å, 2.1 x 50 mm, 1.8 μm) column using solvent A (water with 0.1 % Formic acid), solvent B (acetonitrile with 0.1 % Formic acid), and a flow rate of 0.6 mL/min starting a mixture of 95% A and 5% B. Solvent B is gradually increased to 95% at 5 min, held at 95% until 6 min, then gradually ramped back down to 5% at 8.0 min. The purity analysis of final compounds was determined ≥95% pure using a Waters ACQUITY ultra-performance liquid chromatography (UPLC) H-Class System with TUV (254 nm) detector and Empower 2 software (Milford, MA, USA) using an Agilent Eclipse plus C18 5μ column (4.6 X 150 mm). Chromatography was performed using solvent A (water with 0.1 % Trifluoroacetic acid), solvent B (methanol with 0.1 % Trifluoroacetic acid), and a flow rate of 1.0 mL/min for 20 min. with an isocratic system (20:80, A:B)

4-((*tert*-butyldiphenylsilyloxy)phenyl)methanamine (**8**). To a stirred solution of 4-(aminomethyl)phenol (**7**) (1.85 g, 15.0 mmol, 1 equiv) in anhydrous tetrahydrofuran (75 mL) imidazole (2.04 g, 30.0 mmol, 2 equiv) was added followed by the addition of *tert*-butylchlorodiphenylsilane (TBDPSiCl) (5.8 mL, 22.5 mmol, 1.5 equiv). The mixture stirred overnight at room temperature under a N<sub>2</sub> atmosphere. Water was added and the solution was extracted with DCM. The organic layer was collected, dried over anhydrous Na<sub>2</sub>SO<sub>4</sub>, filtered, and concentrated in vacuo. The crude product was purified by flash column chromatography using hexane/EtOAc as the eluents to afford the titled compound as a yellow solid (3.09 g, 57%). R<sub>f</sub> = 0.07 (hexane/EtOAc = 9:1). <sup>1</sup>H NMR (400 MHz, CDCl<sub>3</sub>): δ<sub>H</sub> 1.15 (9H, s), 1.86 (2H, s), 3.75 (2H, s), 6.77 (d, J = 8.0 Hz, 2H), 7.05 (d, J = 8.0 Hz, 2H) 7.38-7.46 (6 H, m), 7.76 (d, J = 8.0 Hz, 4H). <sup>13</sup>C NMR (100 MHz, CDCl<sub>3</sub>): δ<sub>C</sub> 19.5, 26.6, 45.8, 119.7, 127.8, 128.1, 129.9, 133.0, 135.5, 135.5, 154.5.

3-bromo-*N*-(4-((*tert*-butyldiphenylsilyloxy)benzyl)-5-iodobenzamide (**10**). To a stirred solution of 3-bromo-5-iodobenzoic acid (**9**) (0.72 g, 2.2 mmol, 1 equiv) in anhydrous DCM (12 mL) was added EDC·HCl (0.51 g, 2.7 mmol, 1.2 equiv) and HOBt hydrate (0.44 g, 2.7 mmol, 1.2 equiv) at 0 °C under a N<sub>2</sub> atmosphere. At room temperature DIPEA (0.86 g, 6.6 mmol, 3 equiv) and **8** (0.80 g, 2.2 mmol, 1 equiv) was added, the mixture stirred overnight at room temperature under a N<sub>2</sub> atmosphere. The reaction mixture was washed with a saturated solution of NH<sub>4</sub>Cl, water, and extracted with DCM. The organic layer was collected, dried over anhydrous Na<sub>2</sub>SO<sub>4</sub>, filtered, and concentrated in vacuo to afford the titled compound as a tan solid (1.29 g, 87%). R<sub>f</sub> = 0.43 (hexane/EtOAc = 6:1). <sup>1</sup>H NMR (400 MHz, CDCl<sub>3</sub>): δ<sub>H</sub> 1.13 (9H, s), 4.46 (d, J = 4.0 Hz, 2H), 6.41 (t, J = 6.0 Hz, 1H), 6.75 (d, J = 12.0 Hz, 2H), 7.05 (d, J = 12.0 Hz, 2H), 7.37-7.47 (7H, m), 7.73 (d, J = 8.0 Hz, 4H), 7.85 (1H, s), 7.96 (d,

$J = 16.0$  Hz, 2H).  $^{13}\text{C}$  NMR (100 MHz,  $\text{CDCl}_3$ ):  $\delta_{\text{C}}$  19.5, 26.5, 43.9, 94.5, 120.0, 123.2, 127.8, 129.1, 129.9, 130.1, 132.6, 134.7, 135.5, 137.8, 142.4, 155.3, 164.3.

Methyl (*E*)-3-(3-bromo-5-((4-((*tert*-butyldiphenylsilyl)oxy)benzyl)carbamoyl)phenyl)acrylate (**11**) To a stirred solution of (**10**) (2.1 g, 3.1 mmol, 1 equiv) in anhydrous toluene (42 mL) was added methyl acrylate (0.42 mL, 4.7 mmol, 1.5 equiv),  $\text{P}(\text{Ph})_3$  (0.08 g, 0.3 mmol, 0.1 equiv),  $\text{NEt}_3$  (1.31 mL, 9.4 mmol, 3 equiv) and  $\text{Pd}(\text{OAc})_2$  (0.07 g, 0.3 mmol, 0.1 equiv) and the reaction refluxed overnight under a  $\text{N}_2$  atmosphere. While the reaction mixture was still hot, the contents were filtered. The filtrate was then allowed to cool and was filtered through a celite® pad with DCM. The reaction mixture was washed with a saturated solution of  $\text{NH}_4\text{Cl}$ , water, and extracted with DCM. The organic layer was collected, dried over anhydrous  $\text{Na}_2\text{SO}_4$ , filtered, and concentrated in vacuo. The crude product was purified by flash column chromatography using DCM/MeOH as the eluents to afford the titled compound as a brown semi-solid (0.60 g, 30%).  $R_f = 0.1$  (DCM/MeOH = 1:0).  $^1\text{H}$  NMR (400 MHz,  $\text{CDCl}_3$ ):  $\delta_{\text{H}}$  1.10 (9H, s), 3.80 (3H, s), 4.47 (d,  $J = 4.0$  Hz, 2H), 6.36 (1H, br. s), 6.43 (d,  $J = 16.0$  Hz, 1H), 6.73 (d,  $J = 8.0$  Hz, 2H), 7.05 (d,  $J = 8.0$  Hz, 2H), 7.35-7.44 (6H, m), 7.56 (d,  $J = 16.0$  Hz, 1H), 7.70 (d,  $J = 8.0$  Hz, 5H), 7.80 (d,  $J = 12.0$  Hz, 1H).  $^{13}\text{C}$  NMR (100 MHz,  $\text{CDCl}_3$ ):  $\delta_{\text{C}}$  19.5, 26.5, 43.9, 52.0, 120.0, 120.5, 123.2, 125.3, 127.8, 129.1, 129.9, 130.0, 131.3, 132.7, 133.3, 135.5, 136.8, 137.0, 142.1, 155.3, 165.2, 166.7.

methyl (*E*)-3-(5-((4-((*tert*-butyldiphenylsilyl)oxy)benzyl)carbamoyl)-[1,1'-biphenyl]-3-yl)acrylate (**12**) To a stirred solution of (**11**) (0.8 g, 1.3 mmol, 1 equiv) in anhydrous toluene (45 mL) was added phenyl boronic acid (0.24 g, 2.0 mmol, 1.5 equiv),  $\text{Pd}(\text{dppf})\text{Cl}_2 \cdot \text{CH}_2\text{Cl}_2$  (0.11 g, 0.13 mmol, 0.1 equiv), and  $\text{Cs}_2\text{CO}_3$  (0.85 g, 2.6 mmol, 2 equiv) and the reaction refluxed overnight under a  $\text{N}_2$  atmosphere. While the reaction mixture was still hot, the contents were filtered, and the filtrate was concentrated in vacuo. The concentrated filtrate was washed with hexane (5x), dissolved in diethyl ether, concentrated in vacuo, washed again with hexane (2x), and concentrated in vacuo. The crude product was purified by flash column chromatography using DCM/MeOH as the eluents to afford the titled compound as a white solid (0.16 g, 18%).  $R_f = 0.30$  (DCM/MeOH = 1:0).  $^1\text{H}$  NMR (400 MHz,  $\text{CDCl}_3$ ):  $\delta_{\text{H}}$  1.12 (9H, s), 3.84 (3H, s), 4.54 (d,  $J = 8.0$  Hz, 2H), 6.40 (t,  $J = 6.0$  Hz, 1H), 6.54 (d,  $J = 16.0$  Hz, 1H), 6.76 (d,  $J = 8.0$  Hz, 2H), 7.10 (d,  $J = 8.0$  Hz, 2H), 7.36-7.50 (9H, m), 7.59 (d,  $J = 8.0$  Hz, 2H), 7.73 (d,  $J = 4.0$  Hz, 5H), 7.78 (d,  $J = 20.0$  Hz, 2H), 7.88 (1H, s), 7.96 (1H, s).  $^{13}\text{C}$  NMR (100 MHz,  $\text{CDCl}_3$ ):  $\delta_{\text{C}}$  19.5, 26.5, 43.8, 51.9, 119.4, 120.0, 125.1, 127.2, 127.3, 127.8, 128.2, 129.0, 129.1, 129.5, 130.0, 130.2, 132.8, 135.4, 135.5, 135.9, 139.5, 142.5, 143.7, 155.3, 166.6, 167.1.

methyl (*E*)-3-(5-((4-hydroxybenzyl)carbamoyl)-[1,1'-biphenyl]-3-yl)acrylate (**13**) To a stirred solution of (**12**) (0.23 g, 0.37 mmol, 1 equiv) in anhydrous THF (5 mL) was added TBAF (1M solution in THF, 0.16 mL, 0.55 mmol, 1.50 equiv) at 0 °C. The reaction was stirred for 40 minutes at 0 °C. Water was added and the solution was extracted with EtOAc and washed with brine. The organic layer was collected, dried over anhydrous  $\text{Na}_2\text{SO}_4$ , filtered, and concentrated in vacuo. The residue was washed with hexane/EtOAc (50:1, 40:1) resulting in solid precipitation. The solid was left in hexane (15 mL) overnight. The solid was then washed with hexane/EtOAc (2x 1:0, 3x 1:1). The overall yield of the titled compound as a white solid was 60% (0.1 g).  $R_f = 0.46$  (hexane/EtOAc = 1:1).  $^1\text{H}$  NMR (400 MHz,  $(\text{CD}_3)_2\text{SO}$ ):  $\delta_{\text{H}}$  3.75 (s, 3H), 4.43 (d,  $J = 4.0$  Hz, 2H), 6.73 (d,  $J = 8.0$  Hz, 2H), 6.83 (d,  $J = 16.0$  Hz, 1H), 7.17 (d,  $J = 8.0$  Hz, 2H), 7.41 (t,  $J = 6.0$  Hz, 1H), 7.49 (t,  $J = 8.0$  Hz, 2H), 7.78 (t,  $J = 8.0$  Hz, 3H), 8.17 (s, 1H), 8.21 (s, 2H), 9.10 (t,  $J = 6.0$  Hz, 1H), 9.34 (s, 1H).  $^{13}\text{C}$  NMR (100 MHz,  $(\text{CD}_3)_2\text{SO}$ ):  $\delta_{\text{C}}$  42.8, 52.1, 115.5, 119.7, 126.0, 127.4, 127.7, 128.6, 129.2, 129.5, 129.8, 130.0, 135.4, 136.1, 139.3, 141.4, 144.3, 156.8, 165.8, 167.1.

methyl(*E*)-3-(5-((4-(prop-2-yn-1-yloxy)benzyl)carbamoyl)-[1,1'-biphenyl]-3-yl)acrylate (**14**)

To a stirred solution of **13** (0.23 g, 0.59 mmol, 1 equiv), in anhydrous DMF was added  $\text{Cs}_2\text{CO}_3$  (0.25 g, 0.78 mmol, 1.31 equiv) and the mixture refluxed under a  $\text{N}_2$  atmosphere. After 10 min, propargyl bromide (0.04 mL, 0.41 mmol, 0.69 equiv) was added. The reaction mixture refluxed for 6 h. The

reaction mixture was filtered, water was added, and the reaction mixture was extracted with EtOAc. The organic layer was collected, dried over anhydrous Na<sub>2</sub>SO<sub>4</sub>, filtered, and concentrated in vacuo. The residue was then extracted with diethyl ether and washed with water. The organic layer was collected, dried over anhydrous Na<sub>2</sub>SO<sub>4</sub>, filtered, and concentrated in vacuo and left to dry at room temperature overnight. The residual DMF was removed by washing with copious amounts of water in toluene, dried over anhydrous Na<sub>2</sub>SO<sub>4</sub>, filtered, and concentrated in vacuo to afford the titled compound as a white solid (0.19 g, 75%). R<sub>f</sub> = 0.75 (hexane/EtOAc = 1:1)

<sup>1</sup>H NMR (400 MHz, CDCl<sub>3</sub>): δ<sub>H</sub> 2.53 (t, *J* = 2.4 Hz, 1H), 3.82 (3H, s), 4.61 (d, *J* = 8.0 Hz, 2H), 4.69 (d, *J* = 4.0 Hz, 2H), 6.53 (d, *J* = 16.0 Hz, 1H), 6.65 (t, *J* = 4.0 Hz, 1H), 6.97 (d, *J* = 8.0 Hz, 2H), 7.32 (d, *J* = 8.0 Hz, 2H), 7.39-7.43 (m, 1H), 7.45-7.49 (m, 2H), 7.59 (d, *J* = 4.0 Hz, 2H), 7.73 (d, *J* = 16.0 Hz, 1H), 7.82 (t, *J* = 1.4 Hz, 1H), 7.90 (t, *J* = 1.4 Hz, 1H), 7.99 (t, *J* = 1.6 Hz, 1H). <sup>13</sup>C NMR (100 MHz, CDCl<sub>3</sub>): δ<sub>C</sub> 43.8, 51.9, 55.9, 75.6, 78.5, 115.2, 119.4, 125.1, 127.2, 127.4, 128.2, 129.0, 129.4, 129.6, 131.0, 135.4, 135.8, 139.5, 142.5, 143.7, 157.1, 166.7, 167.1.

(*E*)-3-(5-((4-Methylbenzyl)carbamoyl)-[1,1'-biphenyl]-3-yl)acrylic acid (**3**) The titled compound was afforded as a white solid (68 mg, 71%). <sup>1</sup>H NMR (400 MHz, (CD<sub>3</sub>)<sub>2</sub>SO): δ<sub>H</sub> 2.29 (3H, s), 4.49 (d, *J* = 5.6 Hz, 2H), 6.74 (d, *J* = 16.0 Hz, 1H), 7.15 (d, *J* = 8.0 Hz, 2H), 7.25 (d, *J* = 8.0 Hz, 2H), 7.43 (t, *J* = 7.2 Hz, 1H), 7.52 (t, *J* = 7.6 Hz, 2H), 7.72 (d, *J* = 16.0 Hz, 1H), 7.81 (d, *J* = 7.2 Hz, 2H), 8.15 (1H, s), 8.20 (2H, s), 9.18 (t, *J* = 5.6 Hz, 1H). <sup>13</sup>C NMR (100 MHz, (CD<sub>3</sub>)<sub>2</sub>SO): δ<sub>C</sub> 21.14, 42.99, 121.45, 125.79, 127.46, 127.81, 128.53, 129.34, 129.46, 129.76, 135.74, 135.95, 136.35, 136.88, 137.03, 139.40, 141.43, 143.45, 165.90, 168.01. ESI-HRMS (*m/z*): [M+H]<sup>+</sup> calcd for C<sub>24</sub>H<sub>22</sub>NO<sub>3</sub>, 372.1594; found, 372.1595.

*tert*-butyl 2-(2-(2-azidoethoxy)ethoxy)acetate (**16**) Following a modified literature procedure<sup>1</sup>: Under a N<sub>2</sub> atmosphere, to a stirred solution of NaH (60% dispersion in mineral oil, 0.59 g, 14.87 mmol, 1.51 equiv) in anhydrous THF (35 mL) was added a stirred solution of 2-(2-azidoethoxy)ethanol (**15**) (1.29 g, 9.85 mmol, 1 equiv) in anhydrous THF (69 mL) at 0 °C. After the reaction mixture stirred for 30 min at 0 °C, *tert*-butyl bromoacetate (2.88 mL, 19.69 mmol, 2 equiv) was added. The mixture stirred for 24 hr at room temperature under a N<sub>2</sub> atmosphere. The reaction mixture was quenched with water (350 mL) and when the effervescence ceased the solution was extracted with EtOAc. The organic layer was collected, dried over anhydrous Na<sub>2</sub>SO<sub>4</sub>, filtered, and concentrated in vacuo. The crude product was purified by flash column chromatography using Toluene/EtOAc as the eluents to afford the titled compound as a yellow oil (0.72 g, 30%). R<sub>f</sub> = 0.29 (Toluene/EtOAc = 1:0). <sup>1</sup>H NMR (400 MHz, CDCl<sub>3</sub>): δ<sub>H</sub> 1.48 (9H, s), 3.39 (t, *J* = 6.0 Hz, 2H), 3.68-3.75 (6H, m), 4.04 (2H, s). <sup>13</sup>C NMR (100 MHz, CDCl<sub>3</sub>): δ<sub>C</sub> 28.1, 50.7, 69.1, 70.0, 70.7, 70.8, 81.6, 169.6.

Following a modified literature procedure<sup>2</sup>: To a stirred solution of **16** (0.26 g, 1.06 mmol, 1 equiv) in DCM (0.51 mL) was added TFA (0.25 mL) and the reaction stirred at room temperature for 2 h under a N<sub>2</sub> atmosphere. The reaction mixture was then concentrated in vacuo. At 0° C, the reaction mixture was diluted with DCM (1.30 mL) followed by dropwise addition of SOCl<sub>2</sub>. The reaction stirred at room temperature for 2 h under a N<sub>2</sub> atmosphere. The solvent was concentrated in vacuo to afford **17** (dark brown oil) which was used in the following steps without purification.

2-(2-(2-azidoethoxy)ethoxy)-*N*-(2-(2,6-dioxopiperidin-3-yl)-1-oxoisindolin-4-yl)acetamide (**18**) To solution **17** was added NMP (2.57 mL) and the cereblon ligand (lenalidomide) (0.16 g, 0.63 mmol, 0.5 equiv). The reaction mixture stirred at room temperature overnight under a N<sub>2</sub> atmosphere. Water was added and the solution was extracted with EtOAc and washed with brine. The organic layer was collected, dried over anhydrous Na<sub>2</sub>SO<sub>4</sub>, filtered, and concentrated in vacuo. The crude product was purified by flash column chromatography using DCM/MeOH as the eluents to afford the titled compound as an off white solid (0.18 g, 37%). R<sub>f</sub> = 0.47 (DCM/MeOH = 14:1). <sup>1</sup>H NMR (400 MHz, CDCl<sub>3</sub>): δ<sub>H</sub> 2.18-2.22 (1H, m), 2.35-2.40 (1H, m), 2.81-2.86 (2H, m), 3.38 (t, *J* = 4.0 Hz, 2H), 3.71-3.76 (4H, m), 3.81-3.83 (2H, m), 4.19 (2H, s), 4.46 (2H, s), 5.20-5.25 (1H, m), 7.49 (t, *J* = 16.0 Hz, 1H), 7.67 (d, *J* = 8.0

Hz, 1H), 7.76 (d,  $J = 8.0$  Hz, 1H), 8.52 (1H, s), 8.71 (1H, s).  $^{13}\text{C}$  NMR (100 MHz,  $\text{CDCl}_3$ ):  $\delta_{\text{C}}$  23.3, 31.5, 46.5, 50.5, 51.9, 70.1, 70.1, 70.5, 71.1, 121.6, 126.3, 129.2, 131.8, 132.9, 134.7, 168.1, 168.9, 169.7, 171.4.

methyl (*E*)-3-(5-((4-((1-(2-(2-(2-((2-(2,6-dioxopiperidin-3-yl)-1-oxoisindolin-4-yl)amino)-2-oxoethoxy)ethoxy)ethyl)-1*H*-1,2,3-triazol-4-yl)methoxy)benzyl)carbamoyl)-[1,1'-biphenyl]-3-yl)acrylate (**19**) **14** (0.150 g, 0.35 mmol, 1 equiv) and **18** (0.150 g, 0.35 mmol, 1 equiv) were dissolved in a solution of DCM (2.61 mL), MeOH (2.61 mL), and water (1.31 mL). To which  $\text{CuSO}_4 \cdot 5\text{H}_2\text{O}$  (8.8 mg, 0.03 mmol, 0.1 equiv) dissolved in water (6.53 mL) was added and the reaction mixture stirred under a  $\text{N}_2$  atmosphere for 5 min at room temperature. Sodium ascorbate (28.5 mg, 0.14 mmol, 0.41 equiv) was dissolved in water (6.53 mL) and added to the reaction mixture. The reaction stirred overnight at room temperature under a  $\text{N}_2$  atmosphere. Water was added (13 mL) and the solution was extracted with EtOAc. The organic layer was collected, dried over anhydrous  $\text{Na}_2\text{SO}_4$ , filtered, and concentrated in vacuo. The crude product was purified by flash column chromatography using DCM/MeOH as the eluents to afford the titled compound as a white solid (47.9 mgs, 16%).  $R_f = 0.25$  (DCM/MeOH = 20:1).  $^1\text{H}$  NMR (400 MHz,  $\text{CD}_3\text{OD}$ ):  $\delta_{\text{H}}$  1.31 (1H, s), 2.08-2.14 (1H, m), 2.33-2.44 (1H, m), 2.71-2.89 (2H, m), 3.69 (4H, s), 3.81 (d,  $J = 4.0$  Hz, 3H), 3.94 (t,  $J = 8.0$  Hz, 2H), 4.10 (d,  $J = 4.0$  Hz, 2H), 4.44 (d,  $J = 4.0$  Hz, 2H), 4.50 (d,  $J = 8.0$  Hz, 1H), 4.54 (1H, s), 4.59-4.61 (4H, m), 5.06 (2H, s), 5.09-5.18 (2H, m), 6.69 (d,  $J = 16.0$  Hz, 1H), 6.90 (d,  $J = 8.0$  Hz, 2H), 7.27 (d,  $J = 8.0$  Hz, 2H), 7.39 (t,  $J = 6.0$  Hz, 1H), 7.47 (t,  $J = 16.0$  Hz, 2H), 7.62-7.73 (4H, m), 7.80 (d,  $J = 16.0$  Hz, 1H), 8.00 (1H, s), 8.06 (1H, s), 8.11 (1H, s), 8.17 (1H, s).  $^{13}\text{C}$  NMR (100 MHz,  $\text{CD}_3\text{OD}$ ):  $\delta_{\text{C}}$  22.7, 30.9, 42.7, 49.8, 50.9, 52.2, 60.9, 68.9, 69.7, 69.9, 70.5, 114.5, 118.9, 120.5, 124.7, 125.0, 126.7, 126.8, 127.3, 127.8, 128.7, 128.7, 129.4, 131.3, 132.2, 132.6, 135.3, 135.4, 135.5, 139.4, 142.3, 143.5, 143.8, 157.4, 167.4, 167.7, 169.5, 169.5, 170.6, 173.2.

(*E*)-3-(5-((4-((1-(2-(2-(2-((2-(2,6-dioxopiperidin-3-yl)-1-oxoisindolin-4-yl)amino)-2-oxoethoxy)ethoxy)ethyl)-1*H*-1,2,3-triazol-4-yl)methoxy)benzyl)carbamoyl)-[1,1'-biphenyl]-3-yl)acrylic acid (**5**) To a stirred solution of **19** (41 mg, 0.05 mmol, 1 equiv) in a mixture of THF/MeOH (1:1) (2 mL) was added aqueous 1N NaOH (5 mg, 0.14 mmol, 3 equiv) solution. The mixture was stirred at 56 °C for 2 hours. The solvent was concentrated in vacuo, and pH was adjusted to 2-5 with 1 N HCl solution. The solution was extracted with EtOAc. The organic layer was collected, dried over anhydrous  $\text{Na}_2\text{SO}_4$ , filtered, and concentrated in vacuo. The precipitate was air-dried to afford the titled compound as a colorless semi-solid (19.3 mgs, 48%).  $R_f = 0.13$  (Hexane/EtOAc = 1:1).  $^1\text{H}$  NMR (400 MHz,  $\text{CD}_3\text{OD}$ ):  $\delta_{\text{H}}$  2.14-2.48 (4H, m), 3.70 (5H, br. s), 3.95-3.99 (2H, m), 4.10-4.12 (2H, m), 4.54 (2H, s), 4.60-4.63 (2H, m), 4.94-4.98 (2H, m), 5.07 (2H, s), 6.65-6.75 (1H, m), 6.92 (d,  $J = 8.8$  Hz, 2H), 7.29 (d,  $J = 7.6$  Hz, 2H), 7.41 (t,  $J = 6.8$  Hz, 1H), 7.47-7.51 (3H, m), 7.63 (d,  $J = 7.2$  Hz, 1H), 7.73 (d,  $J = 7.6$  Hz, 3H), 7.79-7.84 (1H, m), 8.01 (1H, s), 8.09 (d,  $J = 5.2$  Hz, 1H), 8.12 (d,  $J = 1.6$  Hz, 1H), 8.17-8.18 (1H, m).  $^{13}\text{C}$  NMR (150 MHz,  $\text{CD}_3\text{OD}$ ):  $\delta_{\text{C}}$  15.5, 15.6, 16.7, 24.4, 24.9, 27.9, 28.6, 28.9, 29.5, 29.8, 31.3, 42.3, 45.9, 48.9, 49.4, 53.4, 53.6, 55.4, 55.6, 55.7, 60.4, 68.4, 69.3, 69.5, 70.0, 114.1, 119.5, 119.9, 124.2, 124.5, 126.0, 126.3, 126.3, 126.7, 127.3, 128.1, 128.2, 128.9, 130.8, 131.7, 132.1, 132.2, 134.8, 135.0, 135.1, 139.0, 141.8, 143.1, 143.1, 157.0, 167.3, 168.2, 169.1, 172.6, 174.2, 175.4. ESI-HRMS ( $m/z$ ):  $[\text{M} + \text{H}]^+$  calcd for  $\text{C}_{45}\text{H}_{43}\text{N}_7\text{O}_{10}$ , 842.3144; found 842.3143.

## Supplementary References:

1. Wan, Z.; Li, Y.; Bo, S.; Gao, M.; Wang, X.; Zeng, K.; Tao, X.; Li, X.; Yang, Z.; Jiang, Z.-X. Amide bond-containing monodisperse polyethylene glycols beyond 10 000 Da. *Org. Biomol. Chem.* **2016**, *14*, 7912.
2. Zhang, F.; Wu, Z.; Chen, P.; Zhang, J.; Wang, T.; Zhou, J.; Zhang, H. Discovery of a new class of PROTAC BRD4 degraders based on a dihydroquinazolinone derivative and lenalidomide/pomalidomide. *Biorg. Med. Chem.* **2020**, *28*, 115228.

<sup>1</sup>H NMR (400 MHz, CDCl<sub>3</sub>), (4-((*tert*-butyldiphenylsilyloxy)phenyl)methanamine (8)

AVC-74  
CDCl<sub>3</sub>

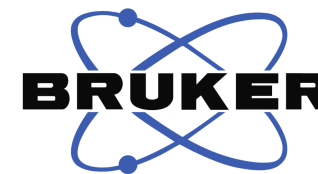

Current Data Parameters  
NAME Oct04-2021-PTlab  
EXPNO 10  
PROCNO 1

F2 - Acquisition Parameters  
Date\_ 20211004  
Time 14.14  
INSTRUM spect  
PROBHD 5 mm PABBO BB/  
PULPROG zg30  
TD 30046  
SOLVENT CDCl<sub>3</sub>  
NS 16  
DS 1  
SWH 8012.820 Hz  
FIDRES 0.266685 Hz  
AQ 1.8748704 sec  
RG 57  
DW 62.400 usec  
DE 6.50 usec  
TE 300.1 K  
D1 6.00000000 sec  
TD0 1

===== CHANNEL f1 =====  
SFO1 400.2821952 MHz  
NUC1 1H  
P1 10.86 usec  
PLW1 17.00000000 W

F2 - Processing parameters  
SI 131072  
SF 400.2800000 MHz  
WDW EM  
SSB 0  
LB 0.20 Hz  
GB 0  
PC 1.00

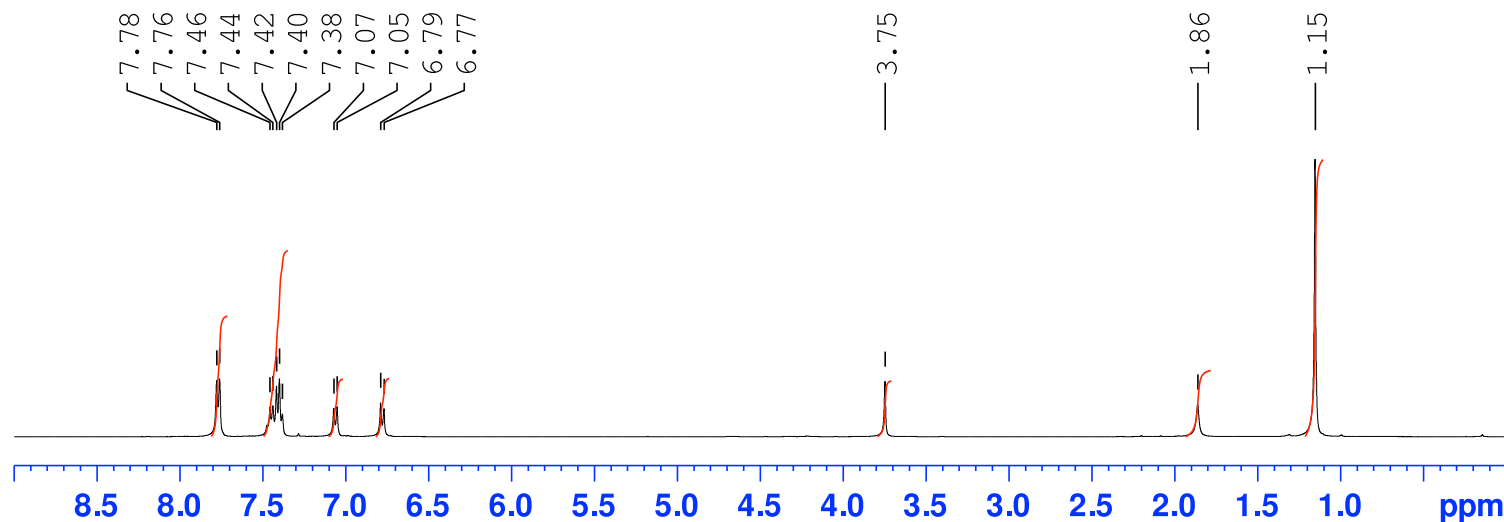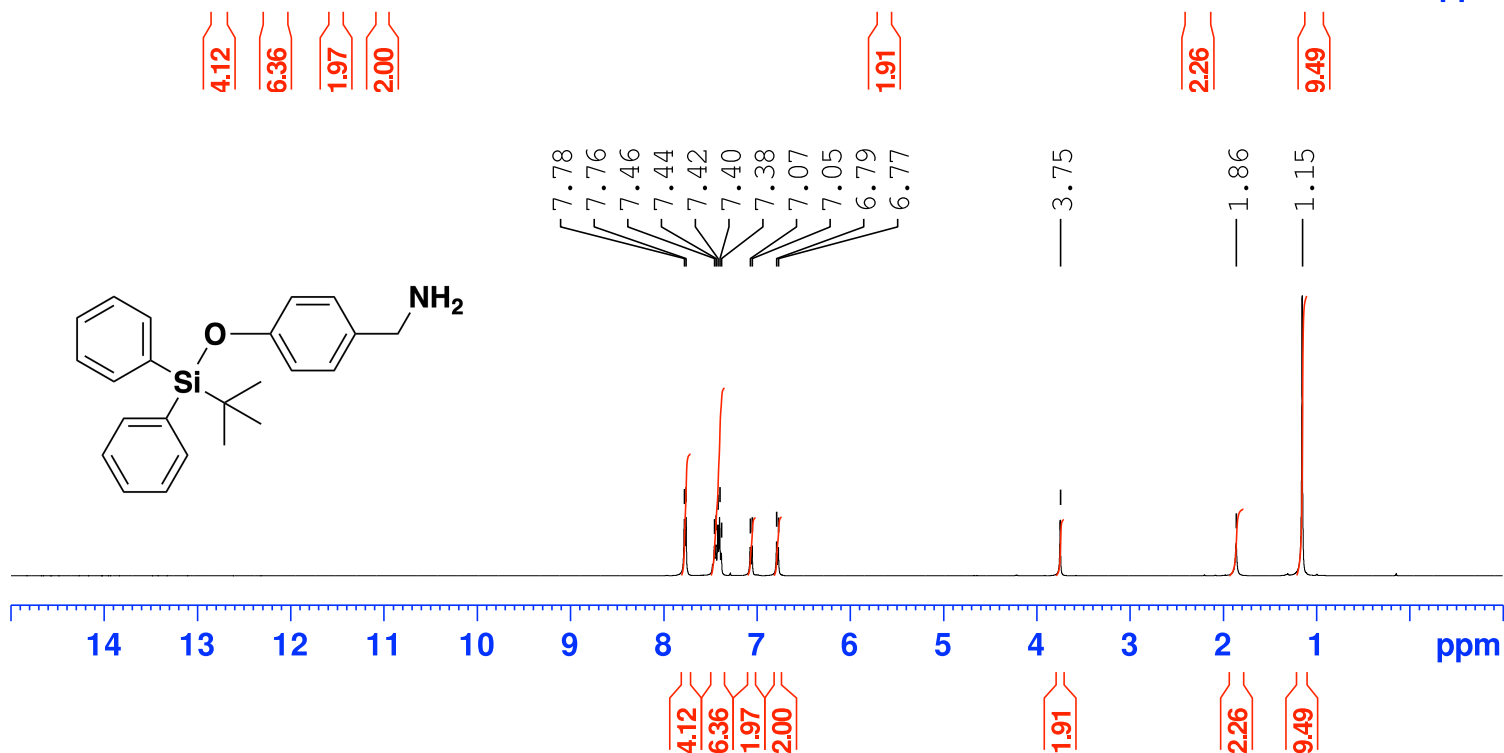

<sup>13</sup>C NMR (100 MHz, CDCl<sub>3</sub>), (4-((*tert*-butyldiphenylsilyl)oxy)phenyl)methanamine (**8**)

AVC-74  
CDCl<sub>3</sub>

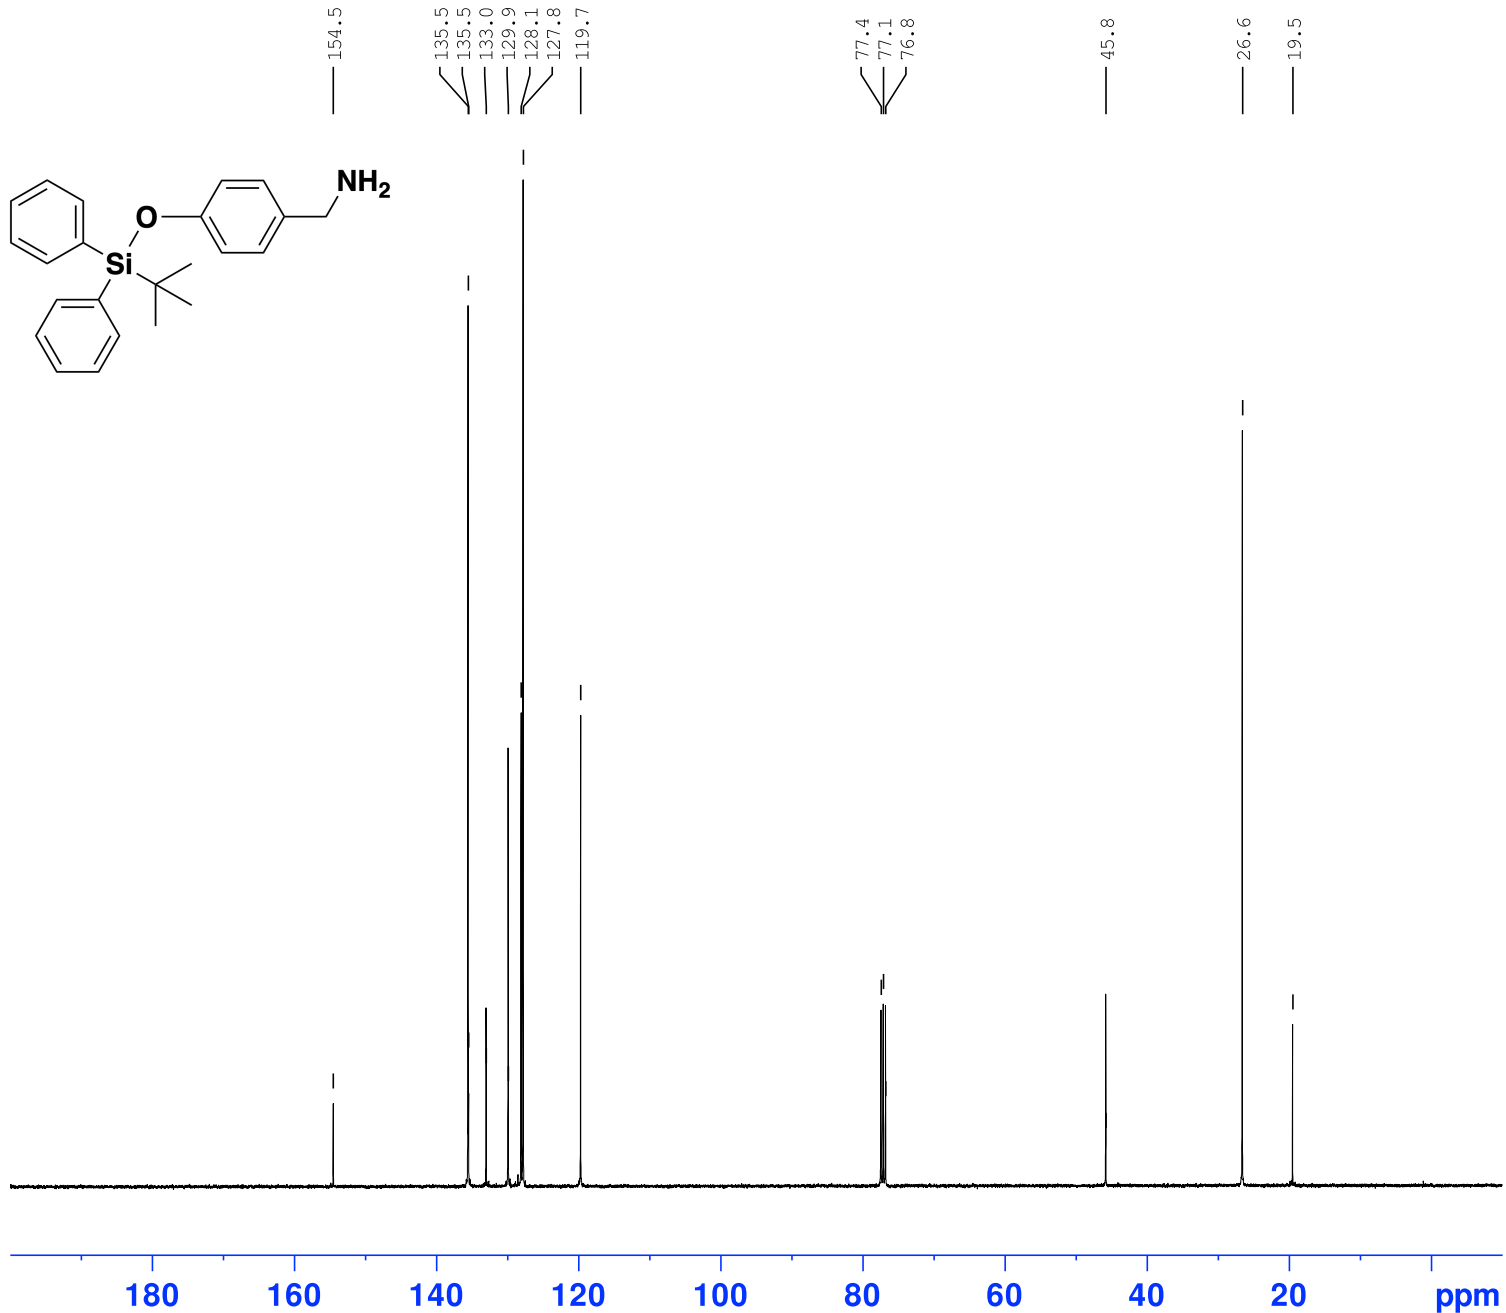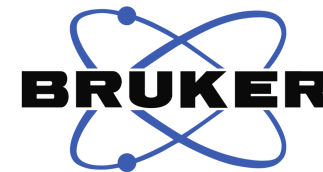

Current Data Parameters  
NAME Oct04-2021-PTlab  
EXPNO 11  
PROCNO 1

F2 - Acquisition Parameters  
Date\_ 20211004  
Time 14.58  
INSTRUM spect  
PROBHD 5 mm PABBO BB/  
PULPROG zgpg30  
TD 65536  
SOLVENT CDCl<sub>3</sub>  
NS 512  
DS 4  
SWH 24038.461 Hz  
FIDRES 0.366798 Hz  
AQ 1.3631488 sec  
RG 2050  
DW 20.800 usec  
DE 6.50 usec  
TE 300.0 K  
D1 2.00000000 sec  
D11 0.03000000 sec  
TD0 1

=====  
CHANNEL f1  
SFO1 100.6605506 MHz  
NUC1 13C  
P1 11.00 usec  
PLW1 48.00000000 W

=====  
CHANNEL f2  
SFO2 400.2816011 MHz  
NUC2 1H  
CPDPRG[2] waltz16  
PCPD2 90.00 usec  
PLW2 17.00000000 W  
PLW12 0.24753000 W  
PLW13 0.20050000 W

F2 - Processing parameters  
SI 32768  
SF 100.6504861 MHz  
WDW EM  
SSB 0  
LB 1.00 Hz  
GB 0  
PC 1.40

<sup>1</sup>H NMR (400 MHz, CDCl<sub>3</sub>), 3-bromo-N-(4-((*tert*-butyldiphenylsilyloxy)benzyl)-5-iodobenzamide (10)

AVC-76  
CDCl<sub>3</sub>

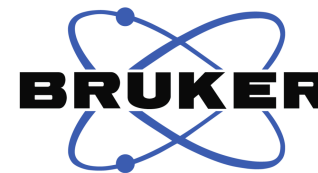

Current Data Parameters  
NAME Oct11-2021-PT1lab  
EXPNO 10  
PROCNO 1

F2 - Acquisition Parameters  
Date\_ 20211011  
Time 9.52  
INSTRUM spect  
PROBHD 5 mm PABBO BB/  
PULPROG zg30  
TD 30046  
SOLVENT CDCl<sub>3</sub>  
NS 16  
DS 1  
SWH 8012.820 Hz  
FIDRES 0.266685 Hz  
AQ 1.8748704 sec  
RG 101  
DW 62.400 usec  
DE 6.50 usec  
TE 300.1 K  
D1 6.00000000 sec  
TD0 1

===== CHANNEL f1 =====  
SFO1 400.2821952 MHz  
NUC1 1H  
P1 10.86 usec  
PLW1 17.00000000 W

F2 - Processing parameters  
SI 131072  
SF 400.2800000 MHz  
WDW EM  
SSB 0  
LB 0.20 Hz  
GB 0  
PC 1.00

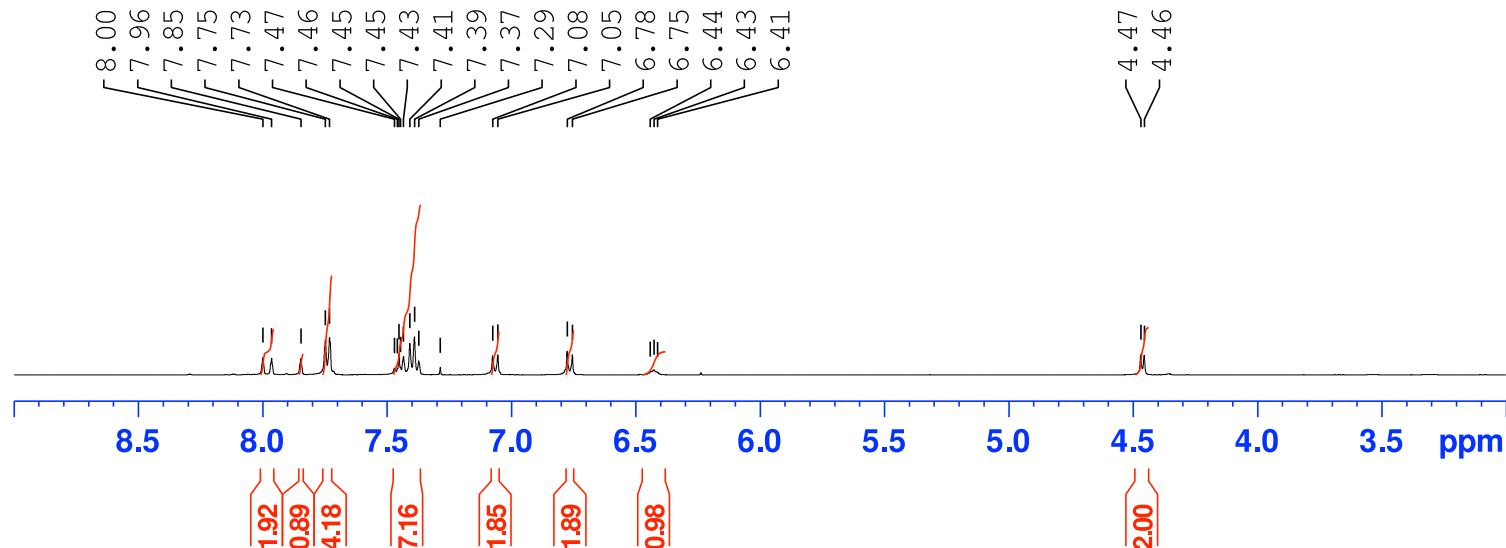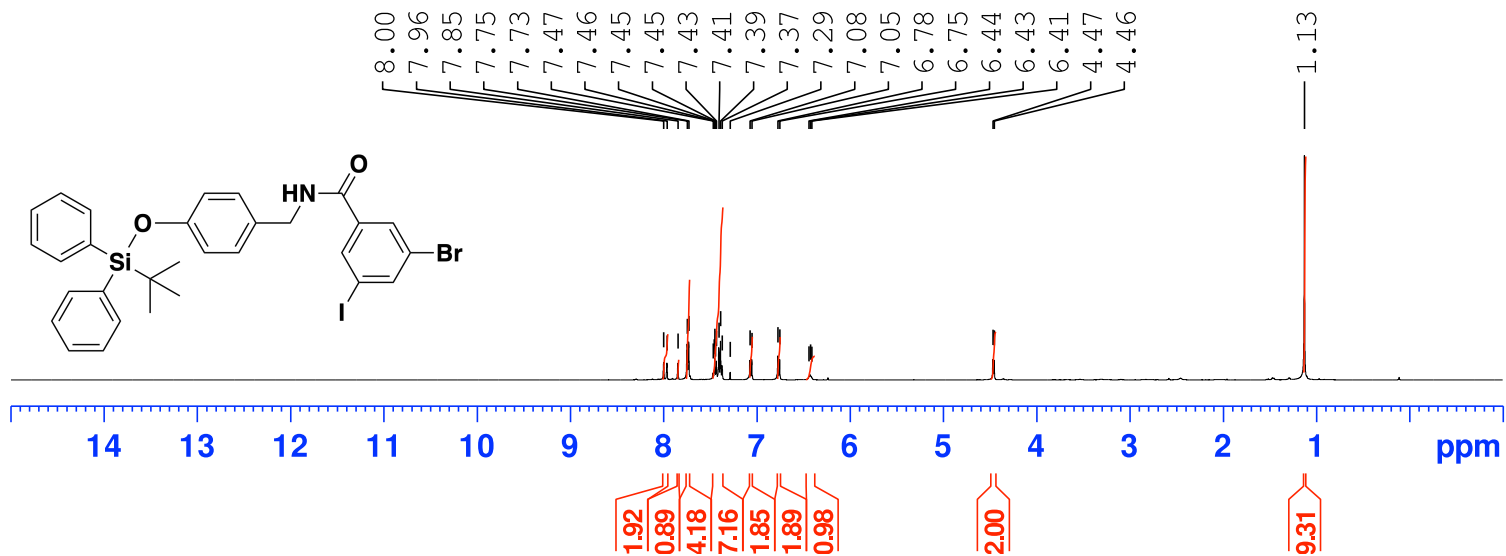



<sup>13</sup>C NMR (100 MHz, CDCl<sub>3</sub>), 3-bromo-N-(4-((*tert*-butyldiphenylsilyl)oxy)benzyl)-5-iodobenzamide (10)

AVC-76  
CDCl<sub>3</sub>

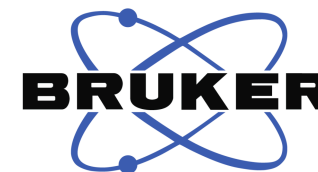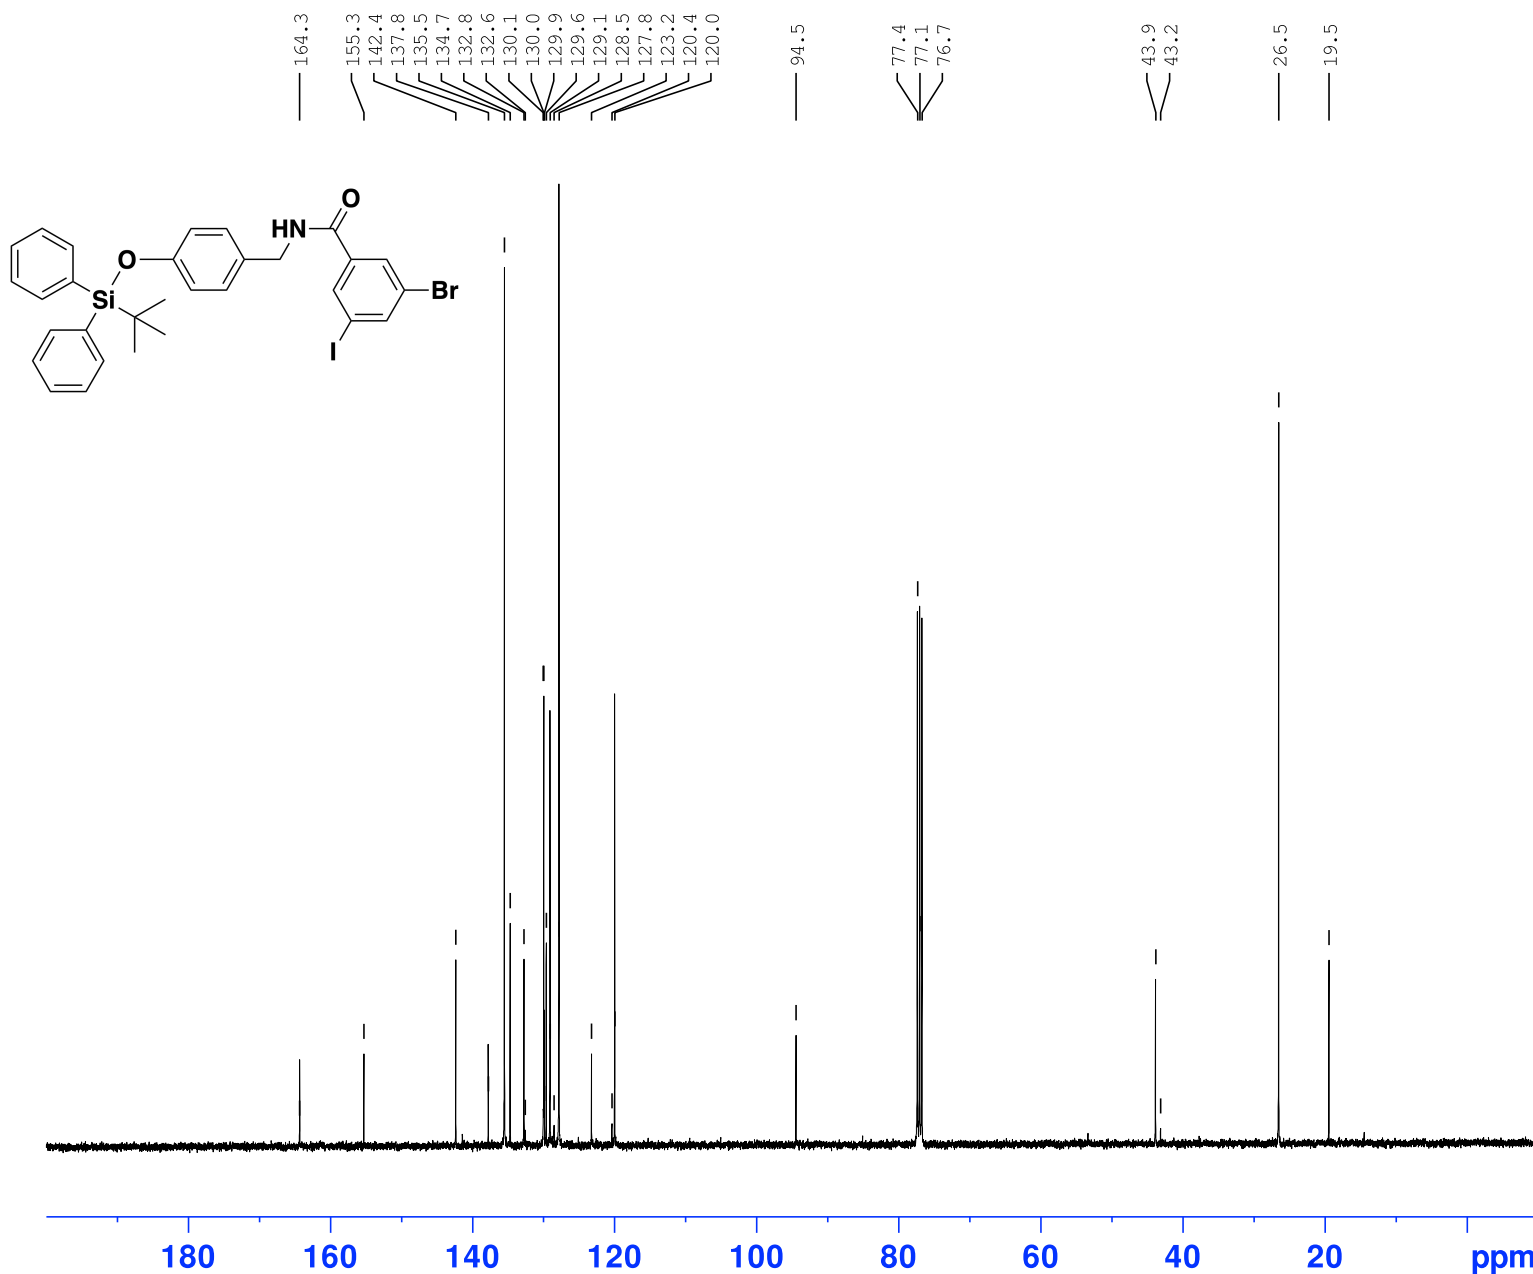

Current Data Parameters  
NAME Oct11-2021-PTlab  
EXPNO 11  
PROCNO 1

F2 - Acquisition Parameters  
Date\_ 20211011  
Time 10.30  
INSTRUM spect  
PROBHD 5 mm PABBO BB/  
PULPROG zgpg30  
TD 65536  
SOLVENT CDCl<sub>3</sub>  
NS 512  
DS 4  
SWH 24038.461 Hz  
FIDRES 0.366798 Hz  
AQ 1.3631488 sec  
RG 2050  
DW 20.800 usec  
DE 6.50 usec  
TE 300.1 K  
D1 2.0000000 sec  
D11 0.0300000 sec  
TD0 1

==== CHANNEL f1 =====  
SFO1 100.6605506 MHz  
NUC1 13C  
P1 11.00 usec  
PLW1 48.0000000 W

==== CHANNEL f2 =====  
SFO2 400.2816011 MHz  
NUC2 1H  
CPDPRG[2] waltz16  
PCPD2 90.00 usec  
PLW2 17.0000000 W  
PLW12 0.24753000 W  
PLW13 0.20050000 W

F2 - Processing parameters  
SI 32768  
SF 100.6504861 MHz  
WDW EM  
SSB 0  
LB 1.00 Hz  
GB 0  
PC 1.40

<sup>1</sup>H NMR (400 MHz, CDCl<sub>3</sub>), Methyl (*E*)-3-(3-bromo-5-((4-((*tert*-butyldiphenylsilyloxy)benzyl)carbamoyl)phenyl)acrylate) (**11**)

AVC-98 (F1)  
CDCl<sub>3</sub>

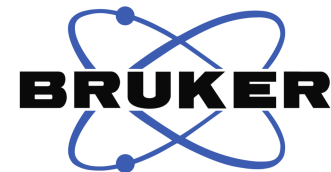

Current Data Parameters  
NAME Dec13-2021-PTlab  
EXPNO 10  
PROCNO 1

F2 - Acquisition Parameters  
Date\_ 20211213  
Time 10.29  
INSTRUM spect  
PROBHD 5 mm PABBO BB/  
PULPROG zg30  
TD 30046  
SOLVENT CDCl<sub>3</sub>  
NS 16  
DS 1  
SWH 8012.820 Hz  
FIDRES 0.266685 Hz  
AQ 1.8748704 sec  
RG 114  
DW 62.400 usec  
DE 6.50 usec  
TE 300.0 K  
D1 6.00000000 sec  
TD0 1

===== CHANNEL f1 =====  
SFO1 400.2821952 MHz  
NUC1 1H  
P1 10.86 usec  
PLW1 17.00000000 W

F2 - Processing parameters  
SI 131072  
SF 400.2800103 MHz  
WDW EM  
SSB 0  
LB 0.20 Hz  
GB 0  
PC 1.00

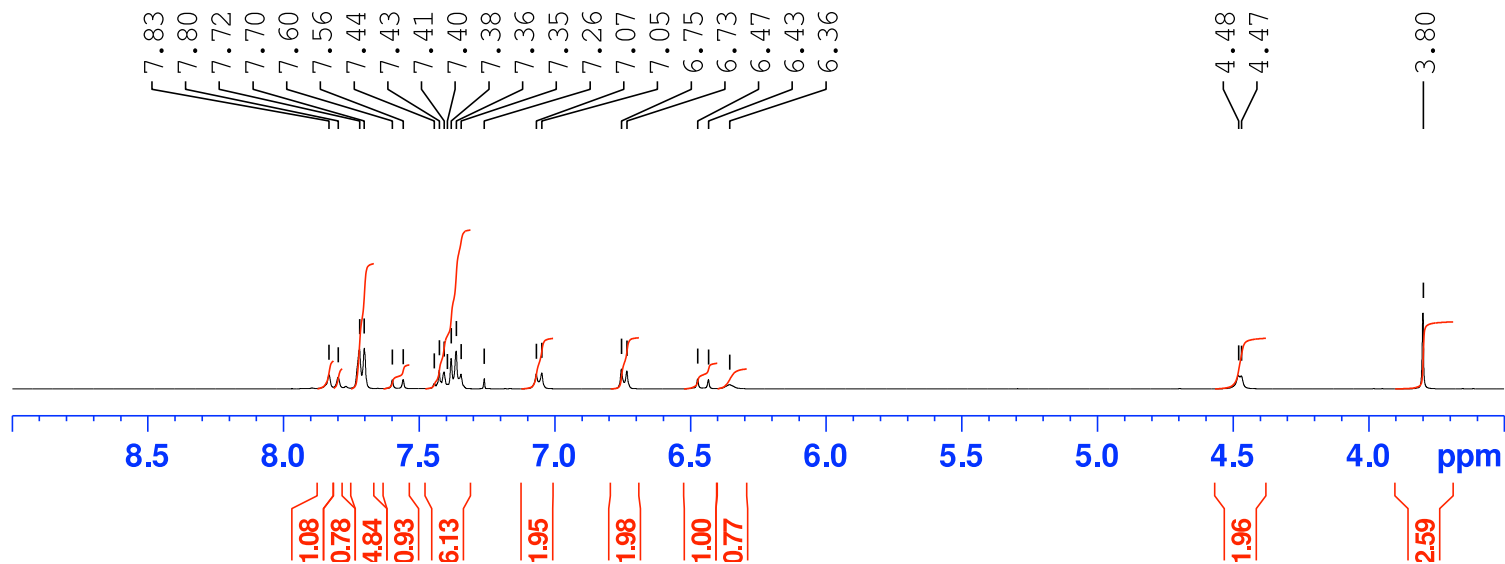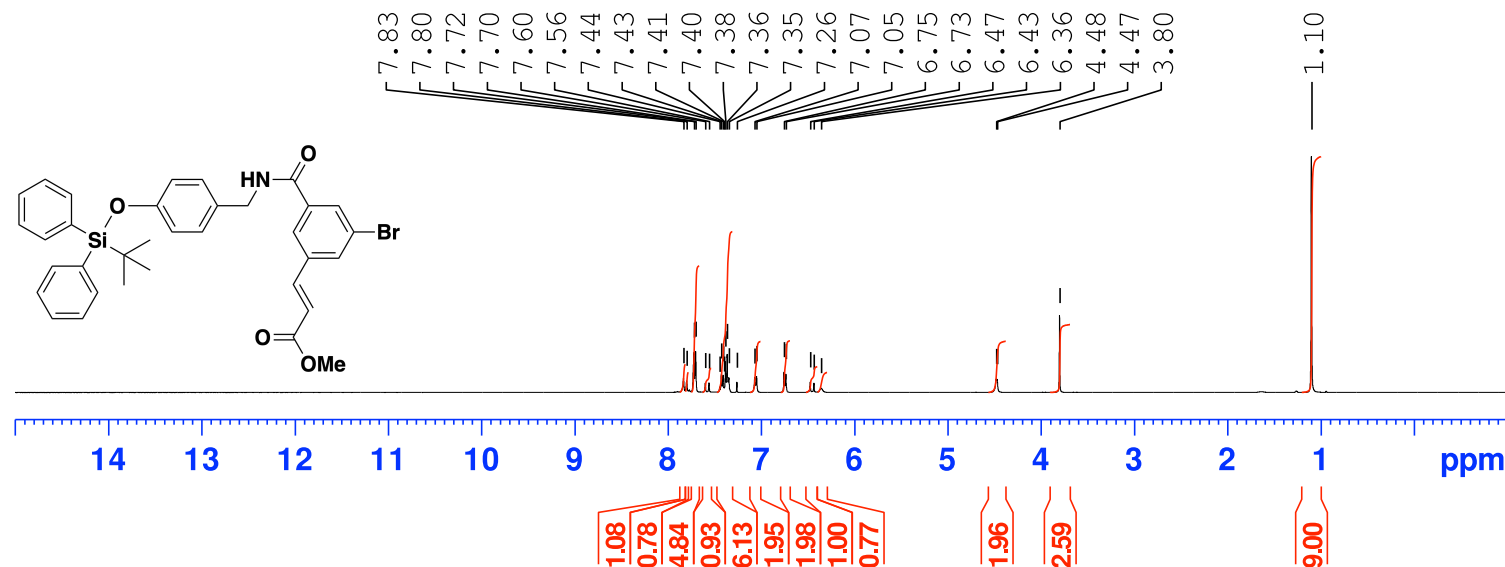

<sup>13</sup>C NMR (100 MHz, CDCl<sub>3</sub>), Methyl (*E*)-3-(3-bromo-5-((4-((*tert*-butyldiphenylsilyloxy)benzyl)carbamoyl)phenyl)acrylate) (11)

AVC-98 (F1)  
CDCl<sub>3</sub>

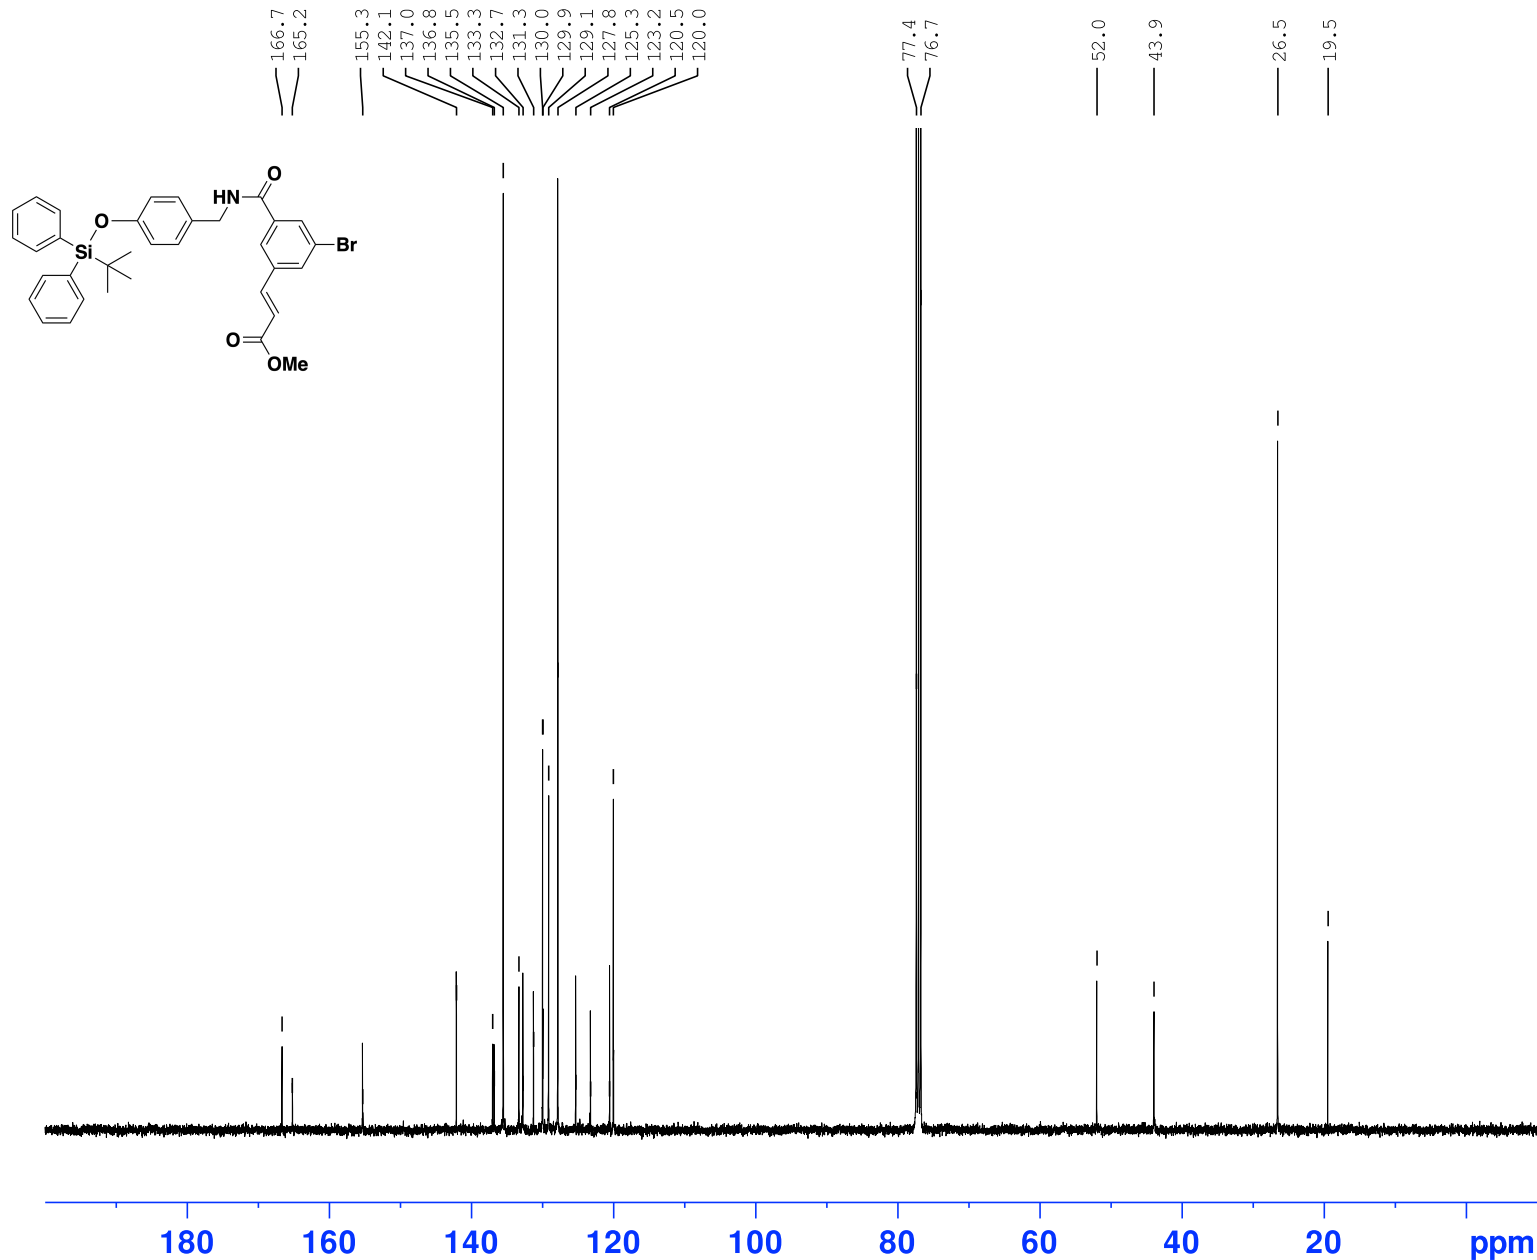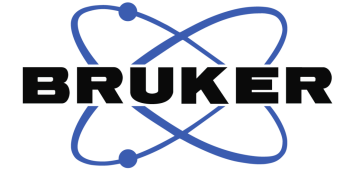

Current Data Parameters  
NAME Dec13-2021-PT1lab  
EXPNO 30  
PROCNO 1

F2 - Acquisition Parameters  
Date\_ 20211213  
Time 13.50  
INSTRUM spect  
PROBHD 5 mm PABBO BB/  
PULPROG zgpg30  
TD 65536  
SOLVENT CDCl<sub>3</sub>  
NS 512  
DS 4  
SWH 24038.461 Hz  
FIDRES 0.366798 Hz  
AQ 1.3631488 sec  
RG 2050  
DW 20.800 usec  
DE 6.50 usec  
TE 300.0 K  
D1 2.00000000 sec  
D11 0.03000000 sec  
TD0 1

===== CHANNEL f1 =====  
SFO1 100.6605506 MHz  
NUC1 13C  
P1 11.00 usec  
PLW1 48.00000000 W

===== CHANNEL f2 =====  
SFO2 400.2816011 MHz  
NUC2 1H  
CPDPRG[2] waltz16  
PCPD2 90.00 usec  
PLW2 17.00000000 W  
PLW12 0.24753000 W  
PLW13 0.20050000 W

F2 - Processing parameters  
SI 32768  
SF 100.6504861 MHz  
WDW EM  
SSB 0  
LB 1.00 Hz  
GB 0  
PC 1.40

<sup>1</sup>H NMR (400 MHz, CDCl<sub>3</sub>), Methyl (E)-3-(5-((*tert*-butyldiphenylsilyloxy)benzyl)carbamoyl)-[1,1'-biphenyl]-3-yl)acrylate (**12**)

AVC-122 (F2)  
CDCl<sub>3</sub>

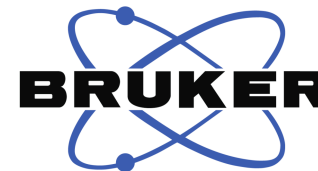

Current Data Parameters  
NAME Mar11-2022-PTlab  
EXPNO 40  
PROCNO 1

F2 - Acquisition Parameters  
Date\_ 20220311  
Time 15.35  
INSTRUM spect  
PROBHD 5 mm PABBO BB/  
PULPROG zg30  
TD 30046  
SOLVENT CDCl<sub>3</sub>  
NS 16  
DS 1  
SWH 8012.820 Hz  
FIDRES 0.266685 Hz  
AQ 1.8748704 sec  
RG 256  
DW 62.400 usec  
DE 6.50 usec  
TE 300.1 K  
D1 6.00000000 sec  
TD0 1

===== CHANNEL f1 =====  
SFO1 400.2821952 MHz  
NUC1 1H  
P1 10.86 usec  
PLW1 17.00000000 W

F2 - Processing parameters  
SI 131072  
SF 400.2800000 MHz  
WDW EM  
SSB 0  
LB 0.20 Hz  
GB 0  
PC 1.00

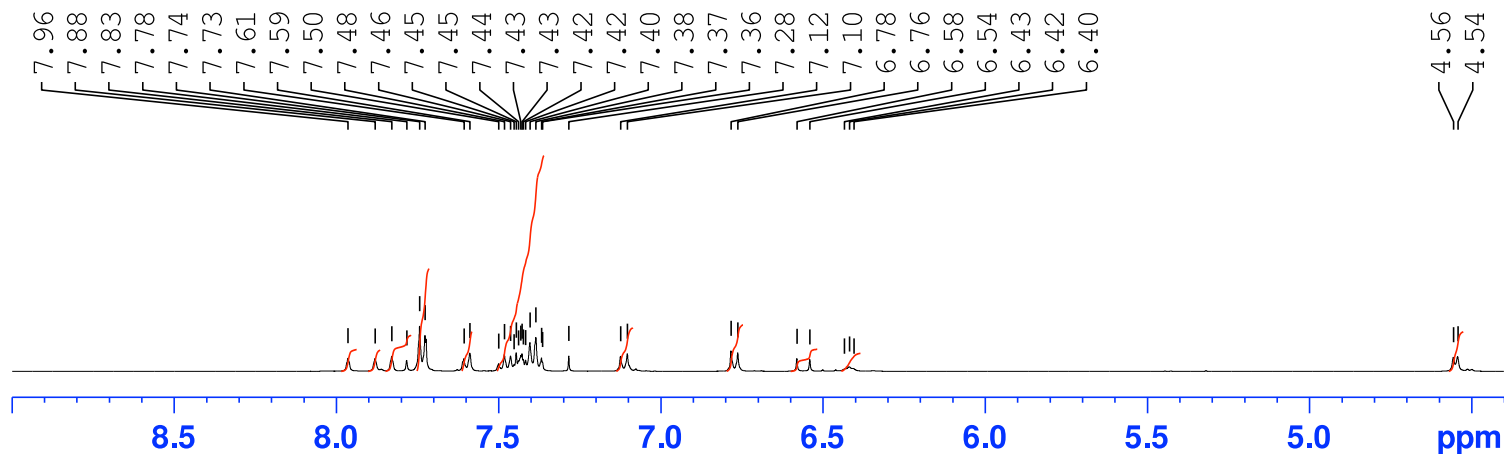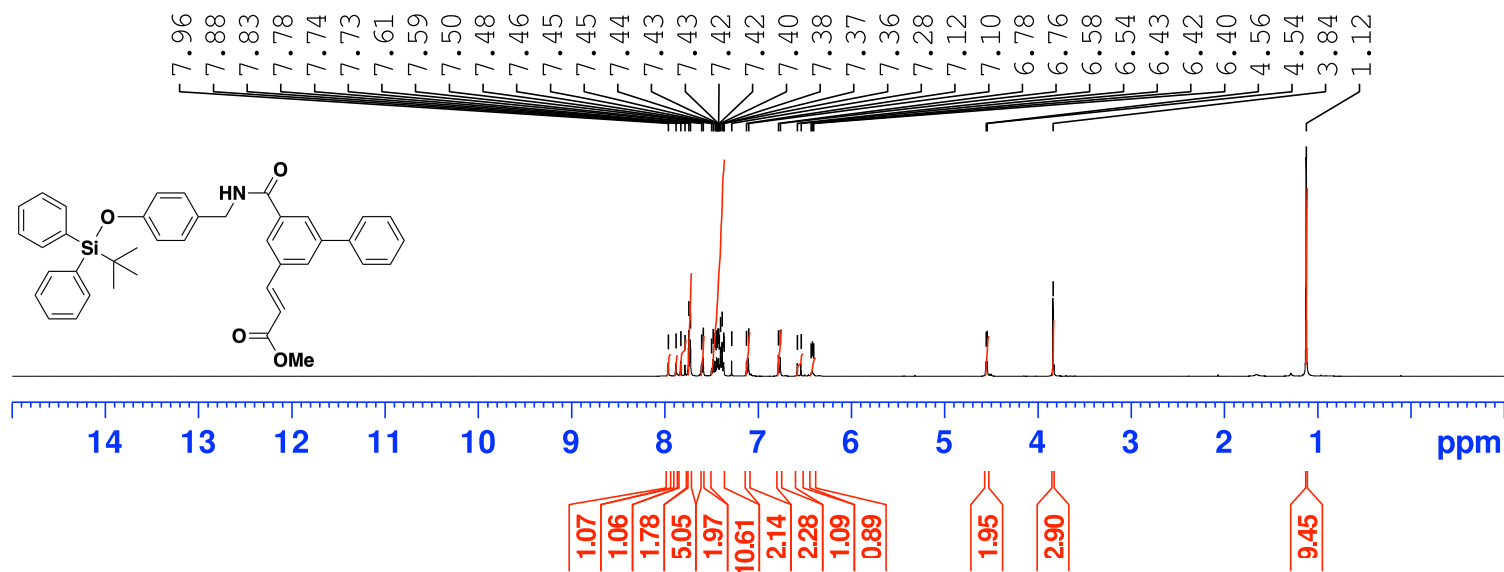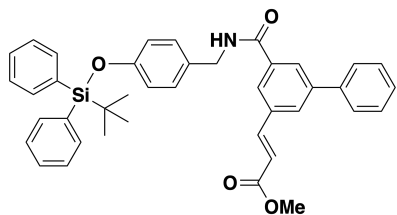

<sup>13</sup>C NMR (100 MHz, CDCl<sub>3</sub>), Methyl (*E*)-3-(5-((4-((*tert*-butyldiphenylsilyloxy)benzyl)carbamoyl)-[1,1'-biphenyl]-3-yl)acrylate (**12**)

AVC-122 (F2)  
CDCl<sub>3</sub>

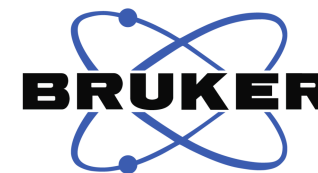

Current Data Parameters  
NAME Mar11-2022-PTlab  
EXPNO 41  
PROCNO 1

F2 - Acquisition Parameters

Date\_ 20220314  
Time 19.06  
INSTRUM spect  
PROBHD 5 mm PABBO BB/  
PULPROG zgpg30  
TD 65536  
SOLVENT CDCl<sub>3</sub>  
NS 1024  
DS 4  
SWH 24038.461 Hz  
FIDRES 0.366798 Hz  
AQ 1.3631488 sec  
RG 2050  
DW 20.800 usec  
DE 6.50 usec  
TE 300.0 K  
D1 2.00000000 sec  
D11 0.03000000 sec  
TD0 1

==== CHANNEL f1 =====  
SFO1 100.6605506 MHz  
NUC1 13C  
P1 11.00 usec  
PLW1 48.00000000 W

==== CHANNEL f2 =====  
SFO2 400.2816011 MHz  
NUC2 1H  
CPDPRG[2] waltz16  
PCPD2 90.00 usec  
PLW2 17.00000000 W  
PLW12 0.24753000 W  
PLW13 0.20050000 W

F2 - Processing parameters  
SI 32768  
SF 100.6504861 MHz  
WDW EM  
SSB 0  
LB 1.00 Hz  
GB 0  
PC 1.40

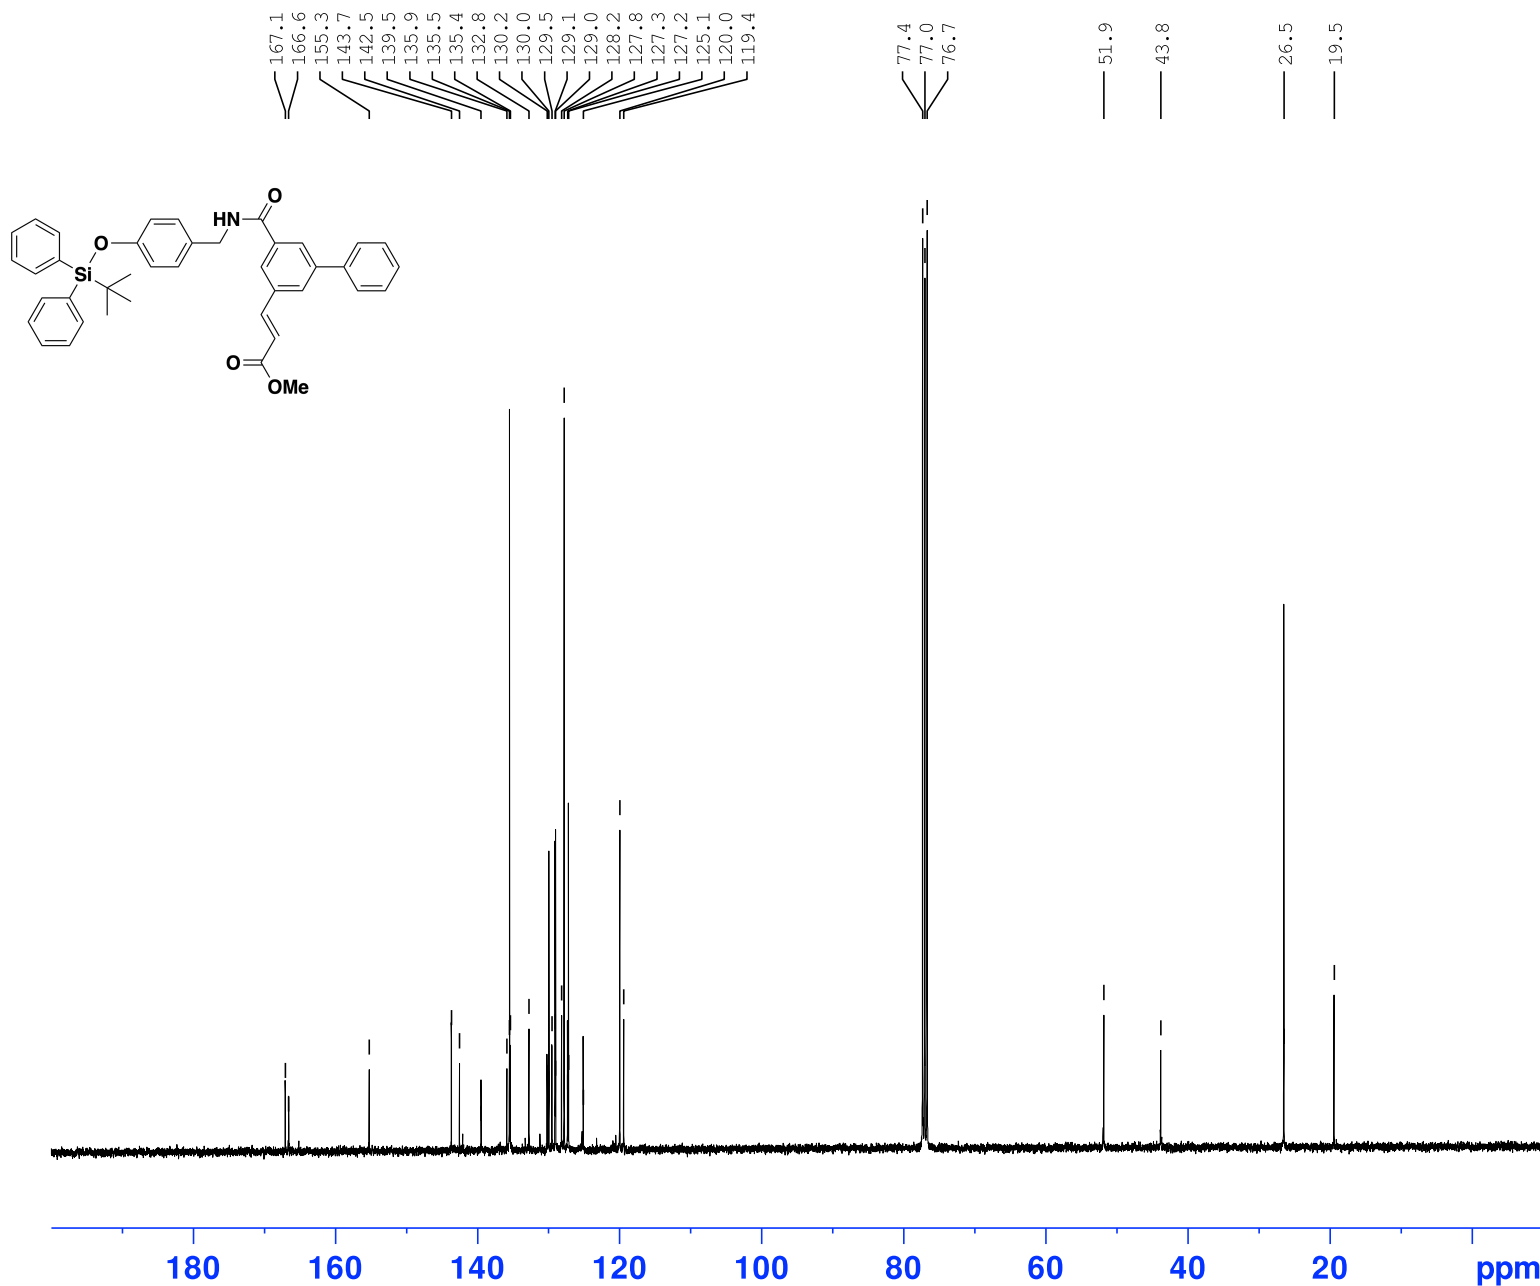

<sup>1</sup>H NMR (400 MHz, (CD<sub>3</sub>)<sub>2</sub>SO), Methyl (*E*)-3-(5-((4-hydroxybenzyl)carbamoyl)-[1,1'-biphenyl]-3-yl)acrylate (**13**)

AVC-2-44  
DMSO

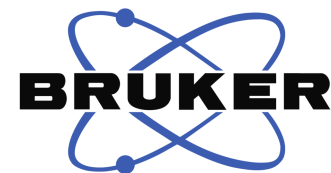

Current Data Parameters  
NAME May31-2022-PTlab  
EXPNO 60  
PROCNO 1

F2 - Acquisition Parameters  
Date\_ 20220531  
Time 16.31  
INSTRUM spect  
PROBHD 5 mm PABBO BB/  
PULPROG zg30  
TD 30046  
SOLVENT DMSO  
NS 16  
DS 1  
SWH 8012.820 Hz  
FIDRES 0.266685 Hz  
AQ 1.8748704 sec  
RG 80.6  
DW 62.400 usec  
DE 6.50 usec  
TE 300.1 K  
D1 6.00000000 sec  
TD0 1

===== CHANNEL f1 =====  
SFO1 400.2821952 MHz  
NUC1 1H  
P1 10.86 usec  
PLW1 17.00000000 W

F2 - Processing parameters  
SI 131072  
SF 400.2800000 MHz  
WDW EM  
SSB 0  
LB 0.20 Hz  
GB 0  
PC 1.00

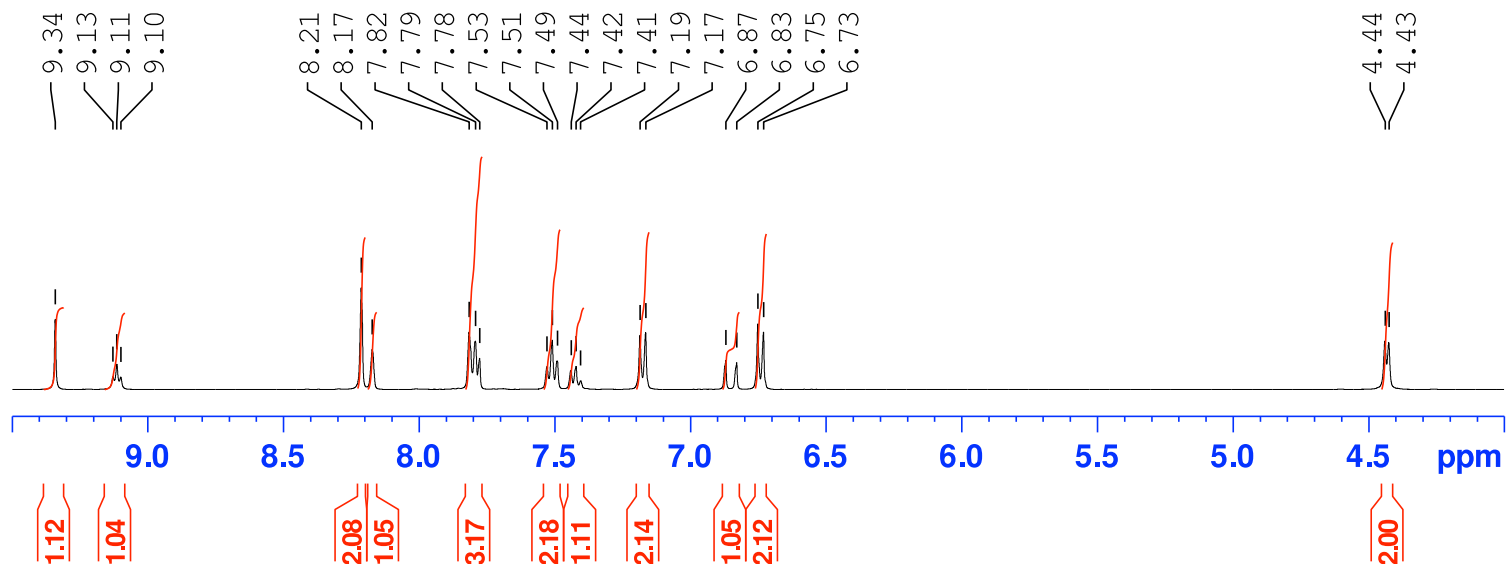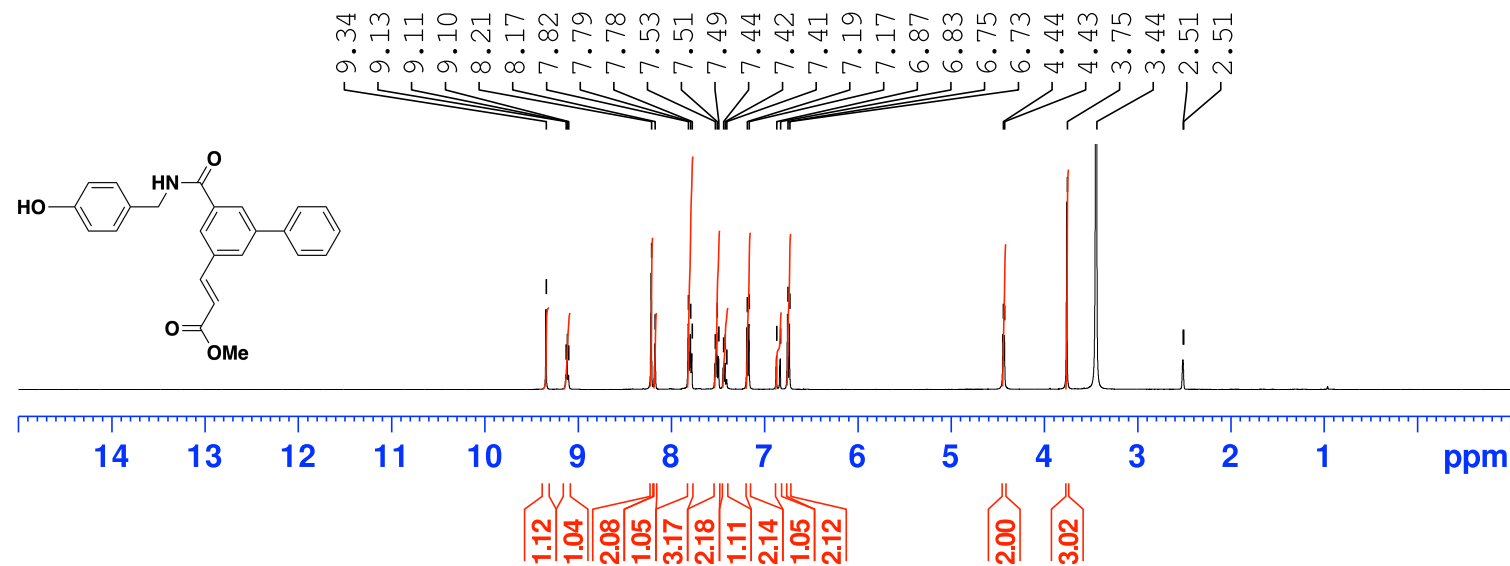

<sup>13</sup>C NMR (100 MHz, (CD<sub>3</sub>)<sub>2</sub>SO), Methyl (*E*)-3-(5-((4-hydroxybenzyl)carbamoyl)-[1,1'-biphenyl]-3-yl)acrylate (**13**)

AVC-2-44

DMSO

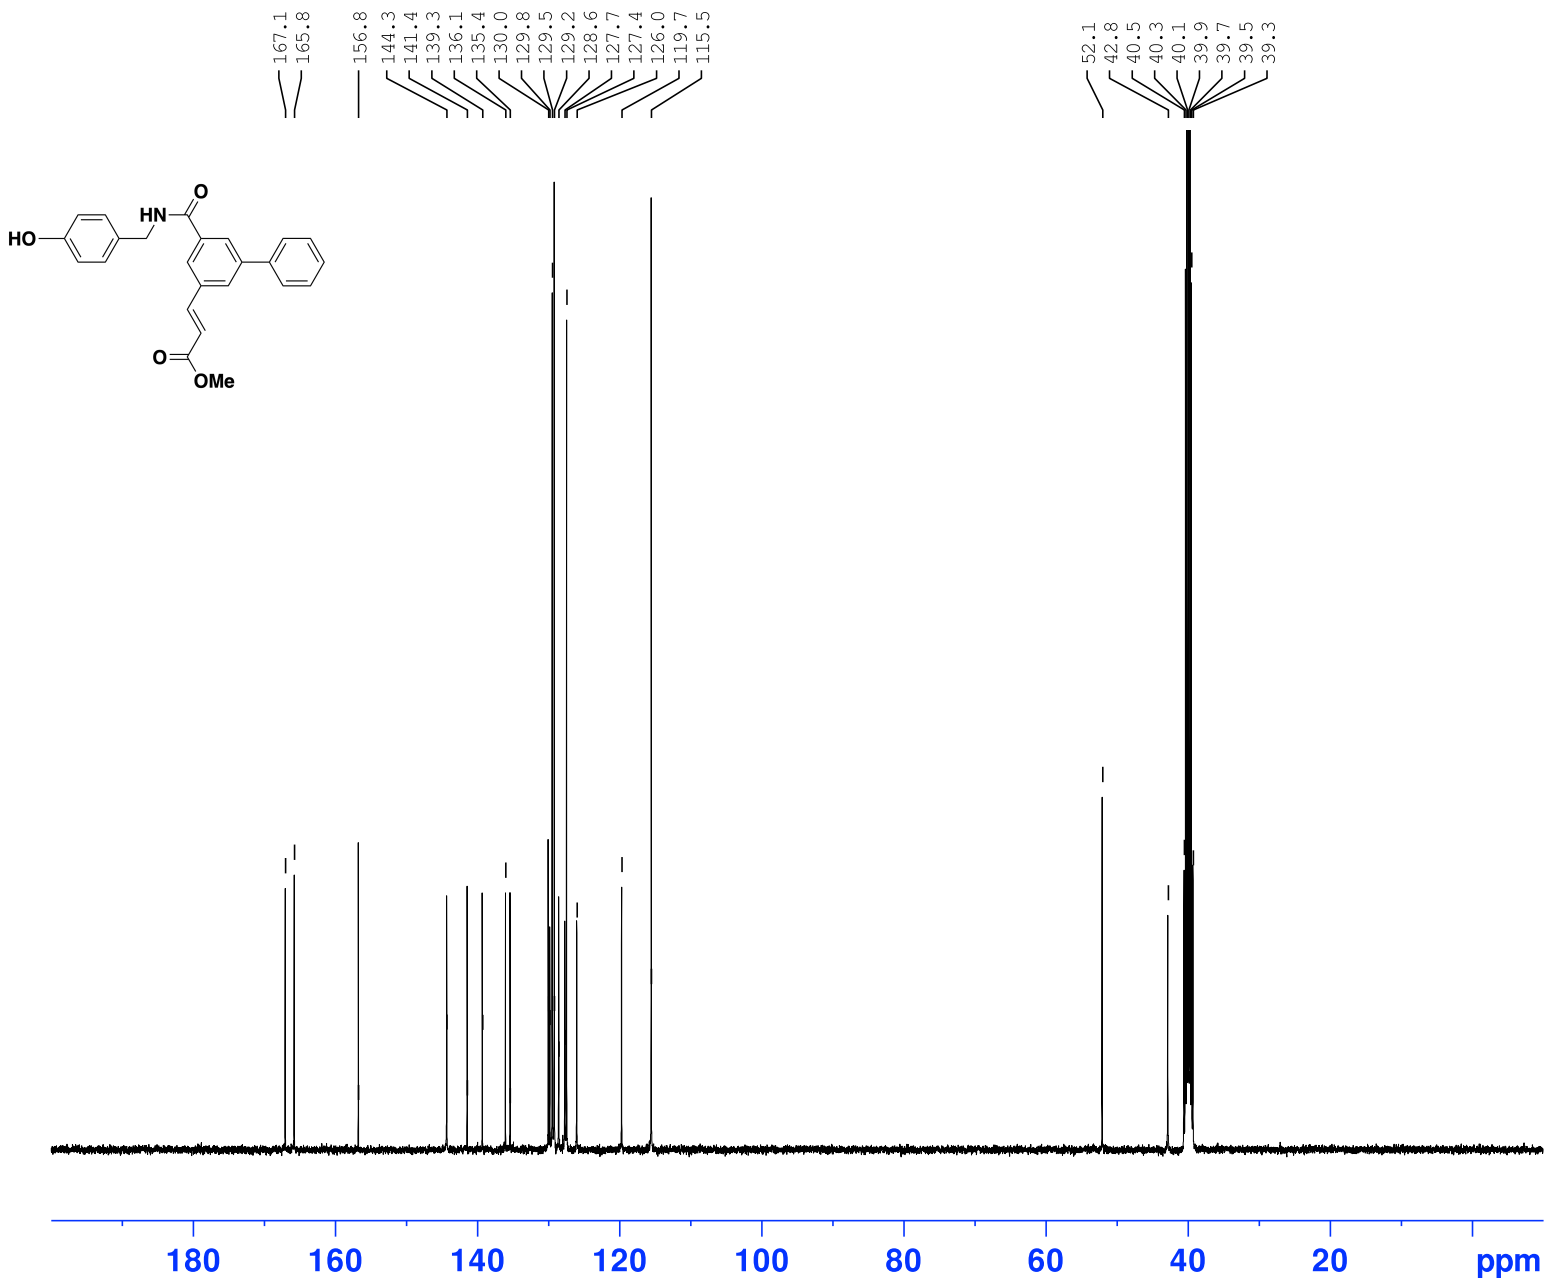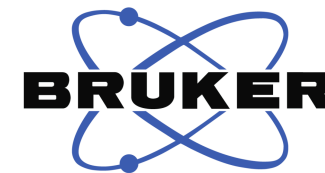

Current Data Parameters  
NAME May31-2022-PTlab  
EXPNO 61  
PROCNO 1

F2 - Acquisition Parameters  
Date\_ 20220531  
Time 18.06  
INSTRUM spect  
PROBHD 5 mm PABBO BB/  
PULPROG zgpg30  
TD 65536  
SOLVENT DMSO  
NS 1536  
DS 4  
SWH 24038.461 Hz  
FIDRES 0.366798 Hz  
AQ 1.3631488 sec  
RG 2050  
DW 20.800 usec  
DE 6.50 usec  
TE 300.1 K  
D1 2.00000000 sec  
D11 0.03000000 sec  
TD0 1

==== CHANNEL f1 =====  
SFO1 100.6605506 MHz  
NUC1 13C  
P1 11.00 usec  
PLW1 48.00000000 W

==== CHANNEL f2 =====  
SFO2 400.2816011 MHz  
NUC2 1H  
CPDPRG[2] waltz16  
PCPD2 90.00 usec  
PLW2 17.00000000 W  
PLW12 0.24753000 W  
PLW13 0.20050000 W

F2 - Processing parameters  
SI 32768  
SF 100.6504861 MHz  
WDW EM  
SSB 0  
LB 1.00 Hz  
GB 0  
PC 1.40

<sup>1</sup>H NMR (400 MHz, CDCl<sub>3</sub>), Methyl(*E*)-3-(5-((4-(prop-2-yn-1-yloxy)benzyl)carbamoyl)-[1,1'-biphenyl]-3-yl)acrylate (**14**)

AVC-2-49  
CDCl<sub>3</sub>



Current Data Parameters  
NAME Jul27-2022-PTlab  
EXPNO 20  
PROCNO 1

F2 - Acquisition Parameters  
Date\_ 20220727  
Time 12.24  
INSTRUM spect  
PROBHD 5 mm PABBO BB/  
PULPROG zg30  
TD 30046  
SOLVENT CDCl<sub>3</sub>  
NS 16  
DS 1  
SWH 8012.820 Hz  
FIDRES 0.266685 Hz  
AQ 1.8748704 sec  
RG 256  
DW 62.400 usec  
DE 6.50 usec  
TE 300.0 K  
D1 6.00000000 sec  
TD0 1

==== CHANNEL f1 =====  
SFO1 400.2821952 MHz  
NUC1 1H  
P1 10.86 usec  
PLW1 17.00000000 W

F2 - Processing parameters  
SI 131072  
SF 400.2800000 MHz  
WDW EM  
SSB 0  
LB 0.20 Hz  
GB 0  
PC 1.00

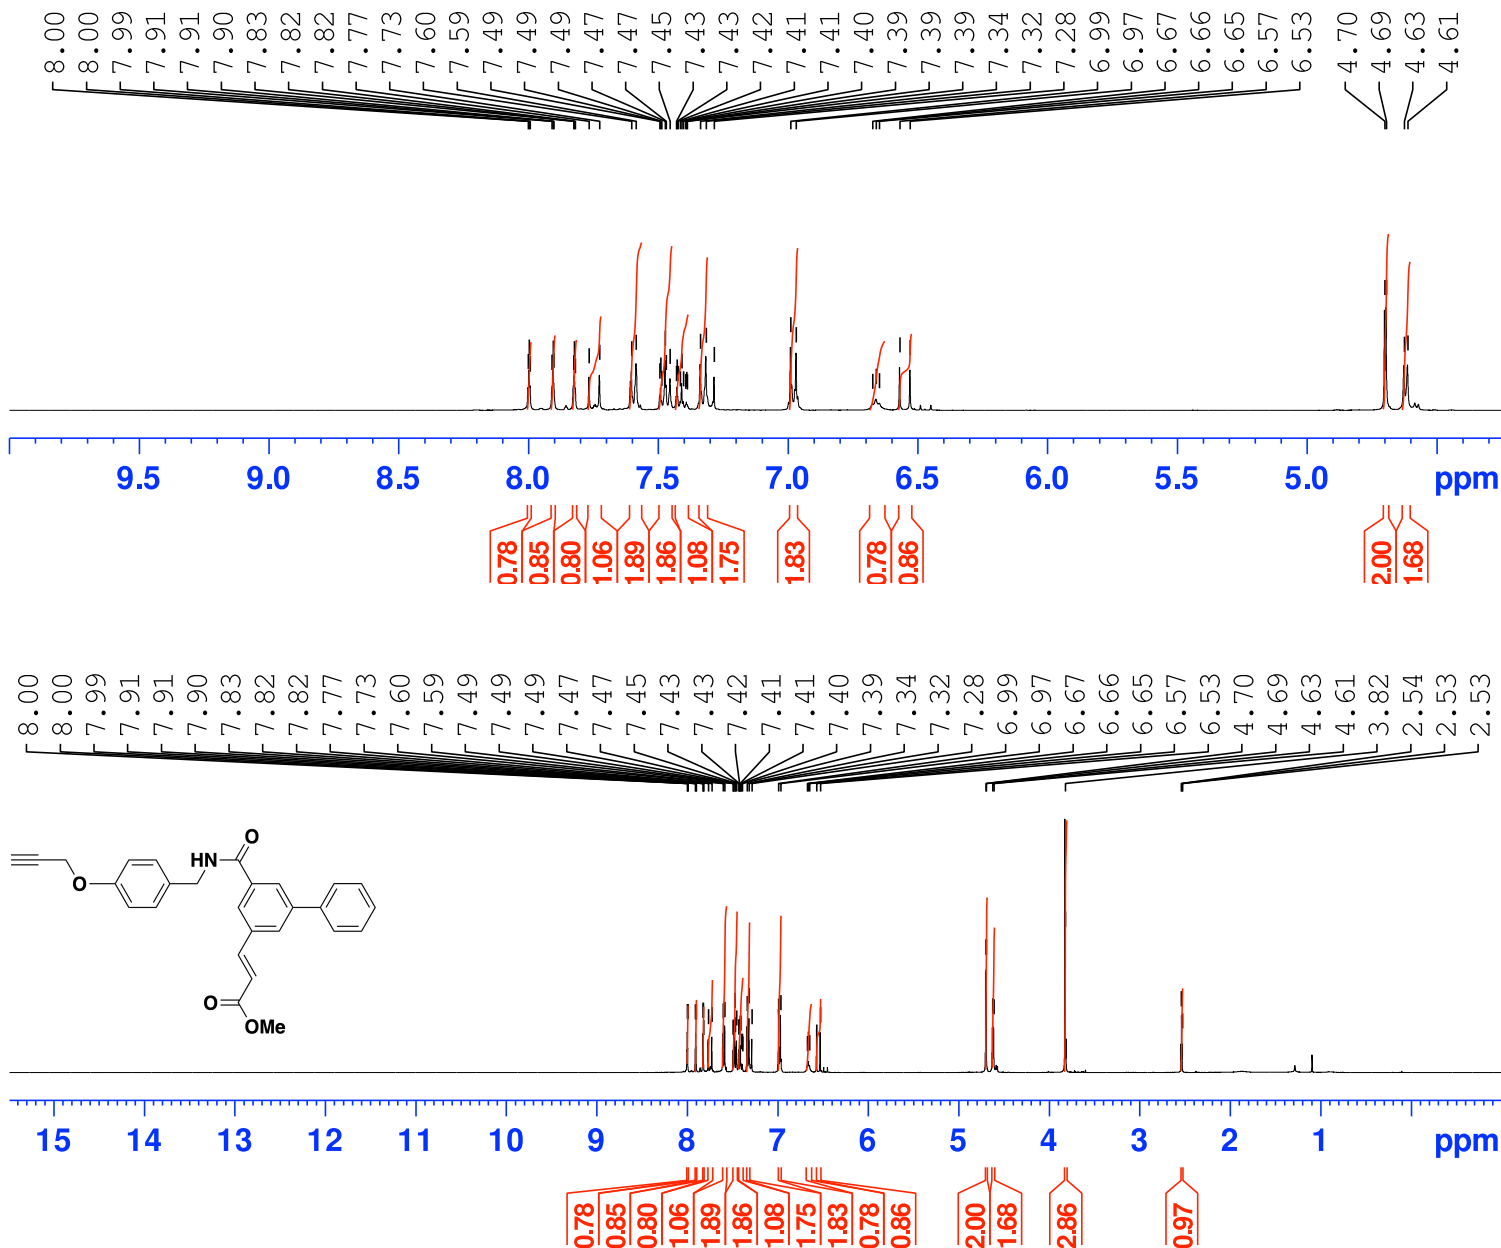



<sup>13</sup>C NMR (100 MHz, CDCl<sub>3</sub>), Methyl(*E*)-3-(5-((4-(prop-2-yn-1-yloxy)benzyl)carbamoyl)-[1,1'-biphenyl]-3-yl)acrylate (**14**)

AVC-2-49  
CDCl<sub>3</sub>

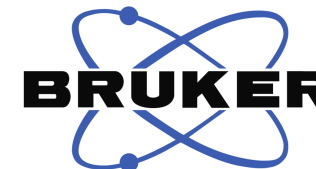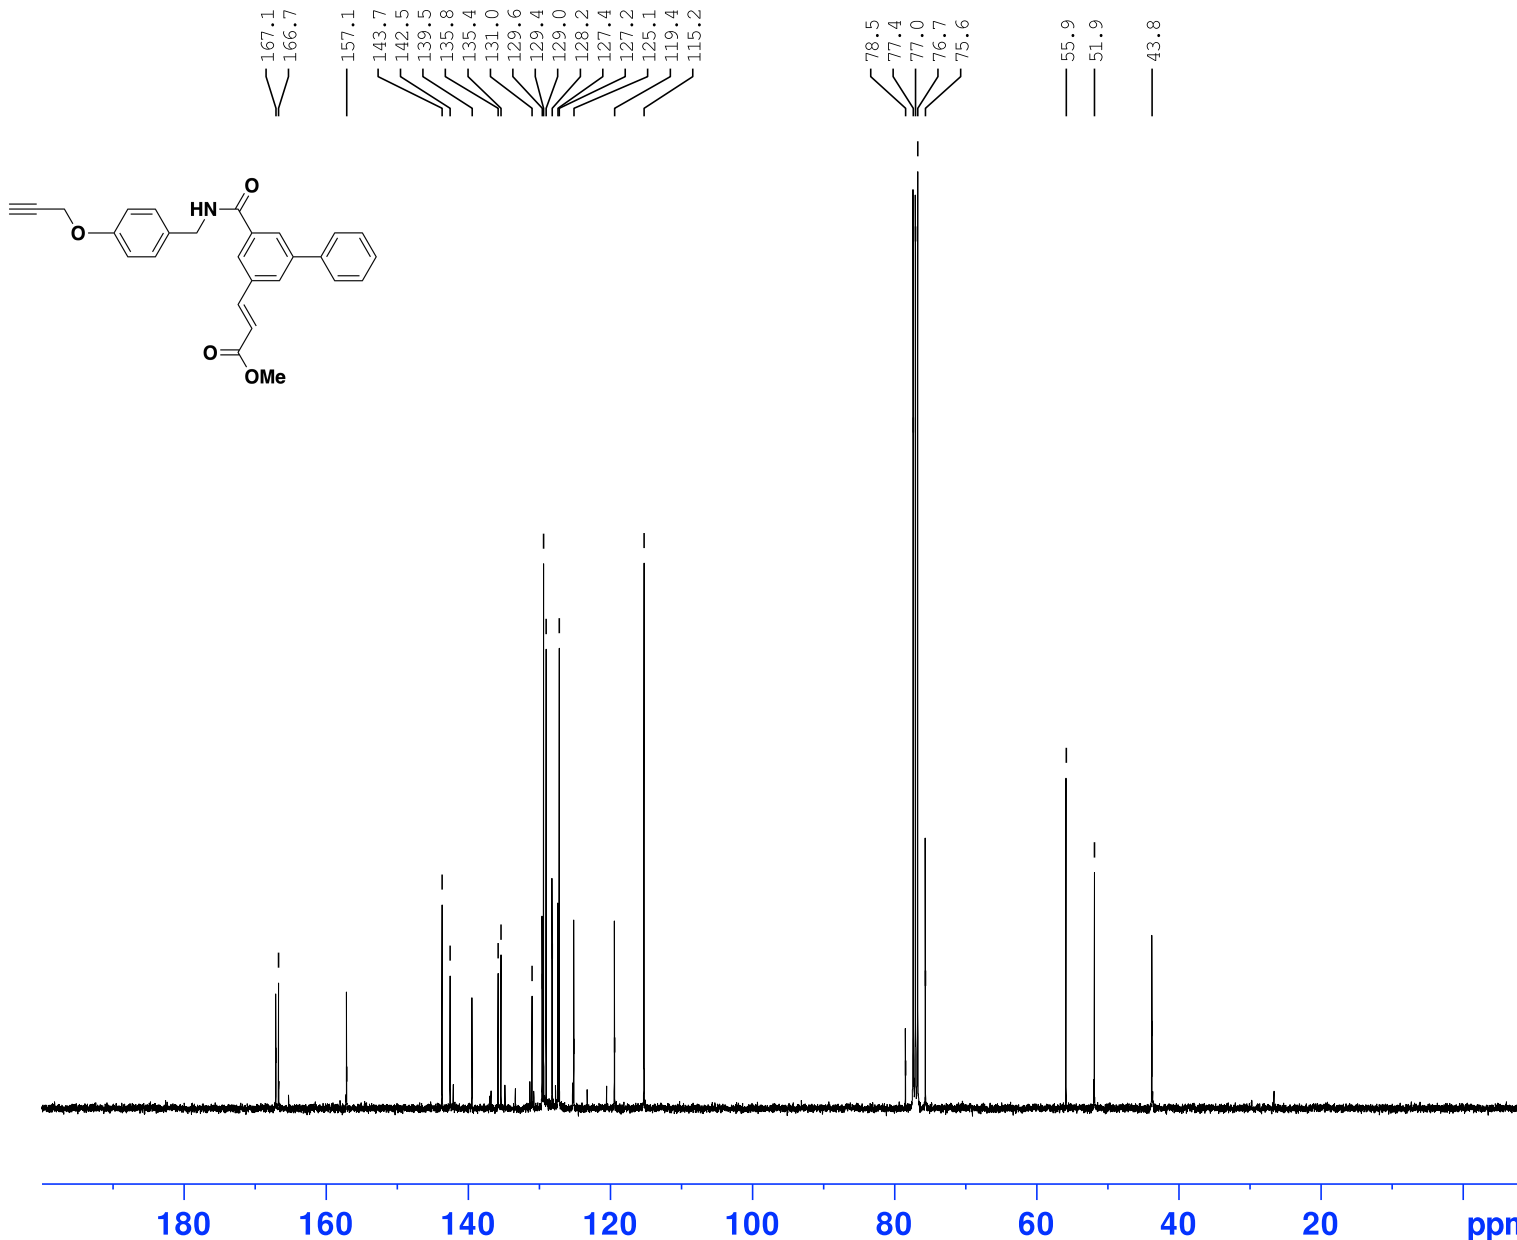

Current Data Parameters  
NAME Jul27-2022-PTlab  
EXPNO 21  
PROCNO 1

F2 - Acquisition Parameters  
Date\_ 20220727  
Time 15.14  
INSTRUM spect  
PROBHD 5 mm PABBO BB/  
PULPROG zgpg30  
TD 65536  
SOLVENT CDCl<sub>3</sub>  
NS 1024  
DS 4  
SWH 24038.461 Hz  
FIDRES 0.366798 Hz  
AQ 1.3631488 sec  
RG 2050  
DW 20.800 usec  
DE 6.50 usec  
TE 300.0 K  
D1 2.0000000 sec  
D11 0.0300000 sec  
TDO 1

==== CHANNEL f1 =====  
SFO1 100.6605506 MHz  
NUC1 13C  
P1 11.00 usec  
PLW1 48.0000000 W

==== CHANNEL f2 =====  
SFO2 400.2816011 MHz  
NUC2 1H  
CPDPRG[2] waltz16  
PCPD2 90.00 usec  
PLW2 17.0000000 W  
PLW12 0.2475300 W  
PLW13 0.2005000 W

F2 - Processing parameters  
SI 32768  
SF 100.6504861 MHz  
WDW EM  
SSB 0  
LB 1.00 Hz  
GB 0  
PC 1.40

<sup>1</sup>H NMR (400 MHz, (CD<sub>3</sub>)<sub>2</sub>SO), (E)-3-(5-((4-Methylbenzyl)carbamoyl)-[1,1'-biphenyl]-3-yl)acrylic acid (**3**)

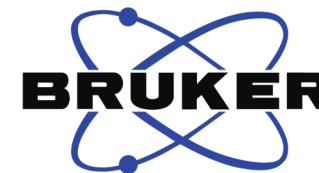

Current Data Parameters  
 NAME Nov04-2020-PTlab  
 EXPNO 20  
 PROCNO 1

F2 - Acquisition Parameters  
 Date\_ 20201104  
 Time 15.16  
 INSTRUM spect  
 PROBHD 5 mm PABBO BB/  
 PULPROG zg30  
 TD 30046  
 SOLVENT DMSO  
 NS 16  
 DS 1  
 SWH 8012.820 Hz  
 FIDRES 0.266685 Hz  
 AQ 1.8748704 sec  
 RG 256  
 DW 62.400 usec  
 TE 300.1 K  
 D1 6.00000000 sec  
 TD0 1

===== CHANNEL f1 =====  
 SFO1 400.2821952 MHz  
 NUC1 1H  
 P1 10.86 usec  
 PLW1 17.00000000 W

F2 - Processing parameters  
 SI 131072  
 SF 400.2800000 MHz  
 WDW EM  
 SSB 0  
 LB 0.20 Hz  
 GB 0  
 PC 1.00

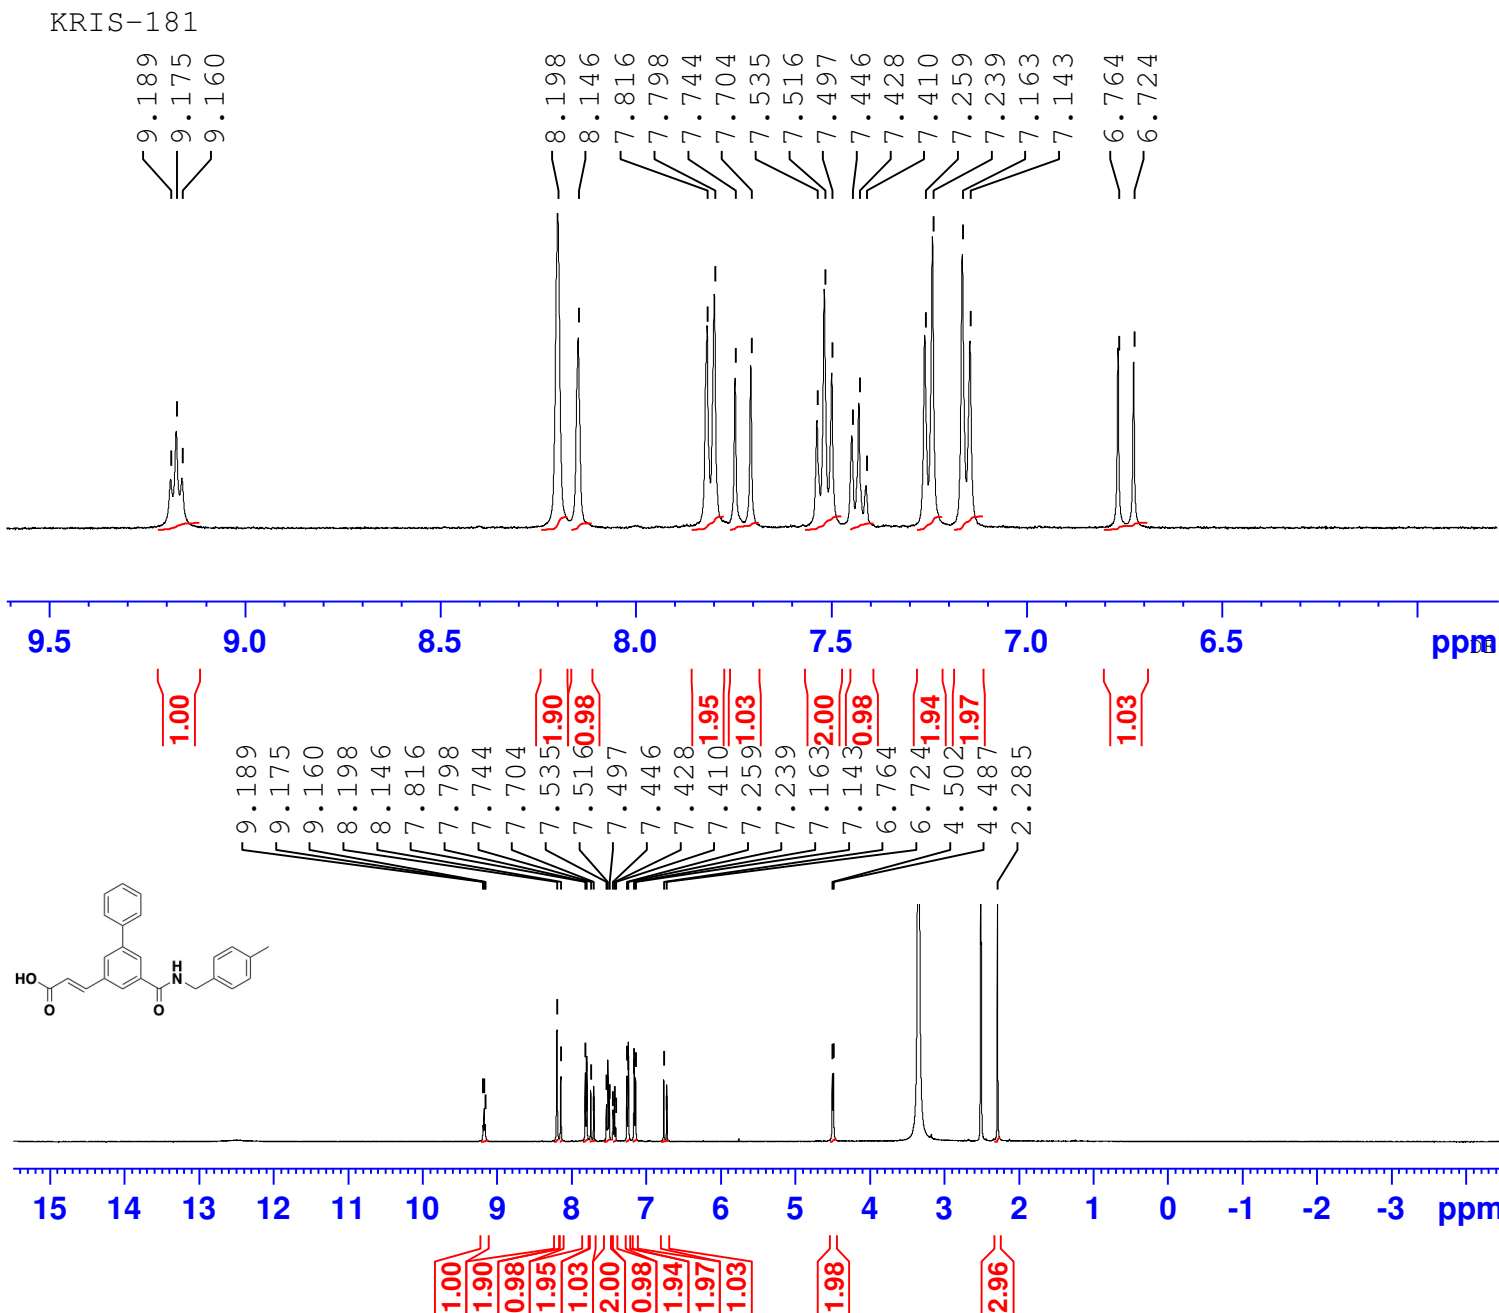

<sup>13</sup>C NMR (100 MHz, (CD<sub>3</sub>)<sub>2</sub>SO), (E)-3-(5-((4-Methylbenzyl)carbamoyl)-[1,1'-biphenyl]-3-yl)acrylic acid (**3**)

KRIS-181

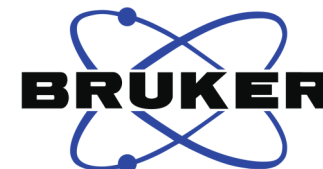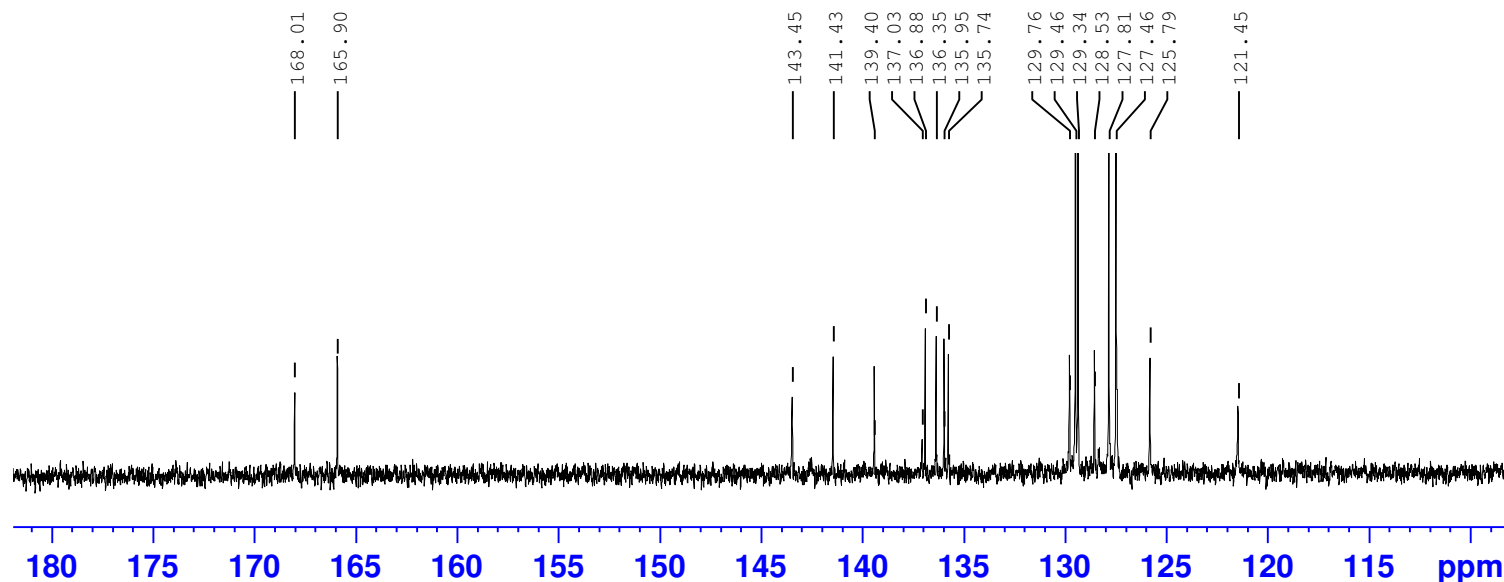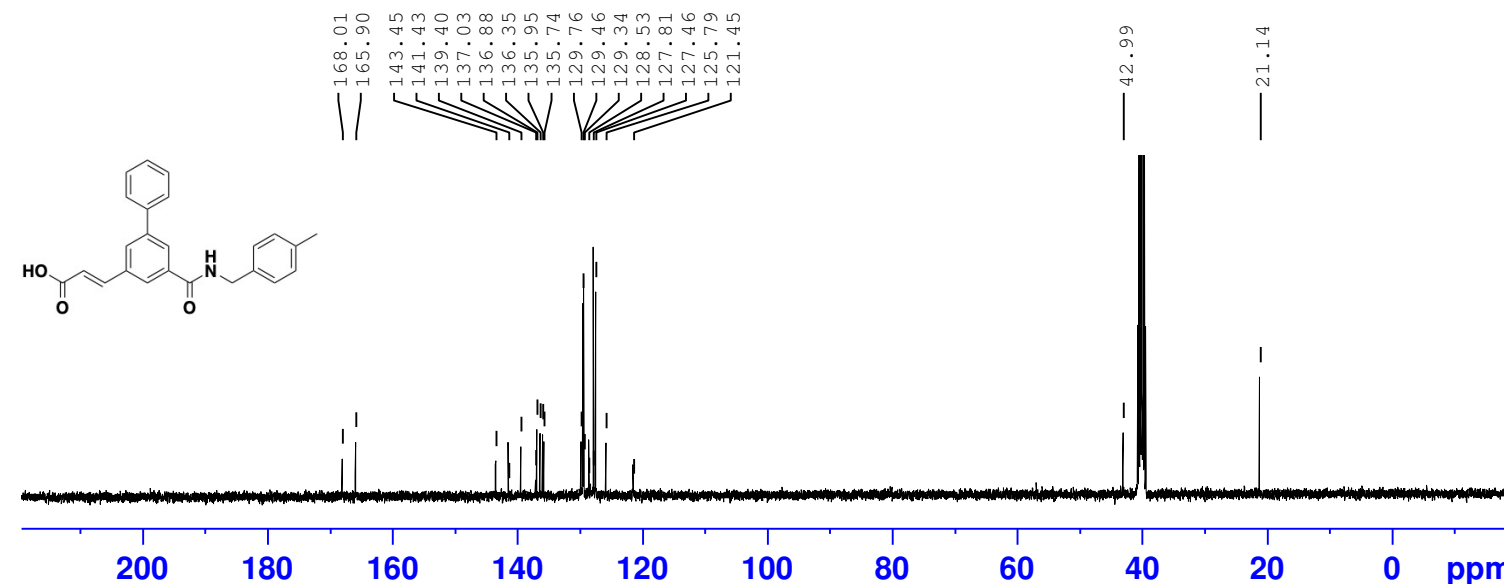

Current Data Parameters  
NAME Nov03-2020-PTlab  
EXPNO 50  
PROCNO 1

F2 - Acquisition Parameters  
Date\_ 20201103  
Time 14.55  
INSTRUM spect  
PROBHD 5 mm PABBO BB/  
PULPROG zgpg30  
TD 65536  
SOLVENT DMSO  
NS 350  
DS 4  
SWH 24038.461 Hz  
FIDRES 0.366798 Hz  
AQ 1.3631488 sec  
RG 2050  
DW 20.800 usec  
DE 6.50 usec  
TE 300.1 K  
D1 2.00000000 sec  
D11 0.03000000 sec  
TD0 1

==== CHANNEL f1 =====  
SFO1 100.6605506 MHz  
NUC1 13C  
P1 11.00 usec  
PLW1 48.00000000 W

==== CHANNEL f2 =====  
SFO2 400.2816011 MHz  
NUC2 1H  
CPDPRG[2] waltz16  
PCPD2 90.00 usec  
PLW2 17.00000000 W  
PLW12 0.24753000 W  
PLW13 0.20050000 W

F2 - Processing parameters  
SI 32768  
SF 100.6504861 MHz  
WDW EM  
SSB 0  
LB 1.00 Hz  
GB 0  
PC 1.40

<sup>1</sup>H NMR (400 MHz, CDCl<sub>3</sub>), *tert*-butyl 2-(2-(2-azidoethoxy)ethoxy)acetate (**16**)

AVC-118-3  
CDCl<sub>3</sub>



Current Data Parameters  
NAME Feb25-2022-PTlab  
EXPNO 50  
PROCNO 1

F2 - Acquisition Parameters  
Date\_ 20220225  
Time 15.58  
INSTRUM spect  
PROBHD 5 mm PABBO BB/  
PULPROG zg30  
TD 30046  
SOLVENT CDCl<sub>3</sub>  
NS 16  
DS 1  
SWH 8012.820 Hz  
FIDRES 0.266685 Hz  
AQ 1.8748704 sec  
RG 80.6  
DW 62.400 usec  
DE 6.50 usec  
TE 300.1 K  
D1 6.00000000 sec  
TD0 1

==== CHANNEL f1 =====  
SFO1 400.2821952 MHz  
NUC1 1H  
P1 10.86 usec  
PLW1 17.00000000 W

F2 - Processing parameters  
SI 131072  
SF 400.2800000 MHz  
WDW EM  
SSB 0  
LB 0.20 Hz  
GB 0  
PC 1.00

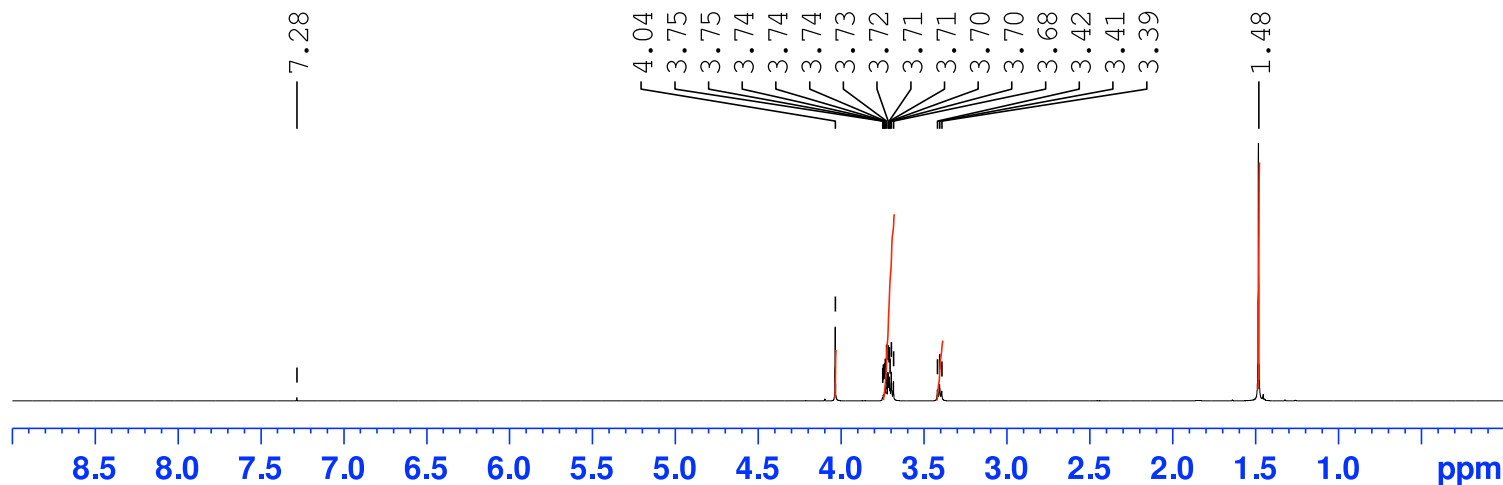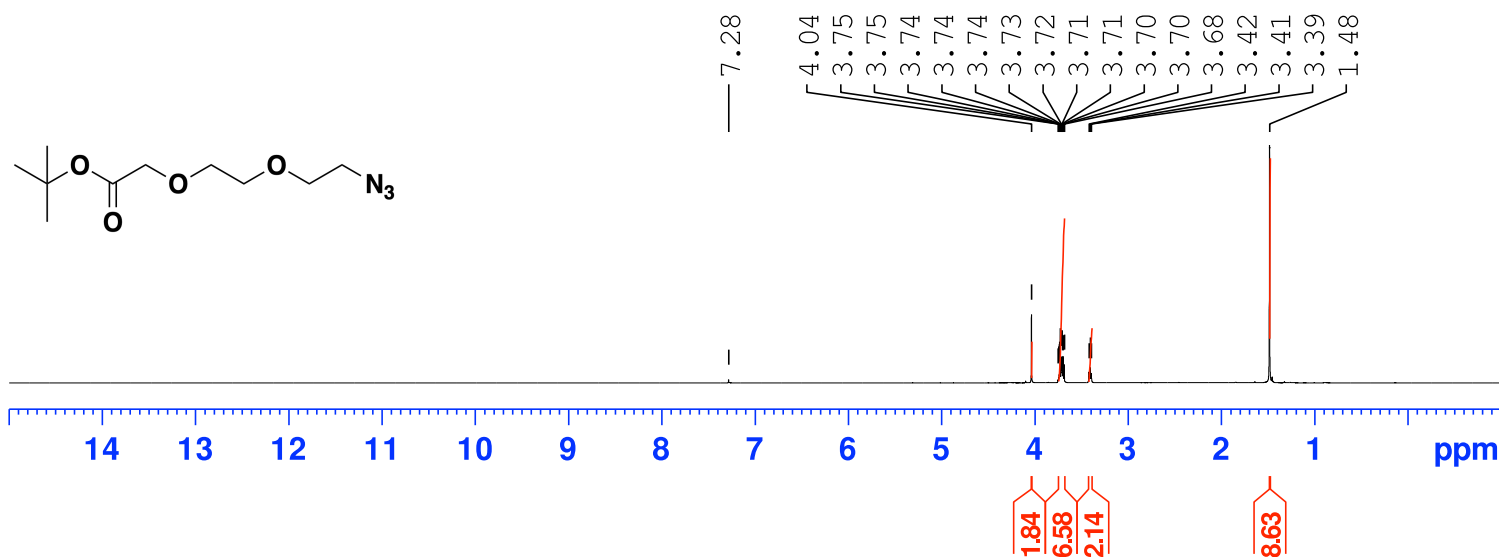

<sup>13</sup>C NMR (100 MHz, CDCl<sub>3</sub>), *tert*-butyl 2-(2-(2-azidoethoxy)ethoxy)acetate (**16**)

AVC-118-3  
CDCl<sub>3</sub>

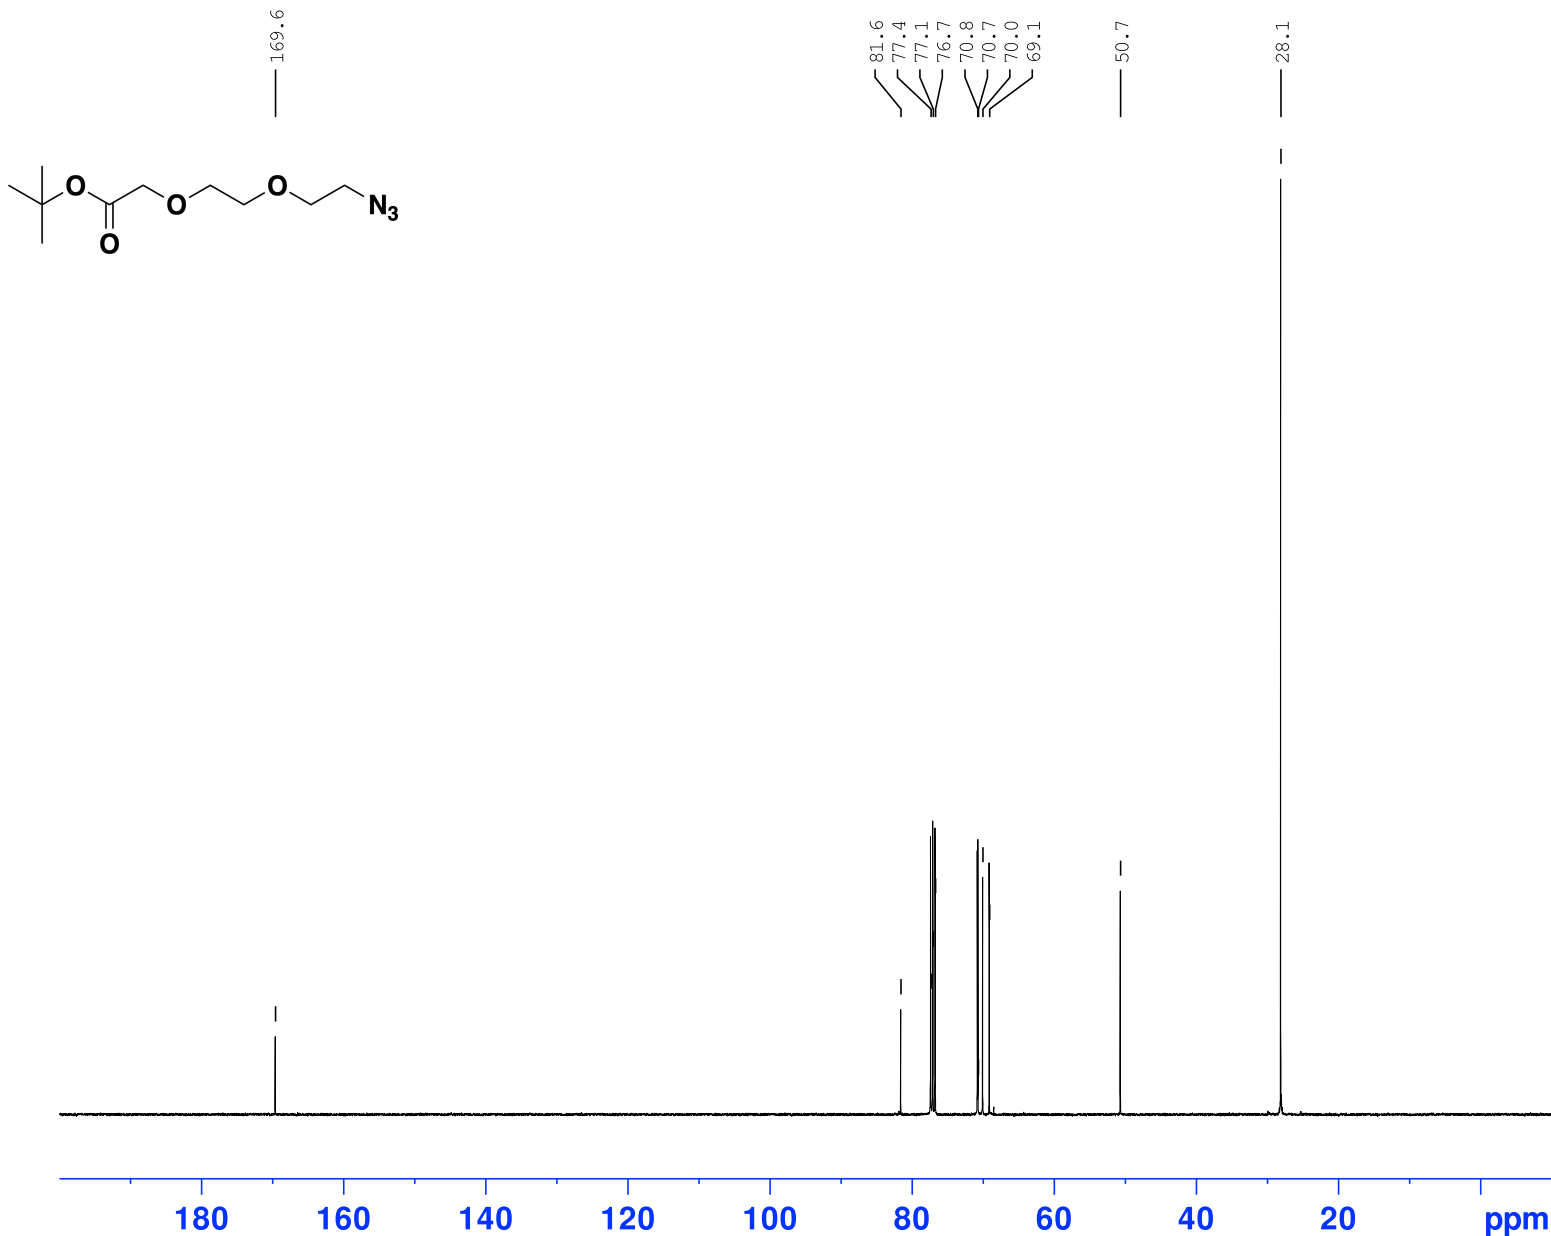

Current Data Parameters  
NAME Feb25-2022-PTlab  
EXPNO 51  
PROCNO 1

F2 - Acquisition Parameters  
Date\_ 20220225  
Time 19.08  
INSTRUM spect  
PROBHD 5 mm PABBO BB/  
PULPROG zgpg30  
TD 65536  
SOLVENT CDCl<sub>3</sub>  
NS 1024  
DS 4  
SWH 24038.461 Hz  
FIDRES 0.366798 Hz  
AQ 1.3631488 sec  
RG 2050  
DW 20.800 usec  
DE 6.50 usec  
TE 300.0 K  
D1 2.0000000 sec  
D11 0.0300000 sec  
TD0 1

==== CHANNEL f1 =====  
SF01 100.6605506 MHz  
NUC1 13C  
P1 11.00 usec  
PLW1 48.0000000 W

==== CHANNEL f2 =====  
SF02 400.2816011 MHz  
NUC2 1H  
CPDPRG[2] waltz16  
PCPD2 90.00 usec  
PLW2 17.0000000 W  
PLW12 0.24753000 W  
PLW13 0.20050000 W

F2 - Processing parameters  
SI 32768  
SF 100.6504861 MHz  
WDW EM  
SSB 0  
LB 1.00 Hz  
GB 0  
PC 1.40

<sup>1</sup>H NMR (400 MHz, CDCl<sub>3</sub>), 2-(2-(2-azidoethoxy)ethoxy)-N-(2-(2,6-dioxopiperidin-3-yl)-1-oxoisindolin-4-yl)acetamide (18)

AVC-2-1  
CDCl<sub>3</sub>

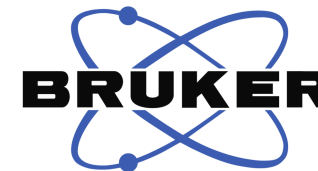

Current Data Parameters  
NAME Apr12-2022-PTlab  
EXPNO 10  
PROCNO 1

F2 - Acquisition Parameters

Date\_ 20220412  
Time 15.41  
INSTRUM spect  
PROBHD 5 mm PABBO BB/  
PULPROG zg30  
TD 30046  
SOLVENT CDCl<sub>3</sub>  
NS 16  
DS 1  
SWH 8012.820 Hz  
FIDRES 0.266685 Hz  
AQ 1.8748704 sec  
RG 256  
DW 62.400 usec  
DE 6.50 usec  
TE 300.1 K  
D1 6.0000000 sec  
TDO 1

===== CHANNEL f1 =====  
SFO1 400.2821952 MHz  
NUC1 1H  
P1 10.86 usec  
PLW1 17.0000000 W

F2 - Processing parameters

SI 131072  
SF 400.2800000 MHz  
WDW EM  
SSB 0  
LB 0.20 Hz  
GB 0  
PC 1.00

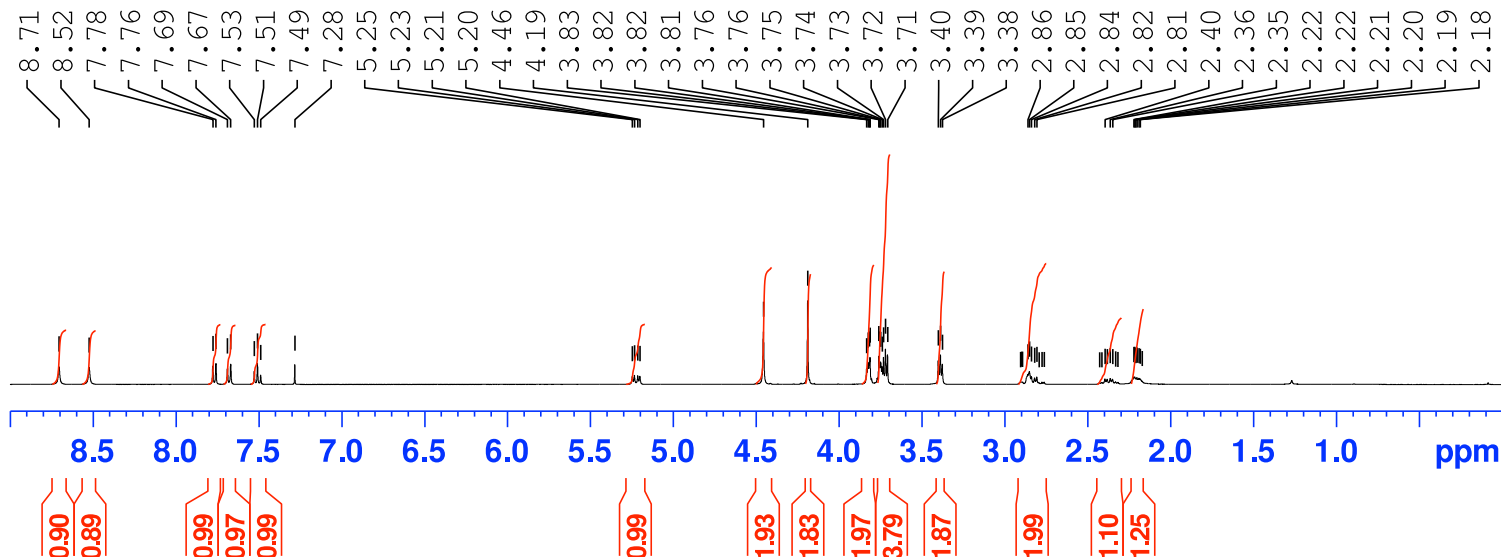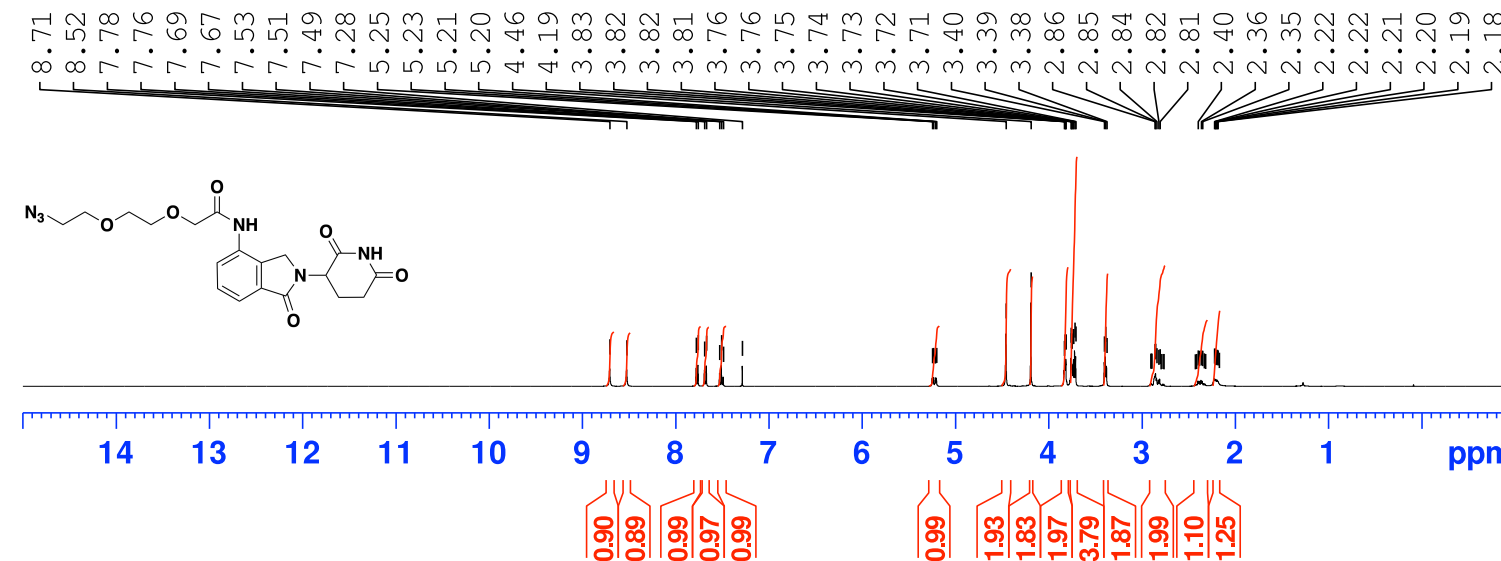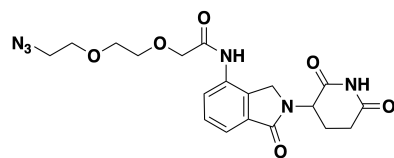



<sup>1</sup>H NMR (400 MHz, CD<sub>3</sub>OD), Methyl (*E*)-3-(5-((4-((1-(2-(2-((2-(2,6-dioxopiperidin-3-yl)-1-oxoisindolin-4-yl)amino)-2-oxoethoxy)ethoxy)ethyl)-1H-1,2,3-triazol-4-yl)methoxy)benzyl)carbamoyl)-[1,1'-biphenyl]-3-yl)acrylate (**19**)

AVC-2-54.2.1

MeOD

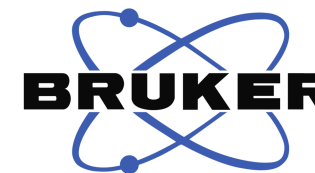

Current Data Parameters  
 NAME Jun23-2022-PTlab  
 EXPNO 20  
 PROCNO 1

F2 - Acquisition Parameters

Date\_ 20220623  
 Time 13.03  
 INSTRUM spect  
 PROBHD 5 mm PABBO BB/  
 PULPROG zg30  
 TD 30046  
 SOLVENT MeOD  
 NS 112  
 DS 1  
 SWH 8012.820 Hz  
 FIDRES 0.266685 Hz  
 AQ 1.8748704 sec  
 RG 256  
 DW 62.400 usec  
 DE 6.50 usec  
 TE 300.0 K  
 D1 6.00000000 sec  
 TDO 1

===== CHANNEL f1 =====  
 SF01 400.2821952 MHz  
 NUC1 1H  
 P1 10.86 usec  
 PLW1 17.00000000 W

F2 - Processing parameters

SI 131072  
 SF 400.2800000 MHz  
 WDW EM  
 SSB 0  
 LB 0.20 Hz  
 GB 0  
 PC 1.00

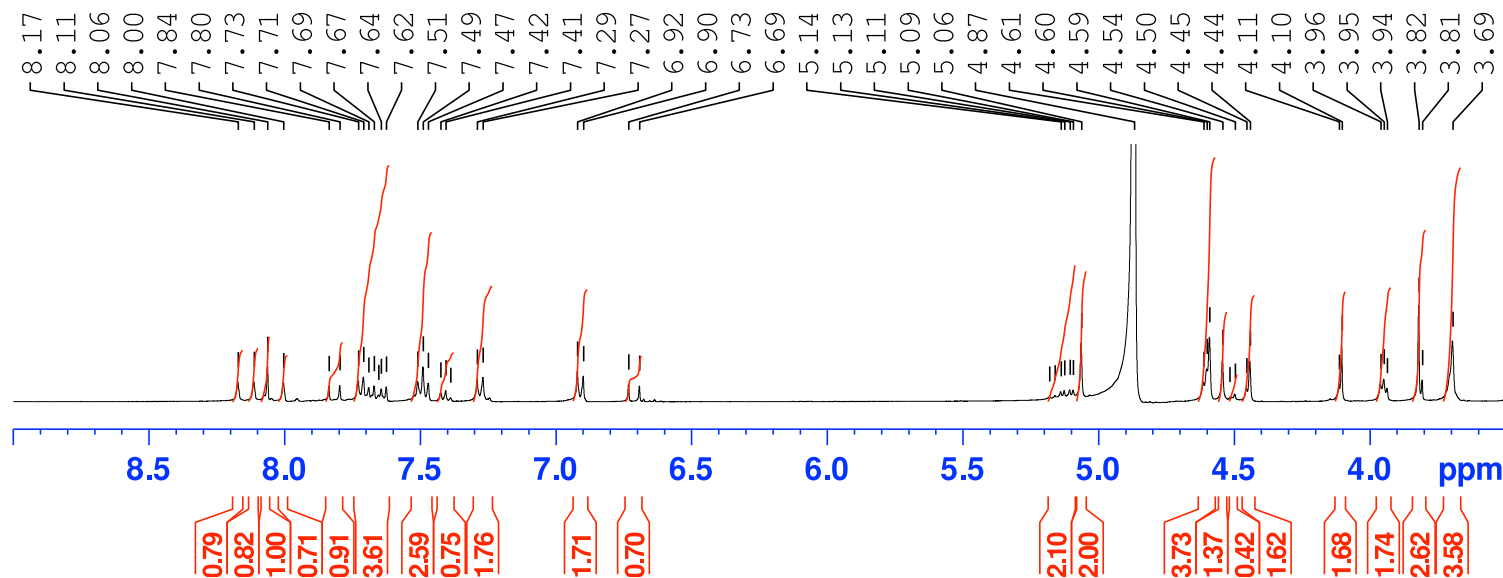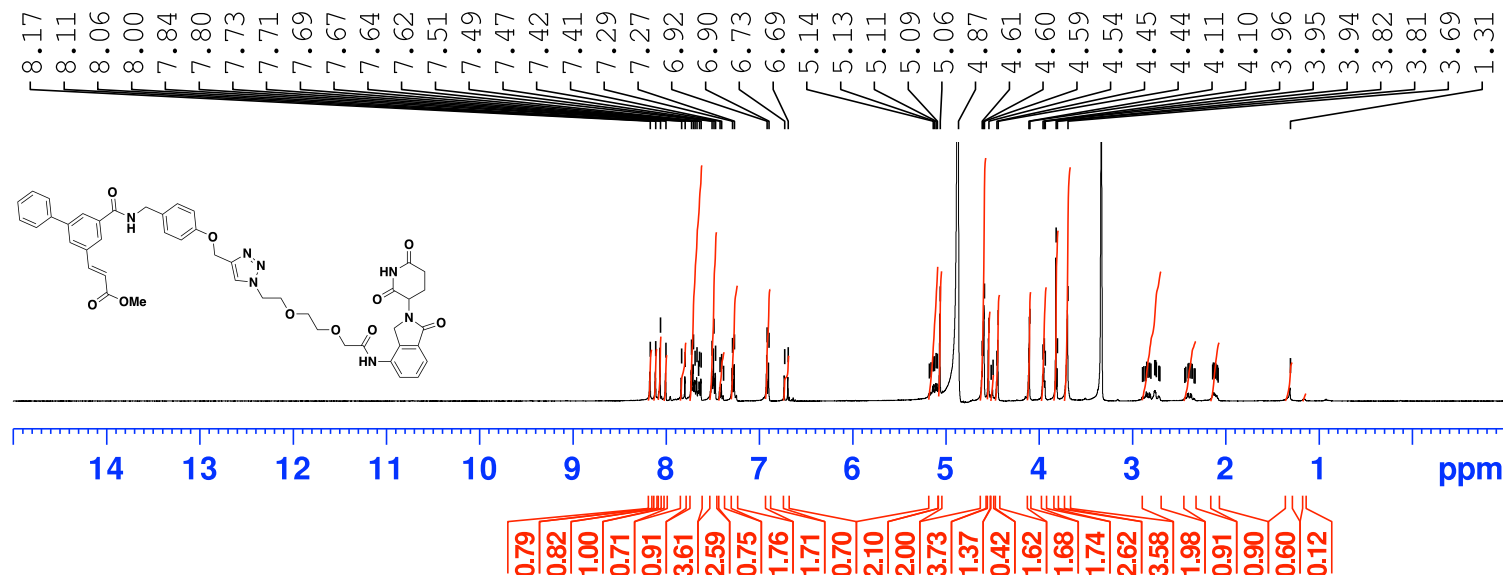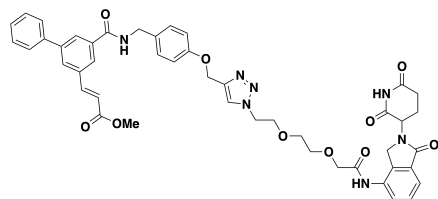



<sup>13</sup>C NMR (100 MHz, CD<sub>3</sub>OD), Methyl (*E*)-3-(5-((4-((1-(2-(2-(2-((2-(2,6-dioxopiperidin-3-yl)-1-oxoisindolin-4-yl)amino)-2-oxoethoxy)ethoxy)ethyl)-1H-1,2,3-triazol-4-yl)methoxy)benzyl)carbamoyl)-[1,1'-biphenyl]-3-yl)acrylate (**19**)

AVC-2-54.2.1

MeOD

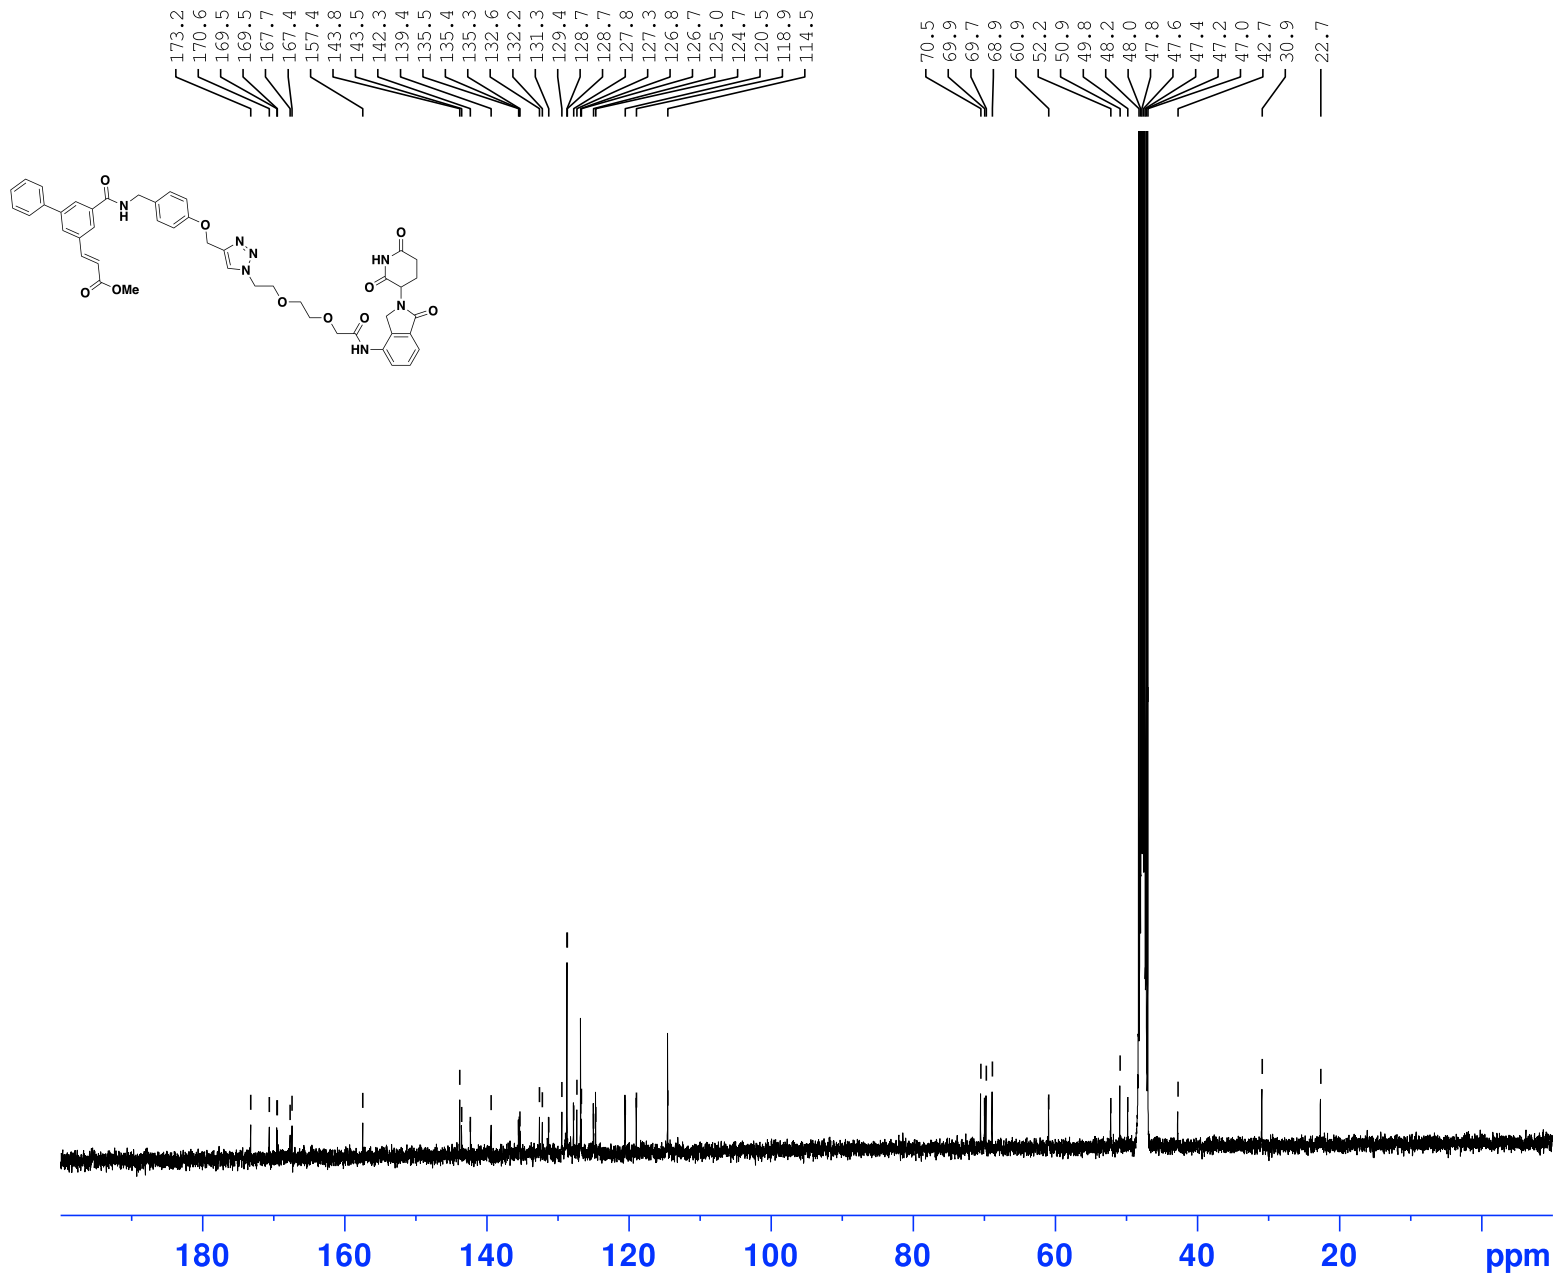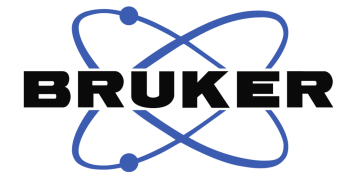

Current Data Parameters  
 NAME Jun24-2022-PTlab  
 EXPNO 10  
 PROCNO 1

F2 - Acquisition Parameters  
 Date\_ 20220624  
 Time 10.24  
 INSTRUM spect  
 PROBHD 5 mm PABBO BB/  
 PULPROG zgpg30  
 TD 65536  
 SOLVENT MeOD  
 NS 2560  
 DS 4  
 SWH 24038.461 Hz  
 FIDRES 0.366798 Hz  
 AQ 1.3631488 sec  
 RG 2050  
 DW 20.800 usec  
 DE 6.50 usec  
 TE 300.4 K  
 D1 2.00000000 sec  
 D11 0.03000000 sec  
 TD0 1

===== CHANNEL f1 =====  
 SFO1 100.6605506 MHz  
 NUC1 13C  
 P1 11.00 usec  
 PLW1 48.00000000 W

===== CHANNEL f2 =====  
 SFO2 400.2816011 MHz  
 NUC2 1H  
 CPDPRG[2] waltz16  
 PCPD2 90.00 usec  
 PLW2 17.00000000 W  
 PLW12 0.24753000 W  
 PLW13 0.20050000 W

F2 - Processing parameters  
 SI 32768  
 SF 100.6504861 MHz  
 WDW EM  
 SSB 0  
 LB 1.00 Hz  
 GB 0  
 PC 1.40



AC-1-001 YSH2

PROTON MeOD {C:\NMRDATA} PTLab 1

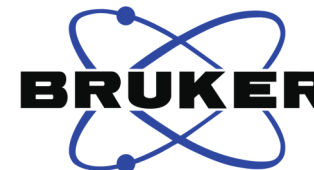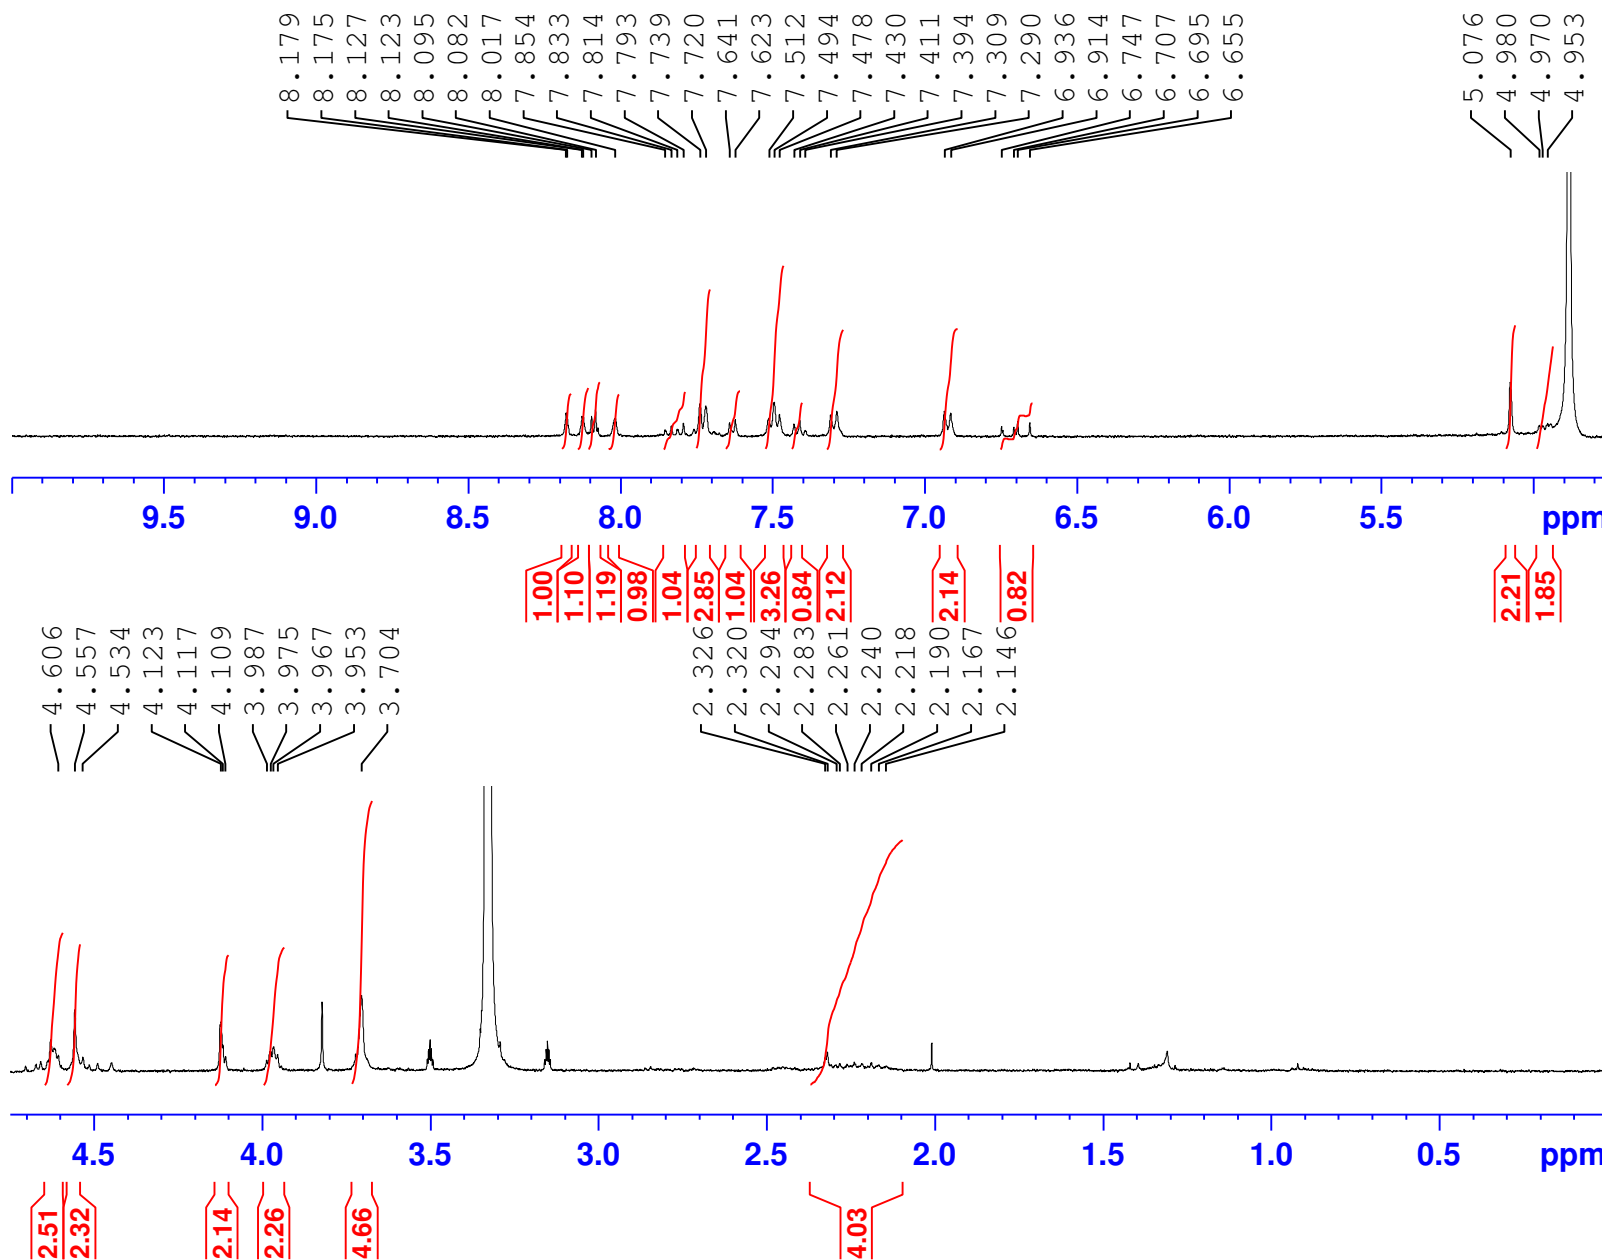

Current Data Parameters  
NAME Apr09-2023-PTLab  
EXPNO 10  
PROCNO 1

F2 - Acquisition Parameters  
Date\_ 20230409  
Time 16.42 h  
INSTRUM spect  
PROBHD z108618\_1068 (  
PULPROG zg30  
TD 65536  
SOLVENT MeOD  
NS 100  
DS 2  
SWH 8012.820 Hz  
FIDRES 0.244532 Hz  
AQ 4.0894465 sec  
RG 724  
DW 62.400 usec  
DE 17.62 usec  
TE 298.0 K  
D1 1.00000000 sec  
TD0 1  
SFO1 400.2824717 MHz  
NUC1 1H  
P0 3.62 usec  
P1 10.86 usec  
PLW1 17.00000000 W

F2 - Processing parameters  
SI 65536  
SF 400.2800000 MHz  
WDW EM  
SSB 0  
LB 0.30 Hz  
GB 0  
PC 1.00

<sup>13</sup>C NMR (150 MHz, CD<sub>3</sub>OD), (E)-3-(5-((4-((1-(2-(2-((2-(2,6-dioxopiperidin-3-yl)-1-oxoisindolin-4-yl)amino)-2-

oxoethoxy)ethoxy)ethyl)-1H-1,2,3-triazol-4-yl)methoxy)benzyl)carbamoyl)-[1,1'-biphenyl]-3-yl)acrylic acid (**5**)

AVC-2-66HH

MeOD

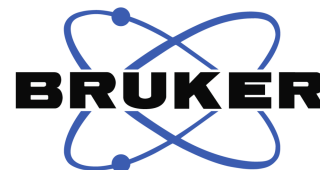

Current Data Parameters  
NAME Jul18-2022-PTLab-600M  
EXPNO 11  
PROCNO 1

F2 - Acquisition Parameters  
Date\_ 20220718  
Time 15.05 h  
INSTRUM spect  
PROBHD z150313\_0002 (  
PULPROG zgpg30  
TD 65536  
SOLVENT MeOD  
NS 3072  
DS 4  
SWH 36057.691 Hz  
FIDRES 1.100393 Hz  
AQ 0.9087659 sec  
RG 194.35  
DW 13.867 usec  
DE 25.00 usec  
TE 298.0 K  
D1 2.00000000 sec  
D11 0.03000000 sec  
TD0 1  
SFO1 150.8349112 MHz  
NUC1 13C  
P0 4.00 usec  
P1 12.00 usec  
PLW1 95.00000000 W  
SFO2 599.8023992 MHz  
NUC2 1H  
CPDPRG[2] waltz16  
PCPD2 70.00 usec  
PLW2 7.09999990 W  
PLW12 0.09273500 W  
PLW13 0.04664500 W

F2 - Processing parameters  
SI 65536  
SF 150.8199049 MHz  
WDW EM  
SSB 0  
LB 3.00 Hz  
GB 0  
PC 1.40

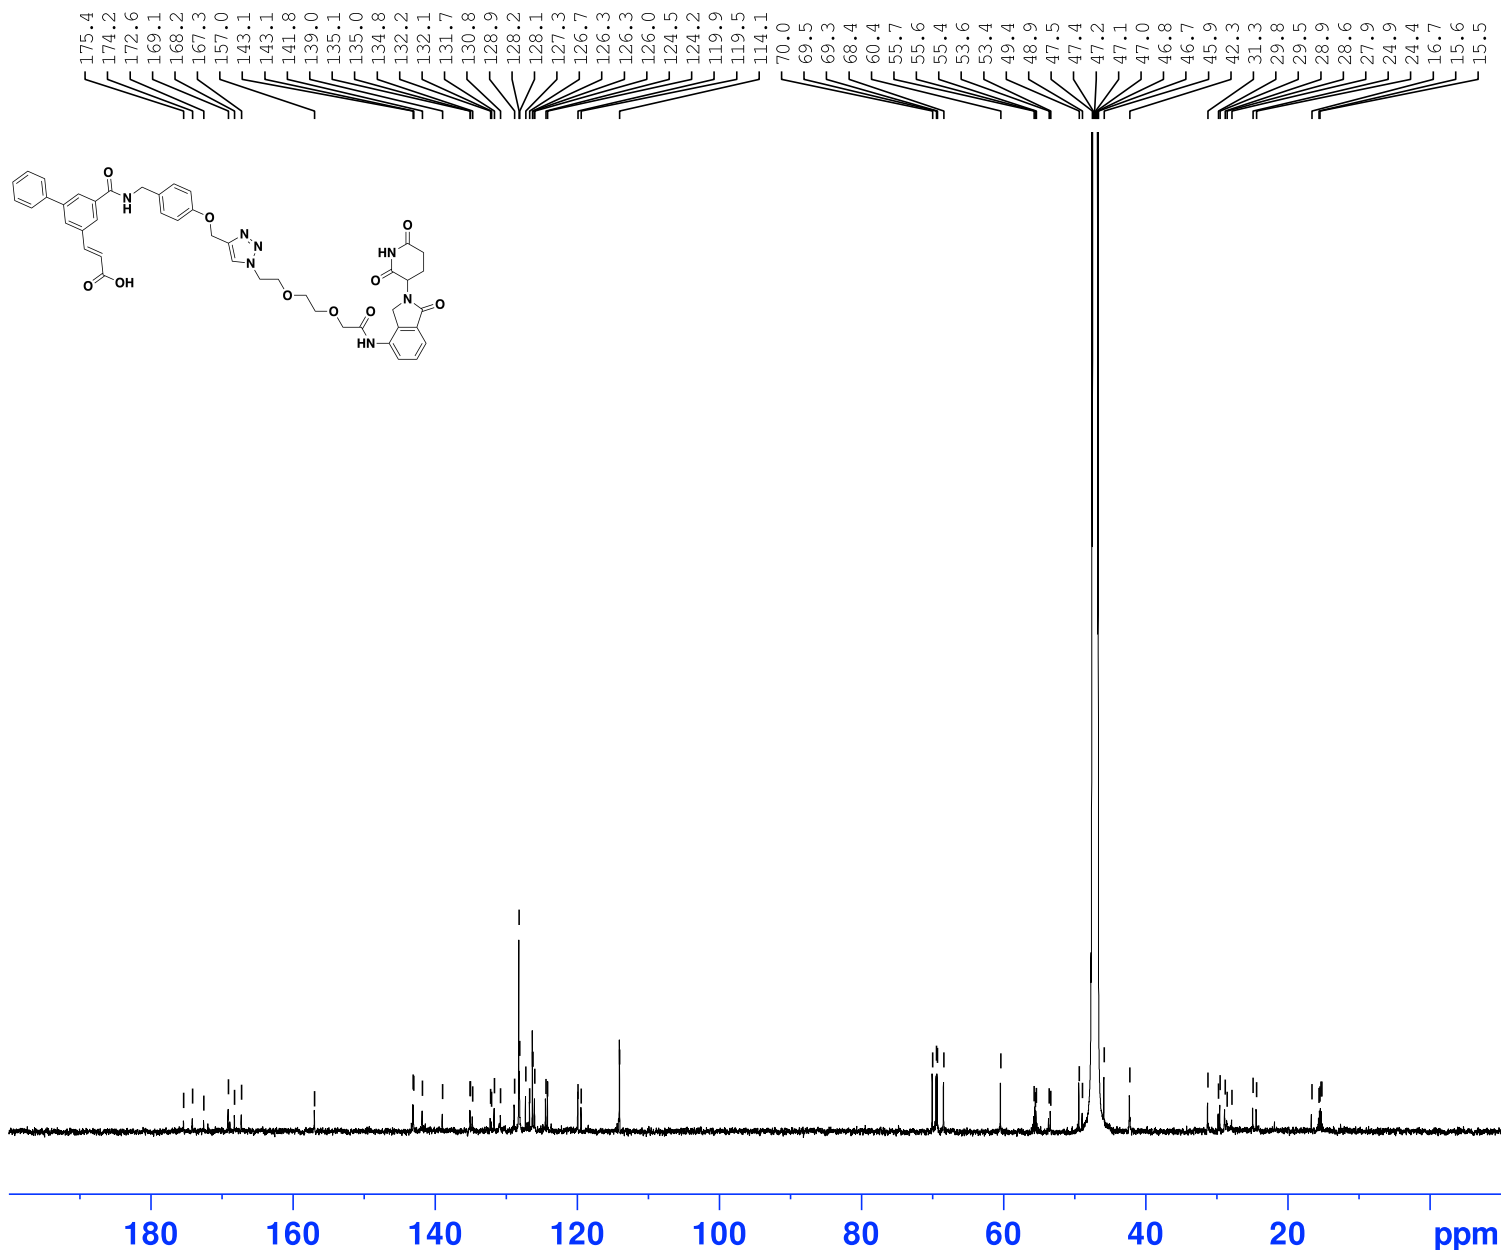

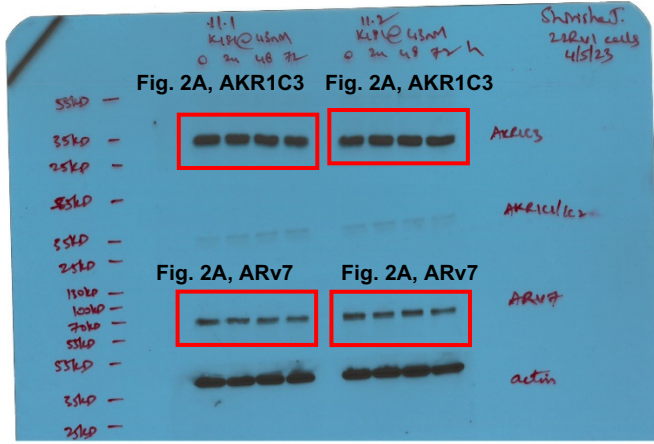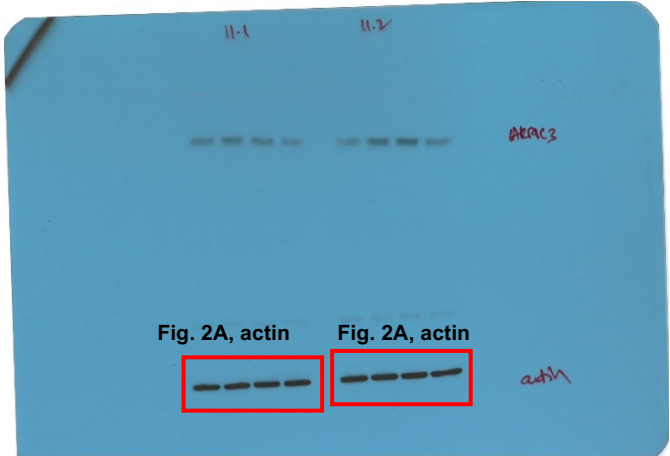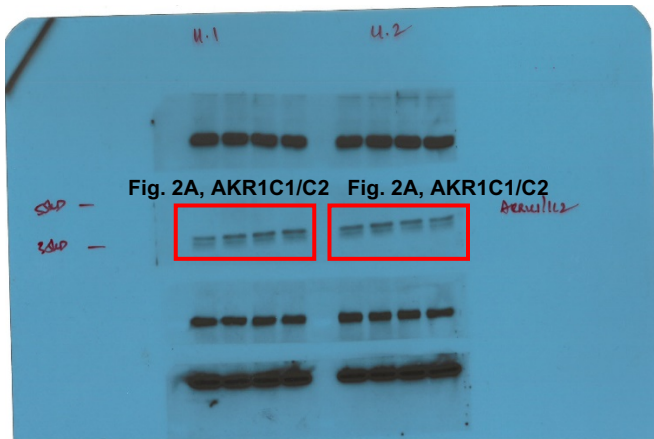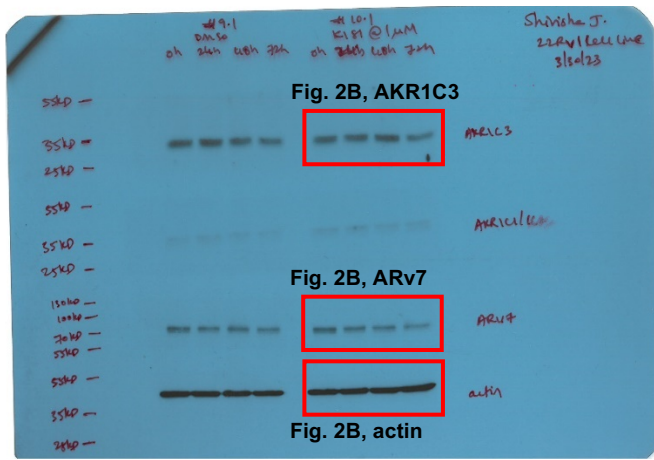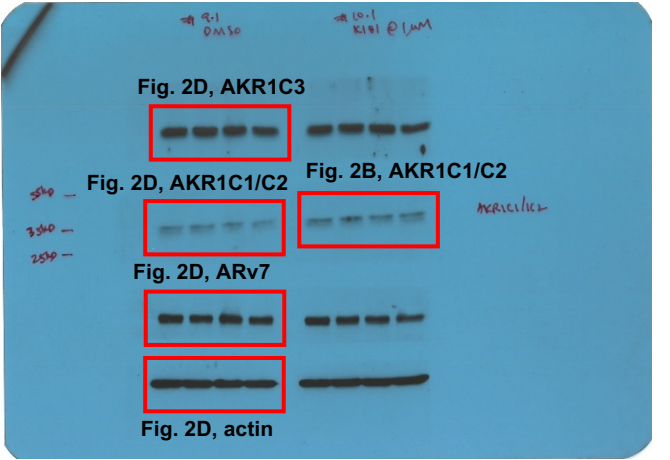

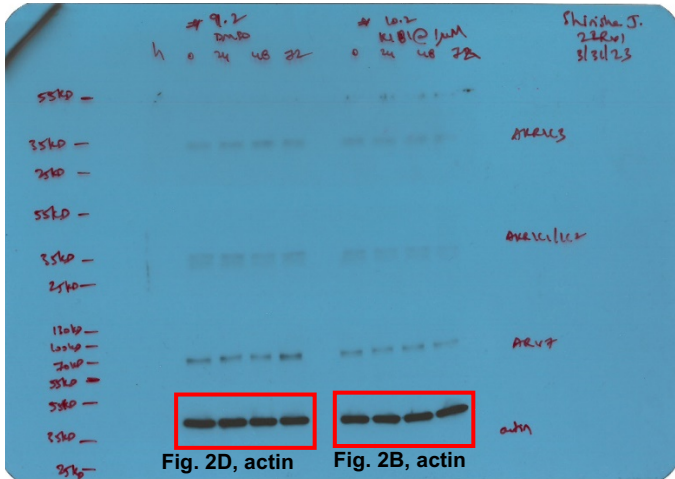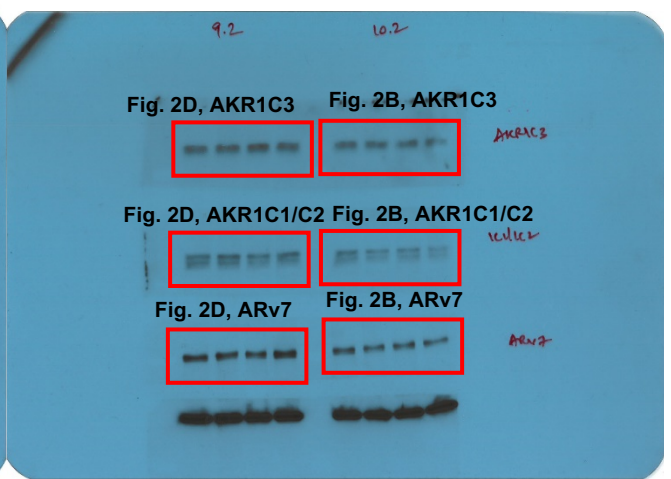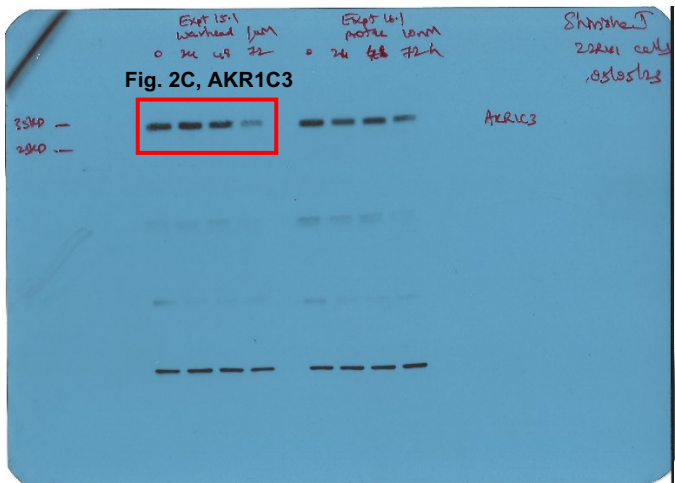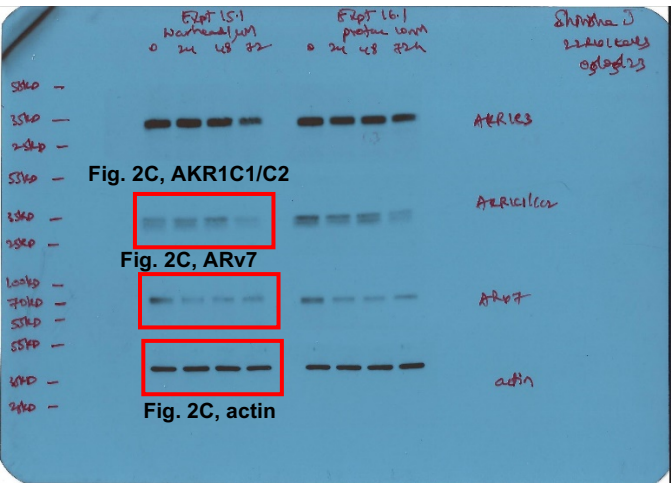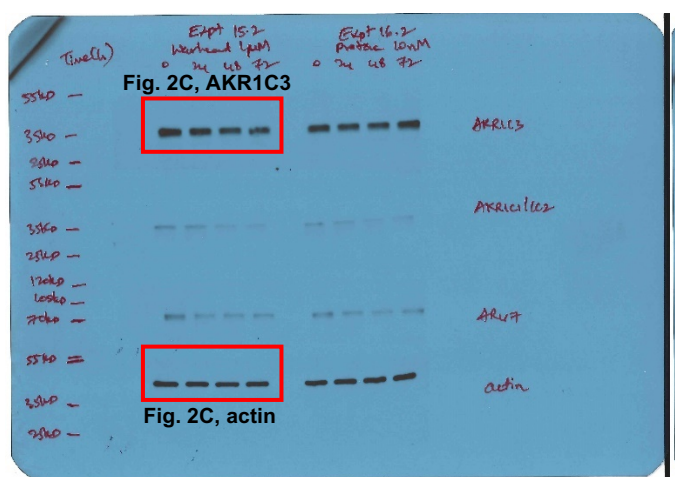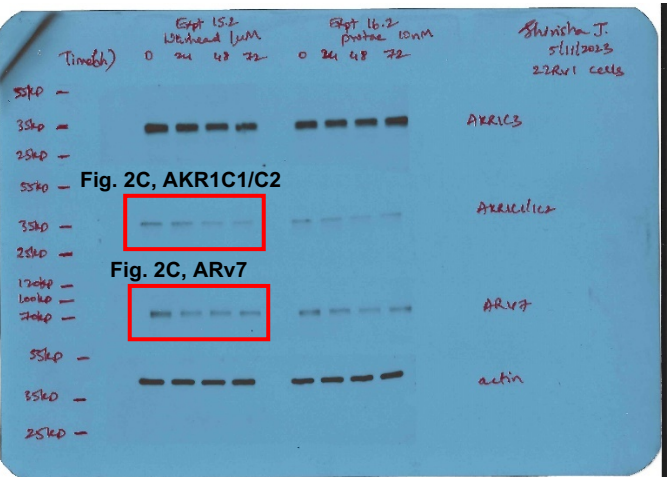

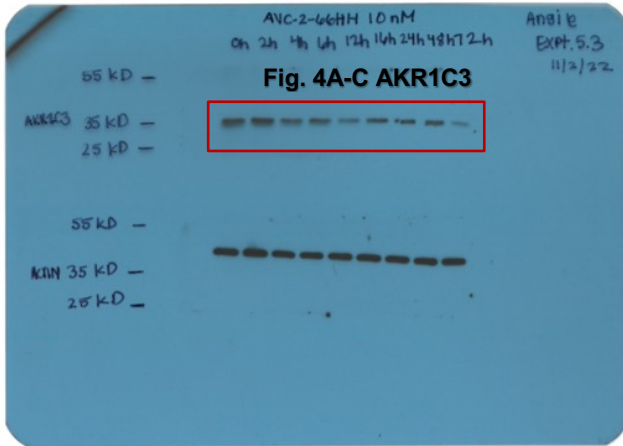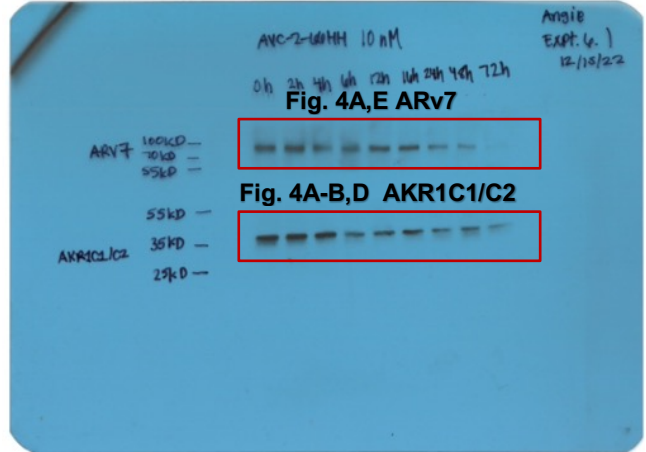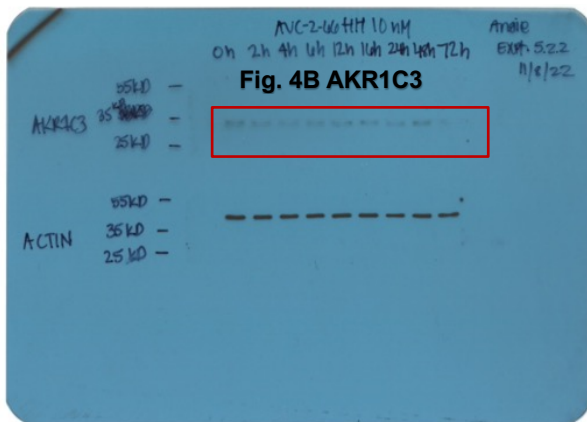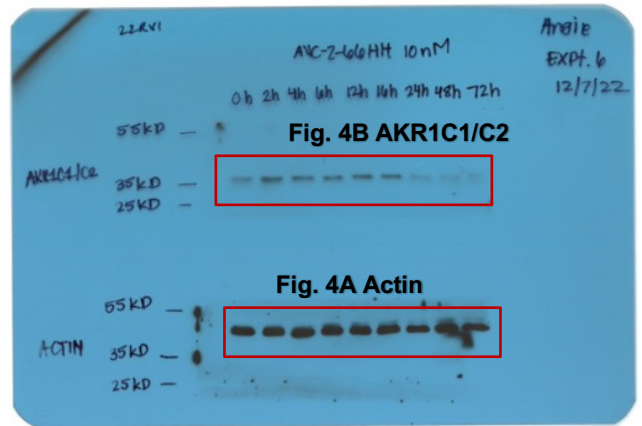

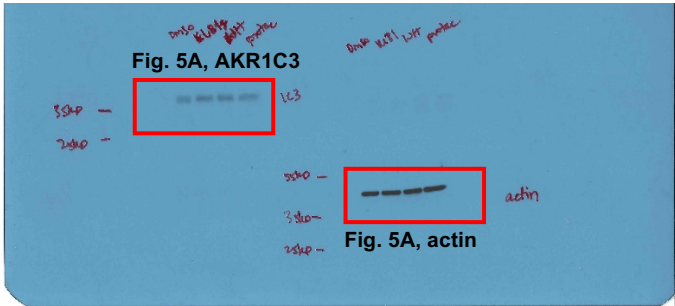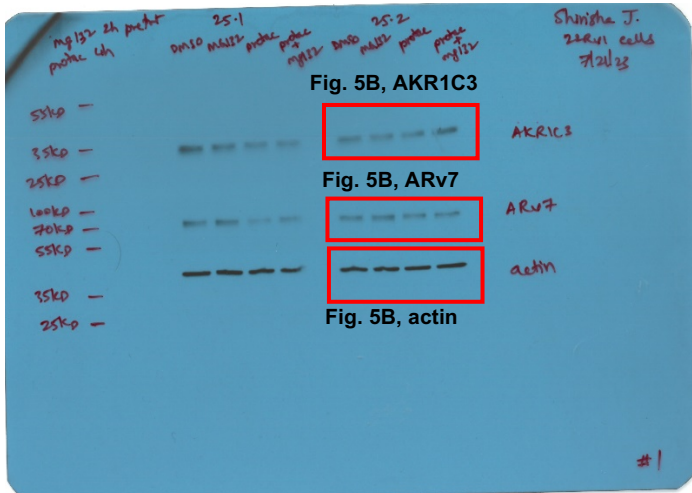

Supplement: 42004_2024_1177_MOESM1_ESM.pdf [file 42004_2024_1177_MOESM1_ESM.pdf]
