# Supplementary material for: Discovery of an Aldo-Keto reductase 1C3 (AKR1C3) degrader
Source: PubMed Central journal article supplement (PMC11059152; doi:10.1038/s42004-024-01177-4), 2024-04-29
Supplement: 42004_2024_1177_MOESM2_ESM.pdf [file 42004_2024_1177_MOESM2_ESM.pdf]

# Description of Additional Supplementary Files

**File name:** Supplementary Data 1

**Description:** Source data for all graphs
